# Supplementary material for: Radical trifunctionalization of hexenenitrile via remote cyano migration
Source: Royal Society of Chemistry journal article supplement (doi:10.1039/d1cc06687k), 2021-12-15

## Supporting Information

### **Radical trifunctionalization of hexenenitrile by remote cyano migration**

Chenyang Chang,<sup>a</sup> Huihui Zhang,<sup>a</sup> Xinxin Wu,<sup>a</sup> and Chen Zhu<sup>\*ab</sup>

<sup>a</sup>Key Laboratory of Organic Synthesis of Jiangsu Province, College of Chemistry, Chemical Engineering and Materials Science, Soochow University, 199 Ren-Ai Road, Suzhou, Jiangsu 215123, China

<sup>b</sup>Key Laboratory of Synthetic Chemistry of Natural Substances, Shanghai Institute of Organic Chemistry, Chinese Academy of Sciences, 345 Lingling Road, Shanghai 200032, China.

Email: [chzhu@suda.edu.cn](mailto:chzhu@suda.edu.cn)

### **Table of Contents**

|                                                                         |     |
|-------------------------------------------------------------------------|-----|
| 1. General experimental details                                         | S2  |
| 2. General procedures for synthesis of starting materials               | S2  |
| 3. General procedure for radical trifunctionalization of hexenenitriles | S3  |
| 4. Characterization of starting materials                               | S3  |
| 5. Characterization of products                                         | S10 |
| 6. <sup>1</sup> H, <sup>13</sup> C, <sup>19</sup> F NMR spectra         | S19 |

## 1. General Experimental Details

All reactions were maintained under a nitrogen atmosphere unless otherwise stated. Commercially available reagents were used without further purification. Infrared (FT-IR) spectra were recorded on a BRUKER VERTEX 70,  $\nu_{\max}$  in  $\text{cm}^{-1}$ .  $^1\text{H}$ -NMR spectra were recorded on a BRUKER AVANCE III HD (400 MHz) spectrometer. Chemical shifts are reported in ppm from tetramethylsilane with the solvent resonance as internal standard ( $\text{CDCl}_3$ :  $\delta$  7.26). Data are reported as follows: chemical shift, multiplicity (s = singlet, d = doublet, t = triplet, q = quadruplet, br = broad, m = multiplet), coupling constants (Hz) and integration.  $^{13}\text{C}$ -NMR spectra were recorded on a BRUKER AVANCE III HD (100 MHz) spectrometer with complete proton decoupling. Chemical shifts are reported in ppm from tetramethylsilane with the solvent resonance as the internal standard ( $\text{CDCl}_3$ :  $\delta$  77.16).  $^{19}\text{F}$ -NMR spectra were recorded on a BRUKER AVANCE III HD (376 MHz) spectrometer. Mass spectra were measured with an Agilent Technologies 6120 Quadrupole LC/MS. High resolution mass spectrometry (HRMS) were measured with a GCT Premier<sup>TM</sup> and BRUKER microOTF-Q III. Melting points were measured using INESA WRR and values are uncorrected.

## 2. General procedures for synthesis of starting materials

The starting materials **1a-1h**, **1o-1ad** were prepared according to **General Procedure B**.

The starting materials **1i-1n** were prepared according to **General Procedure A**.

### General Procedure A

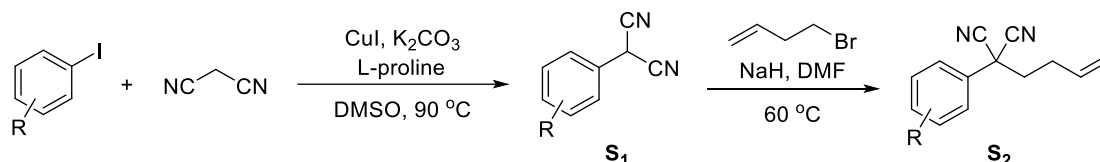

**Step 1:** To a dry round bottom flask was added malononitrile (30 mmol, 3.0 equiv.), cuprous iodide (1 mmol, 10 mol %), L-proline (2 mmol, 20 mol %), potassium carbonate (40 mmol, 4.0 equiv.), iodobenzene (10 mmol, 1.0 equiv.), and DMSO (40 mL) at rt. The reaction mixture was stirred at  $90\text{ }^\circ\text{C}$  overnight under  $\text{N}_2$  and quenched with HCl (2 M, 20 mL). The reaction was extracted with ethyl acetate, and the combined organic layer was washed with brine, dried over  $\text{MgSO}_4$ , filtered, concentrated in vacuum, and purified by flash column chromatography on silica gel (ethyl acetate/ petroleum ether) to give **S1**.

**Step 2:** To a dry round bottom flask was sequentially added sodium hydride (6 mmol, 1.2 equiv.), DMF (20 mL), and then **S1** (5 mmol, 1.0 equiv.) at  $0\text{ }^\circ\text{C}$ . The reaction mixture was stirred at rt for 1 h under  $\text{N}_2$  and then 4-bromo-1-butene (6 mmol, 1.2 equiv.) was added dropwise at rt. The reaction mixture was stirred at  $60\text{ }^\circ\text{C}$  overnight and quenched with sat.  $\text{NH}_4\text{Cl}$  (20 mL). The reaction was extracted with ethyl acetate, concentrated in vacuum, and purified by flash column chromatography on silica gel (ethyl acetate/ petroleum ether) to give **S2**.

### General Procedure B

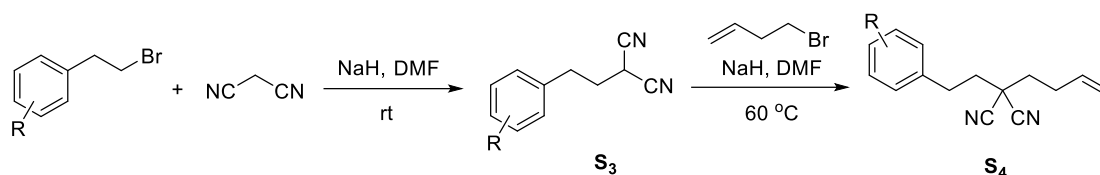

**Step 1:** To a dry round bottom flask was added sodium hydride (10 mmol, 1.0 equiv.), malononitrile (20 mmol, 2.0 equiv.), and DMF (30 mL) at 0 °C. The reaction mixture was stirred at 0 °C for 2 h under N<sub>2</sub> and then phenethyl bromide (10 mmol, 1.0 equiv.) was added dropwise. The reaction mixture was stirred at rt overnight. After the reaction was complete, the mixture was quenched with sat. NH<sub>4</sub>Cl (20 mL). The reaction was extracted with ethyl acetate, and the combined organic layer was washed with brine, dried over MgSO<sub>4</sub>, filtered, concentrated in vacuum, and purified by flash column chromatography on silica gel (ethyl acetate/ petroleum ether) to give **S3**.

**Step 2:** To a dry round bottom flask was sequentially added sodium hydride (6 mmol, 1.2 equiv.), DMF (20 mL), and then **S3** (5 mmol, 1.0 equiv.) at 0 °C. The reaction mixture was stirred at rt for 1 h under N<sub>2</sub> and then 4-bromo-1-butene (6 mmol, 1.2 equiv.) was added dropwise at rt. The reaction mixture was stirred at 60 °C overnight and quenched with sat. NH<sub>4</sub>Cl (20 mL). The reaction was extracted with ethyl acetate, concentrated in vacuum, and purified by flash column chromatography on silica gel (ethyl acetate/ petroleum ether) to give **S4**.

### 3. General procedure for radical trifunctionalization of hexenenitriles

Hexenenitrile **1** (0.2 mmol, 1.0 equiv.) and PIFA (0.4 mmol, 2.0 equiv.) were loaded in a flame-dried glass reaction vial which was subjected to evacuation/ flushing with N<sub>2</sub> for three times. DCM (2.0 mL) was added to the mixture via syringe and then TMSN<sub>3</sub> (0.8 mmol, 4.0 equiv.) was added. The mixture was then stirred at rt until the starting material had been consumed as determined by TLC. The mixture was extracted with ethyl acetate (3 × 10 mL). The combined organic extracts were washed by brine, dried over MgSO<sub>4</sub>, filtered, concentrated, and purified by flash column chromatography on silica gel (ethyl acetate/ petroleum ether) to give the product **2**.

### 4. Characterization of starting materials

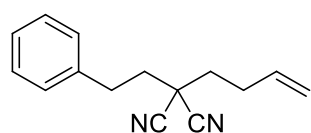

**1a:** 80% yield, yellow oil. Purification by flash column chromatography on silica gel (eluent: EtOAc/Petroleum ether = 1/15). <sup>1</sup>H NMR (400 MHz, CDCl<sub>3</sub>) δ 7.38-7.32 (m, 2H), 7.31-7.26 (m, 1H), 7.26-7.22 (m, 2H), 5.89-5.78 (m, 1H), 5.24-5.12 (m, 2H), 3.05-2.97 (m, 2H), 2.52-2.44 (m, 2H), 2.28-2.20 (m, 2H), 2.11-2.04 (m, 2H); <sup>13</sup>C NMR (100 MHz, CDCl<sub>3</sub>) δ 138.4, 134.5, 128.9, 128.4, 127.0, 117.5, 115.3, 39.7, 37.2, 37.0, 31.9, 29.7. FT-IR: ν (cm<sup>-1</sup>) 3029, 2932, 2863, 2359, 1644, 1455. HRMS [ESI] m/z: [M+Na]<sup>+</sup> calcd for C<sub>15</sub>H<sub>16</sub>NaN<sub>2</sub> 247.1206; found 247.1203.

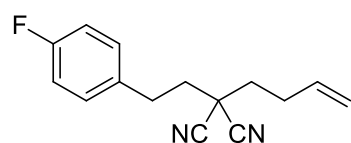

**1b:** 70% yield, yellow oil. Purification by flash column chromatography on silica gel (eluent: EtOAc/Petroleum ether = 1/15). <sup>1</sup>H NMR (400 MHz, CDCl<sub>3</sub>) δ 7.22-7.15 (m, 2H),

7.06-6.98 (m, 2H), 5.88-5.76 (m, 1H), 5.21-5.10 (m, 2H), 3.01-2.94 (m, 2H), 2.51-2.42 (m, 2H), 2.24-2.16 (m, 2H), 2.10-2.03 (m, 2H);  $^{13}\text{C}$  NMR (100 MHz,  $\text{CDCl}_3$ )  $\delta$  161.9 (d,  $J_{\text{C-F}} = 244.1$  Hz), 134.4, 134.0 (d,  $J_{\text{C-F}} = 3.2$  Hz), 129.9 (d,  $J_{\text{C-F}} = 7.9$  Hz), 117.5, 115.7 (d,  $J_{\text{C-F}} = 21.2$  Hz), 115.2, 39.8, 37.1, 37.1, 31.2, 29.7;  $^{19}\text{F}$  NMR (376 MHz,  $\text{CDCl}_3$ )  $\delta$  -115.6 (s). FT-IR:  $\nu$  ( $\text{cm}^{-1}$ ) 3079, 2934, 2863, 1603, 1510, 1455, 1222. HRMS [ESI]  $m/z$ :  $[\text{M}+\text{Na}]^+$  calcd for  $\text{C}_{15}\text{H}_{15}\text{NaFN}_2$  265.1111; found 265.1115.

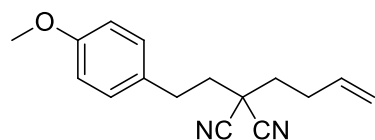

**1c:** 36% yield, yellow oil. Purification by flash column chromatography on silica gel (eluent: EtOAc/Petroleum ether = 1/15).  $^1\text{H}$  NMR (400 MHz,  $\text{CDCl}_3$ )  $\delta$  7.16-7.11 (m, 2H), 6.88-6.84 (m, 2H), 5.88-5.76 (m, 1H), 5.20-5.10 (m, 2H), 3.80 (s, 3H), 2.97-2.91 (m, 2H), 2.50-2.42 (m, 2H), 2.22-2.16 (m, 2H), 2.09-2.03 (m, 2H);  $^{13}\text{C}$  NMR (100 MHz,  $\text{CDCl}_3$ )  $\delta$  158.6, 134.5, 130.4, 129.4, 117.5, 115.3, 114.3, 55.3, 40.0, 37.1, 37.1, 31.1, 29.7. FT-IR:  $\nu$  ( $\text{cm}^{-1}$ ) 2959, 2933, 2838, 2359, 2335, 1612, 1513, 1247. HRMS [ESI]  $m/z$ :  $[\text{M}+\text{Na}]^+$  calcd for  $\text{C}_{16}\text{H}_{18}\text{ONaNa}_2$  277.1311; found 277.1309.

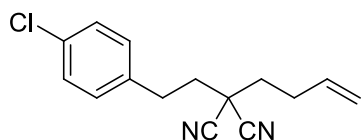

**1d:** 76% yield, yellow oil. Purification by flash column chromatography on silica gel (eluent: EtOAc/Petroleum ether = 1/5).  $^1\text{H}$  NMR (400 MHz,  $\text{CDCl}_3$ )  $\delta$  7.33-7.27 (m, 2H), 7.19-7.13 (m, 2H), 5.87-5.76 (m, 1H), 5.21-5.10 (m, 2H), 3.00-2.94 (m, 2H), 2.51-2.43 (m, 2H), 2.23-2.16 (m, 2H), 2.09-2.03 (m, 2H);  $^{13}\text{C}$  NMR (100 MHz,  $\text{CDCl}_3$ )  $\delta$  136.8, 134.4, 132.9, 129.8, 129.1, 117.6, 115.1, 39.6, 37.2, 37.1, 31.3, 29.7. FT-IR:  $\nu$  ( $\text{cm}^{-1}$ ) 3082, 2932, 2858, 1734, 1644, 1493, 1454. HRMS [ESI]  $m/z$ :  $[\text{M}+\text{Na}]^+$  calcd for  $\text{C}_{15}\text{H}_{15}\text{ClNaNa}_2$  281.0816; found 281.0825.

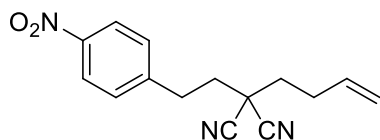

**1e:** 54% yield, yellow oil. Purification by flash column chromatography on silica gel (eluent: EtOAc/Petroleum ether = 1/15).  $^1\text{H}$  NMR (400 MHz,  $\text{CDCl}_3$ )  $\delta$  8.23-8.18 (m, 2H), 7.43-7.39 (m, 2H), 5.88-5.76 (m, 1H), 5.22-5.11 (m, 2H), 3.16-3.09 (m, 2H), 2.52-2.44 (m, 2H), 2.29-2.23 (m, 2H), 2.12-2.06 (m, 2H);  $^{13}\text{C}$  NMR (100 MHz,  $\text{CDCl}_3$ )  $\delta$  147.2, 145.8, 134.2, 129.4, 124.2, 117.7, 114.9, 39.0, 37.2, 31.8, 29.7. FT-IR:  $\nu$  ( $\text{cm}^{-1}$ ) 2962, 2952, 2159, 2027, 1976, 1518, 1345. HRMS [ESI]  $m/z$ :  $[\text{M}+\text{Na}]^+$  calcd for  $\text{C}_{15}\text{H}_{15}\text{N}_3\text{NaO}_2$  292.1056; found 292.1060.

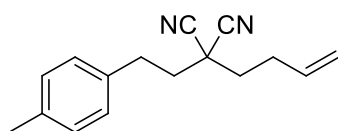

**1f:** 31% yield, yellow oil. Purification by flash column chromatography on silica gel (eluent: EtOAc/Petroleum ether = 1/15).  $^1\text{H}$  NMR (400 MHz,  $\text{CDCl}_3$ )  $\delta$  7.17-7.09 (m, 4H), 5.88-5.77 (m, 1H), 5.22-5.10 (m, 2H), 3.00-2.92 (m, 2H), 2.51-2.43 (m, 2H), 2.34 (s, 3H), 2.24-2.17 (m, 2H), 2.10-2.03 (m, 2H);  $^{13}\text{C}$  NMR (100 MHz,  $\text{CDCl}_3$ )  $\delta$  136.6, 135.3, 134.5, 129.5, 128.3, 117.4, 115.3, 39.8, 37.2, 37.1, 31.5, 29.7, 21.0. FT-IR:  $\nu$  ( $\text{cm}^{-1}$ ) 3385, 2977, 2928, 2360, 2341, 1644, 1516, 1455. HRMS [ESI]  $m/z$ :  $[\text{M}+\text{Na}]^+$  calcd for  $\text{C}_{16}\text{H}_{18}\text{NaNa}_2$  261.1362; found 261.1359.

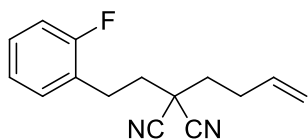

**1g:** 62% yield, yellow oil. Purification by flash column chromatography on silica gel (eluent: EtOAc/Petroleum ether = 1/15).  $^1\text{H}$  NMR (400 MHz,  $\text{CDCl}_3$ )  $\delta$  7.33-7.25 (m, 2H), 7.18-7.06 (m, 2H), 5.92-5.81 (m, 1H), 5.25-5.14 (m, 2H), 3.09-3.03 (m, 2H), 2.54-2.46 (m, 2H), 2.31-2.25 (m, 2H), 2.14-2.08 (m, 2H);  $^{13}\text{C}$  NMR (100 MHz,  $\text{CDCl}_3$ )  $\delta$  161.1 (d,  $J_{\text{C-F}} = 244.1$  Hz), 134.5, 130.7 (d,  $J_{\text{C-F}} = 4.5$  Hz), 129.0 (d,  $J_{\text{C-F}} = 8.2$  Hz), 125.3 (d,  $J_{\text{C-F}} = 15.6$  Hz), 124.5 (d,  $J_{\text{C-F}} = 3.6$  Hz), 117.5, 115.6 (d,  $J_{\text{C-F}} = 21.6$  Hz), 115.1, 37.8 (d,  $J_{\text{C-F}} = 1.3$  Hz), 37.1, 36.9, 29.7, 25.8 (d,  $J_{\text{C-F}} = 2.6$  Hz);  $^{19}\text{F}$  NMR (376 MHz,  $\text{CDCl}_3$ )  $\delta$  -118.4 (s). FT-IR:  $\nu$  ( $\text{cm}^{-1}$ ) 3406, 2977, 2935, 2159, 2030, 1976, 1454. HRMS [ESI]  $m/z$ :  $[\text{M}+\text{Na}]^+$  calcd for  $\text{C}_{15}\text{H}_{15}\text{FNaN}_2$  265.1111; found 265.1113.

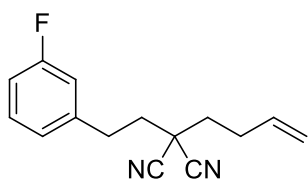

**1h:** 33% yield, yellow oil. Purification by flash column chromatography on silica gel (eluent: EtOAc/Petroleum ether = 1/15).  $^1\text{H}$  NMR (400 MHz,  $\text{CDCl}_3$ )  $\delta$  7.34-7.26 (m, 1H), 7.04-6.90 (m, 3H), 5.88-5.77 (m, 1H), 5.22-5.11 (m, 2H), 3.03-2.97 (m, 2H), 2.51-2.43 (m, 2H), 2.25-2.19 (m, 2H), 2.10-2.04 (m, 2H);  $^{13}\text{C}$  NMR (100 MHz,  $\text{CDCl}_3$ )  $\delta$  163.0 (d,  $J_{\text{C-F}} = 245.2$  Hz), 140.8 (d,  $J_{\text{C-F}} = 7.2$  Hz), 134.4, 130.5 (d,  $J_{\text{C-F}} = 8.4$  Hz), 124.1 (d,  $J_{\text{C-F}} = 2.9$  Hz), 117.5, 115.4 (d,  $J_{\text{C-F}} = 21.4$  Hz), 115.1, 114.0 (d,  $J_{\text{C-F}} = 20.7$  Hz), 39.3, 37.1, 37.1, 31.6, 29.7;  $^{19}\text{F}$  NMR (376 MHz,  $\text{CDCl}_3$ )  $\delta$  -112.6 (s). FT-IR:  $\nu$  ( $\text{cm}^{-1}$ ) 3083, 2935, 2864, 2359, 2249, 1590, 1489, 1252. HRMS [ESI]  $m/z$ :  $[\text{M}+\text{Na}]^+$  calcd for  $\text{C}_{15}\text{H}_{15}\text{NaFN}_2$  265.1111; found 265.1118.

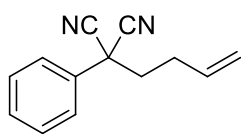

**1i:** 75% yield, yellow oil. Purification by flash column chromatography on silica gel (eluent: EtOAc/Petroleum ether = 1/5).  $^1\text{H}$  NMR (400 MHz,  $\text{CDCl}_3$ )  $\delta$  7.60-7.55 (m, 2H), 7.53-7.44 (m, 3H), 5.83-5.71 (m, 1H), 5.15-5.06 (m, 2H), 2.42-2.34 (m, 2H), 2.34-2.28 (m, 2H);  $^{13}\text{C}$  NMR (100 MHz,  $\text{CDCl}_3$ )  $\delta$  134.3, 132.0, 130.0, 129.8, 125.8, 117.3, 114.9, 42.0, 41.7, 29.7. FT-IR:  $\nu$  ( $\text{cm}^{-1}$ ) 2979, 2936, 2361, 2159, 1559, 1541. HRMS [ESI]  $m/z$ :  $[\text{M}+\text{Na}]^+$  calcd for  $\text{C}_{13}\text{H}_{12}\text{NaN}_2$  219.0893; found 219.0898.

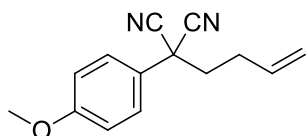

**1j:** 90% yield, yellow oil. Purification by flash column chromatography on silica gel (eluent: EtOAc/Petroleum ether = 1/5).  $^1\text{H}$  NMR (400 MHz,  $\text{CDCl}_3$ )  $\delta$  7.50-7.44 (m, 2H), 7.01-6.96 (m, 2H), 5.82-5.70 (m, 1H), 5.14-5.05 (m, 2H), 3.84 (s, 3H), 2.40-2.32 (m, 2H), 2.31-2.25 (m, 2H);  $^{13}\text{C}$  NMR (100 MHz,  $\text{CDCl}_3$ )  $\delta$  160.6, 134.4, 127.1, 123.6, 117.2, 115.1, 115.0, 55.5, 41.7, 41.3, 29.6. FT-IR:  $\nu$  ( $\text{cm}^{-1}$ ) 2976, 2936, 2842, 2159, 2029, 1609, 1511, 1257. HRMS [ESI]  $m/z$ :  $[\text{M}+\text{H}]^+$  calcd for  $\text{C}_{14}\text{H}_{15}\text{N}_2\text{O}$  227.1179; found 227.1184.

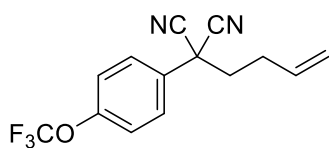

**1k:** 60% yield, yellow oil. Purification by flash column chromatography on silica gel (eluent: EtOAc/Petroleum ether = 1/5).  $^1\text{H}$  NMR (400 MHz,  $\text{CDCl}_3$ )  $\delta$  7.65-7.60 (m, 2H), 7.38-7.33 (m, 2H), 5.82-5.70 (m, 1H), 5.16-5.08 (m, 2H), 2.44-2.36 (m, 2H), 2.34-2.27 (m, 2H);  $^{13}\text{C}$  NMR (100 MHz,  $\text{CDCl}_3$ )  $\delta$  150.2 (q,  $J = 1.8$  Hz), 134.0, 130.6, 127.6, 122.0, 120.3 (q,  $J = 257.1$  Hz), 117.5, 114.5, 41.7, 41.4, 29.7;  $^{19}\text{F}$  NMR (376 MHz,  $\text{CDCl}_3$ )  $\delta$  -57.9

(s). FT-IR:  $\nu$  ( $\text{cm}^{-1}$ ) 2976, 2935, 2361, 2159, 1734, 1509, 1212. HRMS [ESI]  $m/z$ :  $[\text{M}+\text{H}]^+$  calcd for  $\text{C}_{14}\text{H}_{12}\text{F}_3\text{N}_2\text{O}$  281.0896; found 281.0887.

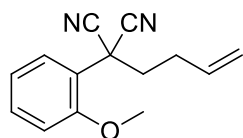

**1l**: 69% yield, yellow oil. Purification by flash column chromatography on silica gel (eluent: EtOAc/Petroleum ether = 1/5).  $^1\text{H}$  NMR (400 MHz,  $\text{CDCl}_3$ )  $\delta$  7.55 (dd, 8.0, 1.6 Hz, 1H), 7.48-7.42 (m, 1H), 7.08-7.00 (m, 2H), 5.84-5.73 (m, 1H), 5.14-5.04 (m, 2H), 3.96 (s, 3H), 2.48-2.41 (m, 2H), 2.41-2.33 (m, 2H);  $^{13}\text{C}$  NMR (100 MHz,  $\text{CDCl}_3$ )  $\delta$  156.4, 134.9, 131.7, 127.6, 121.3, 119.1, 116.9, 114.8, 112.6, 56.0, 39.6, 36.6, 29.8. FT-IR:  $\nu$  ( $\text{cm}^{-1}$ ) 3082, 2978, 2940, 2159, 2029, 1976, 1599, 1494, 1464, 1257. HRMS [ESI]  $m/z$ :  $[\text{M}+\text{Na}]^+$  calcd for  $\text{C}_{14}\text{H}_{14}\text{NaN}_2\text{O}$  249.0998; found 249.0991.

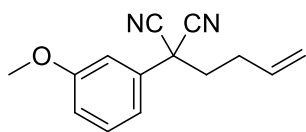

**1m**: 44% yield, yellow oil. Purification by flash column chromatography on silica gel (eluent: EtOAc/Petroleum ether = 1/5).  $^1\text{H}$  NMR (400 MHz,  $\text{CDCl}_3$ )  $\delta$  7.43-7.37 (m, 1H), 7.17-7.12 (m, 1H), 7.11-7.06 (m, 1H), 7.00-6.96 (m, 1H), 5.82-5.71 (m, 1H), 5.15-5.06 (m, 2H), 3.86 (s, 3H), 2.42-2.34 (m, 2H), 2.33-2.27 (m, 2H);  $^{13}\text{C}$  NMR (100 MHz,  $\text{CDCl}_3$ )  $\delta$  160.5, 134.3, 133.3, 130.9, 117.8, 117.3, 115.2, 114.8, 111.8, 55.5, 41.9, 41.6, 29.7. FT-IR:  $\nu$  ( $\text{cm}^{-1}$ ) 3082, 2973, 2938, 2359, 2341, 1588, 1492, 1295, 1259. HRMS [ESI]  $m/z$ :  $[\text{M}+\text{Na}]^+$  calcd for  $\text{C}_{14}\text{H}_{14}\text{NaN}_2\text{O}$  249.0998; found 249.0989.

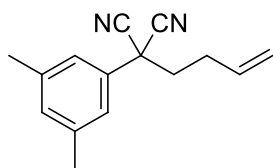

**1n**: 86% yield, yellow oil. Purification by flash column chromatography on silica gel (eluent: EtOAc/Petroleum ether = 1/5).  $^1\text{H}$  NMR (400 MHz,  $\text{CDCl}_3$ )  $\delta$  7.15 (s, 2H), 7.07 (s, 1H), 5.83-5.71 (m, 1H), 5.15-5.06 (m, 2H), 2.42-2.34 (m, 2H), 2.37 (s, 6H), 2.32-2.24 (m, 2H);  $^{13}\text{C}$  NMR (100 MHz,  $\text{CDCl}_3$ )  $\delta$  139.7, 134.4, 131.7, 131.5, 123.4, 117.2, 115.1, 41.8, 41.7, 29.7, 21.3. FT-IR:  $\nu$  ( $\text{cm}^{-1}$ ) 2954, 2923, 2854, 2362, 2330, 1721, 1605, 1456, 1378, 1215. HRMS [ESI]  $m/z$ :  $[\text{M}+\text{Na}]^+$  calcd for  $\text{C}_{15}\text{H}_{16}\text{NaN}_2$  247.1206; found 247.1196.

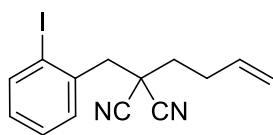

**1o**: 10% yield, yellow oil. Purification by flash column chromatography on silica gel (eluent: EtOAc/Petroleum ether = 1/15).  $^1\text{H}$  NMR (400 MHz,  $\text{CDCl}_3$ )  $\delta$  7.93 (dd,  $J$  = 8.0, 1.2 Hz, 1H), 7.57 (dd,  $J$  = 7.6, 1.6 Hz, 1H), 7.44-7.39 (m, 1H), 7.10-7.04 (m, 1H), 5.89-5.78 (m, 1H), 5.22-5.10 (m, 2H), 3.51 (s, 2H), 2.54-2.46 (m, 2H), 2.19-2.12 (m, 2H);  $^{13}\text{C}$  NMR (100 MHz,  $\text{CDCl}_3$ )  $\delta$  140.5, 135.4, 134.5, 130.8, 130.5, 129.0, 117.4, 114.9, 102.4, 46.2, 38.5, 36.8, 29.9. FT-IR:  $\nu$  ( $\text{cm}^{-1}$ ) 2973, 2928, 2884, 2360, 2342, 1380. HRMS [ESI]  $m/z$ :  $[\text{M}+\text{Na}]^+$  calcd for  $\text{C}_{14}\text{H}_{13}\text{NaN}_2$  359.0016; found 359.0008.

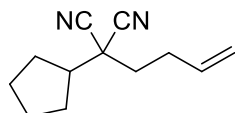

**1p**: 83% yield, yellow oil. Purification by flash column chromatography on silica gel (eluent: EtOAc/Petroleum ether = 1/15).  $^1\text{H}$  NMR (400 MHz,  $\text{CDCl}_3$ )  $\delta$  5.87-5.76 (m, 1H), 5.19-5.08 (m, 2H), 2.48-2.41 (m, 2H), 2.39-2.29 (m, 1H), 2.05-1.95 (m, 4H), 1.87-1.75 (m, 2H), 1.69-1.59 (m, 3H), 1.57-1.53 (m, 1H);  $^{13}\text{C}$  NMR (100 MHz,  $\text{CDCl}_3$ )  $\delta$  134.8, 117.2, 115.3, 46.6, 41.9, 36.3, 30.0, 29.2, 25.2. FT-IR:  $\nu$  ( $\text{cm}^{-1}$ ) 2961, 2927, 2872, 2159, 2031, 1976, 1453. HRMS [ESI]  $m/z$ :  $[\text{M}+\text{Na}]^+$  calcd for  $\text{C}_{12}\text{H}_{16}\text{NaN}_2$  211.1206; found 211.1199.

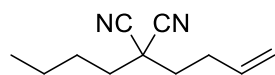

**1q:** 73% yield, yellow oil. Purification by flash column chromatography on silica gel (eluent: EtOAc/Petroleum ether = 1/15).  $^1\text{H}$  NMR (400 MHz,  $\text{CDCl}_3$ )  $\delta$  5.87-5.75 (m, 1H), 5.19-5.08 (m, 2H), 2.47-2.39 (m, 2H), 2.04-1.97 (m, 2H), 1.96-1.90 (m, 2H), 1.70-1.62 (m, 2H), 1.49-1.38 (m, 2H), 0.97 (t,  $J$  = 7.2 Hz, 3H);  $^{13}\text{C}$  NMR (100 MHz,  $\text{CDCl}_3$ )  $\delta$  134.7, 117.3, 115.6, 37.6, 37.4, 37.0, 29.7, 27.6, 22.0, 13.6. FT-IR:  $\nu$  ( $\text{cm}^{-1}$ ) 2963, 2933, 2874, 2159, 2029, 1976, 1645, 1454. HRMS [ESI]  $m/z$ :  $[\text{M}+\text{Na}]^+$  calcd for  $\text{C}_{11}\text{H}_{16}\text{NaN}_2$  199.1206; found 199.1213.

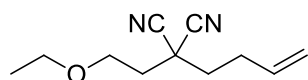

**1r:** 52% yield, yellow oil. Purification by flash column chromatography on silica gel (eluent: EtOAc/Petroleum ether = 1/15).  $^1\text{H}$  NMR (400 MHz,  $\text{CDCl}_3$ )  $\delta$  5.86-5.75 (m, 1H), 5.18-5.07 (m, 2H), 3.72 (t,  $J$  = 6.0 Hz, 2H), 3.53 (q,  $J$  = 7.2 Hz, 2H), 2.47-2.39 (m, 2H), 2.21 (t,  $J$  = 6.0 Hz, 2H), 2.10-2.04 (m, 2H), 1.21 (t,  $J$  = 7.2 Hz, 3H);  $^{13}\text{C}$  NMR (100 MHz,  $\text{CDCl}_3$ )  $\delta$  134.7, 117.2, 115.3, 66.9, 65.9, 37.3, 37.1, 35.1, 29.6, 14.9. FT-IR:  $\nu$  ( $\text{cm}^{-1}$ ) 2978, 2935, 2873, 2359, 2342, 1644, 1380. HRMS [ESI]  $m/z$ :  $[\text{M}+\text{Na}]^+$  calcd for  $\text{C}_{11}\text{H}_{16}\text{NaON}_2$  215.1155; found 215.1155.

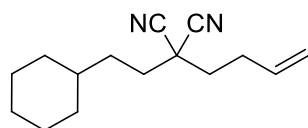

**1s:** 94% yield, yellow oil. Purification by flash column chromatography on silica gel (eluent: EtOAc/Petroleum ether = 1/15).  $^1\text{H}$  NMR (400 MHz,  $\text{CDCl}_3$ )  $\delta$  5.87-5.75 (m, 1H), 5.19-5.09 (m, 2H), 2.47-2.40 (m, 2H), 2.04-1.98 (m, 2H), 1.98-1.92 (m, 2H), 1.76-1.62 (m, 5H), 1.60-1.52 (m, 2H), 1.28-1.14 (m, 4H), 1.02-0.90 (m, 2H);  $^{13}\text{C}$  NMR (100 MHz,  $\text{CDCl}_3$ )  $\delta$  134.7, 117.3, 115.6, 37.5, 37.2, 36.9, 35.7, 33.0, 32.8, 29.7, 26.4, 26.1. FT-IR:  $\nu$  ( $\text{cm}^{-1}$ ) 3083, 2923, 2853, 2159, 2029, 1976, 1644, 1453. HRMS [ESI]  $m/z$ :  $[\text{M}+\text{Na}]^+$  calcd for  $\text{C}_{15}\text{H}_{22}\text{NaN}_2$  253.1675; found 253.1679.

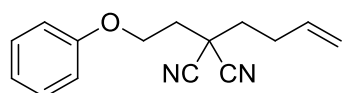

**1t:** 48% yield, yellow oil. Purification by flash column chromatography on silica gel (eluent: EtOAc/Petroleum ether = 1/15).  $^1\text{H}$  NMR (400 MHz,  $\text{CDCl}_3$ )  $\delta$  7.35-7.29 (m, 2H), 7.04-6.99 (m, 1H), 6.97-6.92 (m, 2H), 5.87-5.75 (m, 1H), 5.22-5.11 (m, 2H), 4.31 (t,  $J$  = 6.0 Hz, 2H), 2.54-2.44 (m, 4H), 2.18-2.12 (m, 2H);  $^{13}\text{C}$  NMR (100 MHz,  $\text{CDCl}_3$ )  $\delta$  157.8, 134.5, 129.7, 121.7, 117.5, 115.0, 114.5, 63.3, 37.3, 36.8, 35.1, 29.6. FT-IR:  $\nu$  ( $\text{cm}^{-1}$ ) 2977, 2935, 2159, 2029, 1588, 1497, 1239. HRMS [ESI]  $m/z$ :  $[\text{M}+\text{Na}]^+$  calcd for  $\text{C}_{15}\text{H}_{16}\text{NaN}_2\text{O}$  263.1155; found 263.1145.

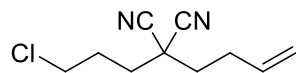

**1u:** 41% yield, yellow oil. Purification by flash column chromatography on silica gel (eluent: EtOAc/Petroleum ether = 1/15).  $^1\text{H}$  NMR (400 MHz,  $\text{CDCl}_3$ )  $\delta$  5.86-5.75 (m, 1H), 5.20-5.08 (m, 2H), 3.65-3.61 (m, 1H), 3.50-3.45 (m, 1H), 2.47-2.39 (m, 2H), 2.27-2.16 (m, 1H), 2.16-2.08 (m, 3H), 2.07-2.00 (m, 2H);  $^{13}\text{C}$  NMR (100 MHz,  $\text{CDCl}_3$ )  $\delta$  134.4, 117.5, 115.1, 43.2, 37.0, 36.9, 35.4, 29.7, 28.4. FT-IR:  $\nu$  ( $\text{cm}^{-1}$ ) 3082, 2966, 2937, 2857, 1644, 1452, 1296. HRMS [ESI]  $m/z$ :  $[\text{M}+\text{Na}]^+$  calcd for  $\text{C}_{10}\text{H}_{13}\text{ClNaN}_2$  219.0659; found 219.0663.

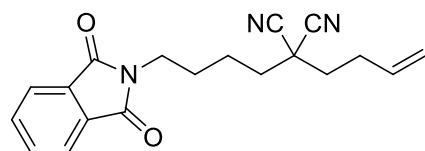

**1v:** 85% yield, white solid. Purification by flash column chromatography on silica gel (eluent: EtOAc/Petroleum ether = 1/15).

ether = 1/5).  $^1\text{H}$  NMR (400 MHz,  $\text{CDCl}_3$ )  $\delta$  7.88-7.82 (m, 2H), 7.75-7.69 (m, 2H), 5.86-5.75 (m, 1H), 5.20-5.08 (m, 2H), 3.74 (t,  $J$  = 6.8 Hz, 2H), 2.48-2.40 (m, 2H), 2.06-1.99 (m, 4H), 1.86-1.68 (m, 4H);  $^{13}\text{C}$  NMR (100 MHz,  $\text{CDCl}_3$ )  $\delta$  168.3, 134.5, 134.1, 132.0, 123.4, 117.4, 115.3, 37.2, 37.2, 36.9, 29.7, 27.7, 22.6. FT-IR:  $\nu$  ( $\text{cm}^{-1}$ ) 3420, 2975, 2938, 2359, 2342, 1773, 1713, 1439. HRMS [ESI]  $m/z$ :  $[\text{M}+\text{Na}]^+$  calcd for  $\text{C}_{19}\text{H}_{19}\text{NaO}_2\text{N}_3$  344.1369; found 344.1368.

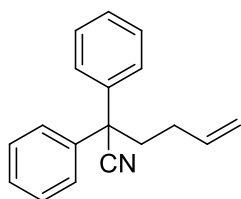

**1w:** 73% yield, yellow oil. Purification by flash column chromatography on silica gel (eluent: EtOAc/Petroleum ether = 1/20).  $^1\text{H}$  NMR (400 MHz,  $\text{CDCl}_3$ )  $\delta$  7.42-7.33 (m, 8H), 7.33-7.27 (m, 2H), 5.87-5.76 (m, 1H), 5.08-4.98 (m, 2H), 2.50-2.44 (m, 2H), 2.22-2.14 (m, 2H);  $^{13}\text{C}$  NMR (100 MHz,  $\text{CDCl}_3$ )  $\delta$  140.0, 136.7, 128.9, 127.9, 126.9, 122.2, 115.7, 51.5, 38.9, 29.9. FT-IR:  $\nu$  ( $\text{cm}^{-1}$ ) 3063, 3028, 2935, 2236, 1493, 1449. HRMS [ESI]  $m/z$ :  $[\text{M}+\text{Na}]^+$  calcd for  $\text{C}_{18}\text{H}_{17}\text{NNa}$  270.1253; found 270.1242.

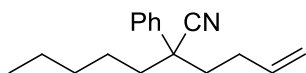

**1x:** 73% yield, yellow oil. Purification by flash column chromatography on silica gel (eluent: EtOAc/Petroleum ether = 1/20).  $^1\text{H}$  NMR (400 MHz,  $\text{CDCl}_3$ )  $\delta$  7.40-7.35 (m, 2H), 7.35-7.29 (m, 2H), 7.27-7.21 (m, 1H), 5.73-5.62 (m, 1H), 4.96-4.86 (m, 2H), 2.23-2.12 (m, 1H), 2.10-2.00 (m, 1H), 2.00-1.76 (m, 4H), 1.51-1.39 (m, 1H), 1.27-1.02 (m, 5H), 0.83-0.74 (m, 3H);  $^{13}\text{C}$  NMR (100 MHz,  $\text{CDCl}_3$ )  $\delta$  138.4, 136.9, 128.9, 127.7, 125.9, 122.3, 115.4, 48.1, 41.1, 40.3, 31.6, 29.6, 24.9, 22.3, 13.9. FT-IR:  $\nu$  ( $\text{cm}^{-1}$ ) 3064, 2930, 2862, 2361, 2343, 1642, 1449. HRMS [ESI]  $m/z$ :  $[\text{M}+\text{Na}]^+$  calcd for  $\text{C}_{17}\text{H}_{23}\text{NaN}$  264.1723; found 264.1717.

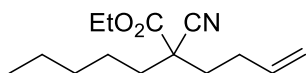

**1y:** 84% yield, yellow oil. Purification by flash column chromatography on silica gel (eluent: EtOAc/Petroleum ether = 1/10).  $^1\text{H}$  NMR (400 MHz,  $\text{CDCl}_3$ )  $\delta$  5.81-5.69 (m, 1H), 5.10-4.98 (m, 2H), 4.26 (q,  $J$  = 6.8 Hz, 2H), 2.37-2.26 (m, 1H), 2.15-1.95 (m, 2H), 1.94-1.71 (m, 3H), 1.63-1.50 (m, 1H), 1.37-1.23 (m, 8H), 0.88 (t,  $J$  = 6.4 Hz, 3H);  $^{13}\text{C}$  NMR (100 MHz,  $\text{CDCl}_3$ )  $\delta$  169.1, 136.0, 119.2, 116.2, 62.6, 49.6, 37.6, 36.6, 31.3, 29.7, 25.0, 22.3, 14.1, 13.9. FT-IR:  $\nu$  ( $\text{cm}^{-1}$ ) 2959, 2931, 2864, 2359, 2342, 1739, 1643, 1451, 1218. HRMS [ESI]  $m/z$ :  $[\text{M}+\text{Na}]^+$  calcd for  $\text{C}_{14}\text{H}_{23}\text{NaO}_2\text{N}$  260.1621; found 260.1612.

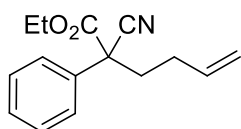

**1z:** 52% yield, yellow oil. Purification by flash column chromatography on silica gel (eluent: EtOAc/Petroleum ether = 1/5).  $^1\text{H}$  NMR (400 MHz,  $\text{CDCl}_3$ )  $\delta$  7.57-7.53 (m, 2H), 7.44-7.35 (m, 3H), 5.83-5.73 (m, 1H), 5.11-4.98 (m, 2H), 4.30-4.16 (m, 2H), 2.52-2.42 (m, 1H), 2.30-2.12 (m, 3H), 1.25 (t,  $J$  = 7.2 Hz, 3H);  $^{13}\text{C}$  NMR (100 MHz,  $\text{CDCl}_3$ )  $\delta$  167.5, 136.0, 134.5, 129.2, 128.9, 126.0, 118.3, 116.1, 63.2, 53.8, 37.3, 29.7, 13.8. FT-IR:  $\nu$  ( $\text{cm}^{-1}$ ) 3068, 2982, 2936, 2247, 1741, 1449, 1223. HRMS [ESI]  $m/z$ :  $[\text{M}+\text{Na}]^+$  calcd for  $\text{C}_{15}\text{H}_{17}\text{NaO}_2\text{N}$  266.1151; found 266.1140.

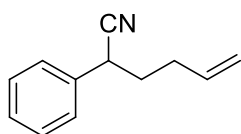

**1aa:** 43% yield, yellow oil. Purification by flash column chromatography on silica gel (eluent: EtOAc/Petroleum ether = 1/20).  $^1\text{H}$  NMR (400 MHz,  $\text{CDCl}_3$ )  $\delta$  7.42-7.36 (m, 2H), 7.36-7.30 (m, 3H), 5.84-5.73 (m, 1H), 5.15-5.05 (m, 2H), 3.81 (dd,  $J$  = 8.8, 6.4 Hz, 1H), 2.29-2.21 (m, 2H),

2.10-2.00 (m, 1H), 2.00-1.89 (m, 1H);  $^{13}\text{C}$  NMR (100 MHz,  $\text{CDCl}_3$ )  $\delta$  136.2, 135.8, 129.1, 128.1, 127.3, 120.7, 116.6, 36.5, 34.9, 31.0. FT-IR:  $\nu$  ( $\text{cm}^{-1}$ ) 3067, 3032, 2980, 2931, 2862, 2241, 1736, 1642, 1494, 1454, 1242. HRMS [ESI]  $m/z$ :  $[\text{M}+\text{Na}]^+$  calcd for  $\text{C}_{12}\text{H}_{13}\text{NaN}$  194.0940; found 194.0942.

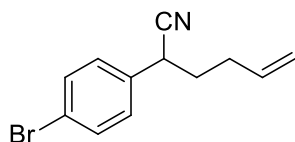

**1ab**: 47% yield, colorless oil. Purification by flash column chromatography on silica gel (eluent: EtOAc/Petroleum ether = 1/20).  $^1\text{H}$  NMR (400 MHz,  $\text{CDCl}_3$ )  $\delta$  7.53-7.49 (m, 2H), 7.23-7.18 (m, 2H), 5.82-5.71 (m, 1H), 5.14-5.05 (m, 2H), 3.77 (dd,  $J$  = 8.8, 6.4 Hz, 1H), 2.27-2.19 (m, 2H), 2.08-1.97 (m, 1H), 1.96-1.86 (m, 1H);  $^{13}\text{C}$  NMR (100 MHz,  $\text{CDCl}_3$ )  $\delta$  135.8, 134.8, 132.3, 129.0, 122.2, 120.2, 116.9, 36.0, 34.8, 30.8. FT-IR:  $\nu$  ( $\text{cm}^{-1}$ ) 3079, 3019, 2979, 2931, 2862, 2242, 1641, 1488, 1439. HRMS [ESI]  $m/z$ :  $[\text{M}+\text{Na}]^+$  calcd for  $\text{C}_{12}\text{H}_{12}\text{NaNBr}$  272.0045; found 272.0050.

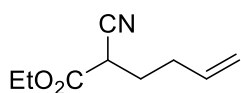

**1ac**: 42% yield, colorless oil. Purification by flash column chromatography on silica gel (eluent: EtOAc/Petroleum ether = 1/10).  $^1\text{H}$  NMR (400 MHz,  $\text{CDCl}_3$ )  $\delta$  5.79-5.68 (m, 1H), 5.15-5.04 (m, 2H), 4.24 (q,  $J$  = 7.2 Hz, 2H), 3.50 (dd,  $J$  = 8.0, 6.4 Hz, 1H), 2.35-2.18 (m, 2H), 2.10-1.96 (m, 2H), 1.30 (t,  $J$  = 7.2 Hz, 3H);  $^{13}\text{C}$  NMR (100 MHz,  $\text{CDCl}_3$ )  $\delta$  166.1, 135.3, 117.3, 116.3, 62.8, 36.7, 30.6, 28.9, 14.0. FT-IR:  $\nu$  ( $\text{cm}^{-1}$ ) 3082, 2980, 2939, 2159, 2018, 1976, 1742, 1453, 1255. HRMS [ESI]  $m/z$ :  $[\text{M}+\text{Na}]^+$  calcd for  $\text{C}_9\text{H}_{13}\text{NNaO}_2\text{S}$  190.0838; found 190.0834.

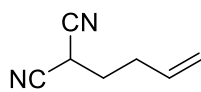

**1ad**: 36% yield, colorless oil. Purification by flash column chromatography on silica gel (eluent: EtOAc/Petroleum ether = 1/5).  $^1\text{H}$  NMR (400 MHz,  $\text{CDCl}_3$ )  $\delta$  5.78-5.66 (m, 1H), 5.20-5.11 (m, 2H), 3.76 (t,  $J$  = 7.2 Hz, 1H), 2.38-2.30 (m, 2H), 2.13-2.06 (m, 2H);  $^{13}\text{C}$  NMR (100 MHz,  $\text{CDCl}_3$ )  $\delta$  134.0, 118.5, 112.8, 30.2, 29.7, 21.7. FT-IR:  $\nu$  ( $\text{cm}^{-1}$ ) 2974, 2935, 2102, 1243. HRMS [ESI]  $m/z$ :  $[\text{M}+\text{Na}]^+$  calcd for  $\text{C}_7\text{H}_8\text{NaN}_2$  143.0580; found 143.0572.

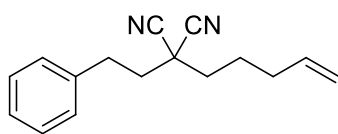

**3**: 28% yield, yellow oil. Purification by flash column chromatography on silica gel (eluent: EtOAc/Petroleum ether = 1/15).  $^1\text{H}$  NMR (400 MHz,  $\text{CDCl}_3$ )  $\delta$  7.41-7.33 (m, 2H), 7.32-7.28 (m, 1H), 7.27-7.23 (m, 2H), 5.87-5.75 (m, 1H), 5.14-5.06 (m, 2H), 3.05-2.98 (m, 2H), 2.27-2.18 (m, 4H), 2.03-1.97 (m, 2H), 1.89-1.79 (m, 2H);  $^{13}\text{C}$  NMR (100 MHz,  $\text{CDCl}_3$ )  $\delta$  138.5, 136.6, 128.9, 128.4, 127.0, 116.4, 115.4, 39.6, 37.5, 37.2, 32.6, 31.9, 24.6. FT-IR:  $\nu$  ( $\text{cm}^{-1}$ ) 2977, 2932, 2866, 2159, 2028, 1643, 1455. HRMS [ESI]  $m/z$ :  $[\text{M}+\text{Na}]^+$  calcd for  $\text{C}_{16}\text{H}_{18}\text{N}_2\text{Na}$  261.1362; found 261.1364.

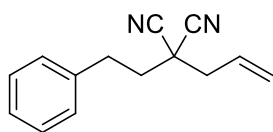

**5**: 45% yield, yellow oil. Purification by flash column chromatography on silica gel (eluent: EtOAc/Petroleum ether = 1/15).  $^1\text{H}$  NMR (400 MHz,  $\text{CDCl}_3$ )  $\delta$  7.40-7.34 (m, 2H), 7.32-7.27 (m, 1H), 7.27-7.23 (m, 2H), 6.00-5.88 (m, 1H), 5.49-5.40 (m, 2H), 3.05-2.98 (m, 2H), 2.75 (d,

$J = 7.2$  Hz, 2H), 2.26-2.19 (m, 2H);  $^{13}\text{C}$  NMR (100 MHz,  $\text{CDCl}_3$ )  $\delta$  138.5, 128.9, 128.5, 128.5, 127.0, 123.4, 115.1, 41.6, 38.8, 37.3, 31.9. FT-IR:  $\nu$  ( $\text{cm}^{-1}$ ) 2975, 2933, 2159, 2029, 1976, 1455. HRMS [ESI]  $m/z$ :  $[\text{M}+\text{Na}]^+$  calcd for  $\text{C}_{14}\text{H}_{14}\text{NaN}_2$  233.1049; found 233.1046.

## 5. Characterization of products

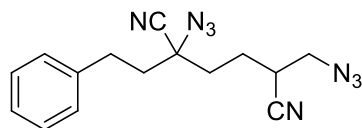

**2a:** *d.r.* = 1:1, 49.2 mg, 80%, yellow oil, Purification by flash column chromatography on silica gel (eluent: EtOAc/Petroleum ether = 1/5).  $^1\text{H}$  NMR (400 MHz,  $\text{CDCl}_3$ )  $\delta$  7.38-7.29 (m, 2H, two isomers), 7.29-7.18 (m, 3H, two isomers), 3.65-3.45 (m, 2H, two isomers), 3.96-2.76 (m, 3H, two isomers), 2.22-2.12 (m, 2H, two isomers), 2.10-1.81 (m, 4H, two isomers);  $^{13}\text{C}$  NMR (100 MHz,  $\text{CDCl}_3$ )  $\delta$  139.0 & 139.0 (overlap, two isomers), 128.9 & 128.9 (overlap, two isomers), 128.3 & 128.3 (overlap, two isomers), 126.8 & 126.8 (overlap, two isomers), 118.7 & 118.7 (two isomers), 116.9 & 116.8 (two isomers), 62.4 & 62.2 (two isomers), 51.7 & 51.6 (two isomers), 40.2 & 40.2 (two isomers), 35.4 & 35.3 (two isomers), 31.8 & 31.7 (two isomers), 30.7 & 30.7 (two isomers), 24.8 & 24.7 (two isomers). FT-IR:  $\nu$  ( $\text{cm}^{-1}$ ) 2974, 2930, 2102, 1732, 1455, 1242. HRMS [ESI]  $m/z$ :  $[\text{M}+\text{Na}]^+$  calcd for  $\text{C}_{15}\text{H}_{16}\text{NaN}_8$  331.1390; found 331.1388.

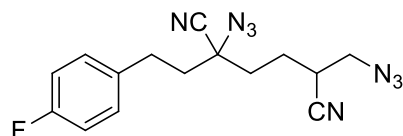

**2b:** *d.r.* = 1:1, 39.8 mg, 61%, yellow oil, Purification by flash column chromatography on silica gel (eluent: EtOAc/Petroleum ether = 1/5).  $^1\text{H}$  NMR (400 MHz,  $\text{CDCl}_3$ )  $\delta$  7.20-7.14 (m, 2H, two isomers), 7.05-6.97 (m, 2H, two isomers), 3.65-3.54 (m, 2H, two isomers), 2.92-2.78 (m, 3H, two isomers), 2.20-2.08 (m, 2H, two isomers), 2.07-1.82 (m, 4H, two isomers);  $^{13}\text{C}$  NMR (100 MHz,  $\text{CDCl}_3$ )  $\delta$  161.2 (d,  $J_{\text{C-F}} = 243.5$  Hz) (overlap, two isomers), 134.6 (d,  $J_{\text{C-F}} = 3.1$  Hz, one isomer) & 134.6 (d,  $J_{\text{C-F}} = 3.2$  Hz, one isomer), 129.8 (d,  $J_{\text{C-F}} = 7.9$  Hz) (overlap, two isomers), 118.6 & 118.6 (two isomers), 116.8 & 116.7 (two isomers), 115.7 (d,  $J_{\text{C-F}} = 21.2$  Hz) (overlap, two isomers), 62.3 & 62.1 (two isomers), 51.7 & 51.6 (two isomers), 40.4 & 40.3 (two isomers), 35.5 & 35.4 (two isomers), 31.8 & 31.7 (two isomers), 30.0 & 29.9 (two isomers), 24.9 & 24.6 (two isomers);  $^{19}\text{F}$  NMR (376 MHz,  $\text{CDCl}_3$ )  $\delta$  -116.0 (s, one isomer), -116.0 (s, one isomer). FT-IR:  $\nu$  ( $\text{cm}^{-1}$ ) 2936, 2103, 1732, 1510, 1241, 1222. HRMS [ESI]  $m/z$ :  $[\text{M}+\text{Na}]^+$  calcd for  $\text{C}_{15}\text{H}_{15}\text{FNaN}_8$  349.1296; found 349.1313.

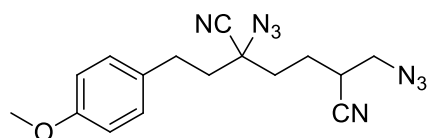

**2c:** *d.r.* = 1:1, 35.2 mg, 52%, yellow oil, Purification by flash column chromatography on silica gel (eluent: EtOAc/Petroleum ether = 1/5).  $^1\text{H}$  NMR (400 MHz,  $\text{CDCl}_3$ )  $\delta$  7.15-7.09 (m, 2H, two isomers), 6.89-6.83 (m, 2H, two isomers), 3.79 (s, 3H, two isomers), 3.61-3.53 (m, 2H, two isomers), 2.88-2.74 (m, 3H, two isomers), 2.15-2.09 (m, 2H, two isomers), 2.03-1.80 (m, 4H, two isomers);  $^{13}\text{C}$  NMR (100 MHz,  $\text{CDCl}_3$ )  $\delta$  158.5 & 158.5 (overlap, two isomers), 131.0 & 131.0 (overlap, two isomers), 129.3 & 129.3 (overlap, two isomers), 118.7 & 118.7 (two isomers), 117.0 & 116.8 (two isomers), 114.3 & 114.3 (overlap, two isomers), 62.4 & 62.2 (two isomers), 55.3 & 55.3 (overlap, two isomers), 51.7 & 51.7 (two isomers), 40.5 & 40.4 (two isomers), 35.4 & 35.3 (two isomers), 31.8 & 31.7 (two isomers), 29.9 & 29.8 (two isomers), 24.9 & 24.7 (two isomers). FT-IR:  $\nu$  ( $\text{cm}^{-1}$ )

3020, 2932, 2103, 1612, 1513, 1246. HRMS [ESI]  $m/z$ :  $[M+Na]^+$  calcd for  $C_{16}H_{18}N_8NaO$  361.1496; found 361.1476.

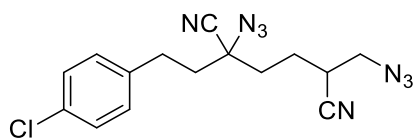

**2d:** *d.r.* = 1:1, 44.7 mg, 65%, yellow oil, Purification by flash column chromatography on silica gel (eluent: EtOAc/Petroleum ether = 1/5).  $^1H$  NMR (400 MHz,  $CDCl_3$ )  $\delta$  7.32-7.27 (m, 2H, two isomers), 7.16-7.12 (m, 2H, two isomers), 3.64-3.54 (m, 2H, two isomers), 2.89-2.80 (m, 3H, two isomers), 2.16-2.07 (m, 2H, two isomers), 2.06-1.82 (m, 4H, two isomers);  $^{13}C$  NMR (100 MHz,  $CDCl_3$ )  $\delta$  137.4 & 137.4 (overlap, two isomers), 132.6 & 132.6 (overlap, two isomers), 129.7 & 129.7 (overlap, two isomers), 129.0 & 129.0 (overlap, two isomers), 118.6 & 118.6 (two isomers), 116.8 & 116.6 (two isomers), 62.3 & 62.1 (two isomers), 51.7 & 51.6 (two isomers), 40.2 & 40.1 (two isomers), 35.5 & 35.4 (two isomers), 31.8 & 31.7 (two isomers), 30.1 & 30.0 (two isomers), 24.9 & 24.6 (two isomers). FT-IR:  $\nu$  ( $cm^{-1}$ ) 2924, 2853, 2246, 2103, 1735, 1493, 1248. HRMS [ESI]  $m/z$ :  $[M+Na]^+$  calcd for  $C_{15}H_{15}ClN_8Na$  365.1000; found 365.1001.

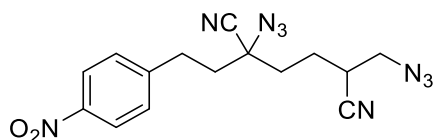

**2e:** *d.r.* = 1:1, 32.7 mg, 46%, yellow oil. Purification by flash column chromatography on silica gel (eluent: EtOAc/Petroleum ether = 1/5).  $^1H$  NMR (400 MHz,  $CDCl_3$ )  $\delta$  8.21-8.16 (m, 2H, two isomers), 7.41-7.36 (m, 2H, two isomers), 3.66-3.57 (m, 2H, two isomers), 3.06-2.93 (m, 2H, two isomers), 2.90-2.82 (m, 1H, two isomers), 2.24-2.06 (m, 3H, two isomers), 2.06-1.87 (m, 3H, two isomers);  $^{13}C$  NMR (100 MHz,  $CDCl_3$ )  $\delta$  147.0 & 147.0 (overlap, two isomers), 146.6 & 146.6 (overlap, two isomers), 129.3 & 129.3 (overlap, two isomers), 124.1 & 124.1 (overlap, two isomers), 118.6 & 118.6 (two isomers), 116.5 & 116.4 (two isomers), 62.2 & 62.1 (two isomers), 51.7 & 51.6 (two isomers), 39.6 & 39.6 (two isomers), 35.7 & 35.6 (two isomers), 31.8 & 31.7 (two isomers), 30.6 & 30.6 (two isomers), 24.9 & 24.6 (two isomers). FT-IR:  $\nu$  ( $cm^{-1}$ ) 2924, 2853, 2103, 1601, 1518, 1456, 1346, 1246. HRMS [ESI]  $m/z$ :  $[M+Na]^+$  calcd for  $C_{15}H_{15}N_9NaO_2$  376.1241; found 376.1221.

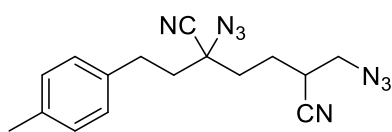

**2f:** *d.r.* = 1:1, 39.3 mg, 61%, yellow oil. Purification by flash column chromatography on silica gel (eluent: EtOAc/Petroleum ether = 1/5).  $^1H$  NMR (400 MHz,  $CDCl_3$ )  $\delta$  7.19-7.05 (m, 4H, two isomers), 3.63-3.53 (m, 2H, two isomers), 2.90-2.77 (m, 3H, two isomers), 2.34 (s, 3H, two isomers), 2.18-2.09 (m, 2H, two isomers), 2.05-1.82 (m, 4H, two isomers);  $^{13}C$  NMR (100 MHz,  $CDCl_3$ )  $\delta$  136.4 & 136.4 (overlap, two isomers), 135.9 & 135.9 (overlap, two isomers), 129.5 & 129.5 (overlap, two isomers), 128.2 & 128.2 (overlap, two isomers), 118.7 & 118.6 (two isomers), 116.9 & 116.8 (two isomers), 62.4 & 62.2 (two isomers), 51.7 & 51.7 (overlap, two isomers), 40.4 & 40.3 (two isomers), 35.4 & 35.3 (two isomers), 31.8 & 31.7 (two isomers), 30.3 & 30.2 (two isomers), 24.9 & 24.7 (two isomers), 21.0 & 21.0 (overlap, two isomers). FT-IR:  $\nu$  ( $cm^{-1}$ ) 3021, 2925, 2867, 2246, 2103, 1515, 1455, 1247. HRMS [ESI]  $m/z$ :  $[M+Na]^+$  calcd for  $C_{16}H_{18}N_8Na$  345.1547; found 345.1552.

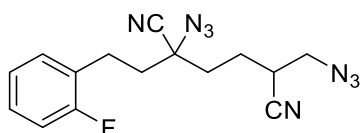

**2g:** *d.r.* = 1:1, 30.6 mg, 47%, yellow oil. Purification by flash column chromatography on silica gel (eluent: EtOAc/Petroleum

ether = 1/5).  $^1\text{H}$  NMR (400 MHz,  $\text{CDCl}_3$ )  $\delta$  7.28-7.19 (m, 2H, two isomers), 7.13-7.02 (m, 2H, two isomers), 3.65-3.55 (m, 2H, two isomers), 2.93-2.87 (m, 2H, two isomers), 2.87-2.79 (m, 1H, two isomers), 2.20-2.11 (m, 2H, two isomers), 2.08-1.87 (m, 4H, two isomers);  $^{13}\text{C}$  NMR (100 MHz,  $\text{CDCl}_3$ )  $\delta$  161.1 (d,  $J_{\text{C-F}} = 243.8$  Hz) (overlap, two isomers), 130.6 (d,  $J_{\text{C-F}} = 4.8$  Hz) (overlap, two isomers), 128.8 (d,  $J_{\text{C-F}} = 8.1$  Hz) (overlap, two isomers), 125.9 (d,  $J_{\text{C-F}} = 15.5$  Hz) (overlap, two isomers), 124.5 (d,  $J_{\text{C-F}} = 3.6$  Hz) (overlap, two isomers), 118.6 & 118.6 (two isomers), 116.8 & 116.7 (two isomers), 115.6 (d,  $J_{\text{C-F}} = 21.4$  Hz) (overlap, two isomers), 62.3 & 62.1 (two isomers), 51.7 & 51.7 (two isomers), 38.4 (d,  $J_{\text{C-F}} = 5.1$  Hz, one isomer) & 38.4 (d,  $J_{\text{C-F}} = 4.8$  Hz, one isomer), 35.2 & 35.1 (two isomers), 31.8 & 31.7 (two isomers), 24.8 & 24.6 (two isomers), 24.5 (d,  $J_{\text{C-F}} = 7.6$  Hz, one isomer) & 24.5 (d,  $J_{\text{C-F}} = 7.6$  Hz, one isomer);  $^{19}\text{F}$  NMR (376 MHz,  $\text{CDCl}_3$ )  $\delta$  -118.5 & -118.5 (overlap, two isomers). FT-IR:  $\nu$  ( $\text{cm}^{-1}$ ) 2983, 2934, 2104, 1732, 1493, 1373, 1239. HRMS [ESI]  $m/z$ :  $[\text{M}+\text{Na}]^+$  calcd for  $\text{C}_{15}\text{H}_{15}\text{FNaN}_8$  349.1296; found 349.1284.

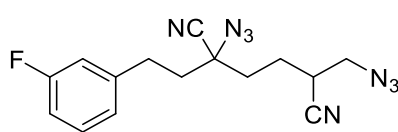

**2h:** *d.r.* = 1:1, 31.1 mg, 48%, yellow oil. Purification by flash column chromatography on silica gel (eluent: EtOAc/Petroleum ether = 1/5).  $^1\text{H}$  NMR (400 MHz,  $\text{CDCl}_3$ )  $\delta$  7.33-7.26 (m, 1H, two isomers), 7.01-6.89 (m, 3H, two isomers), 3.65-3.55 (m, 2H, two isomers), 2.94-2.79 (m, 3H, two isomers), 2.20-2.10 (m, 2H, two isomers), 2.00-1.83 (m, 4H, two isomers);  $^{13}\text{C}$  NMR (100 MHz,  $\text{CDCl}_3$ )  $\delta$  163.0 (d,  $J_{\text{C-F}} = 244.9$  Hz) (overlap, two isomers), 141.5 (d,  $J_{\text{C-F}} = 7.2$  Hz) (overlap, two isomers), 130.4 (d,  $J_{\text{C-F}} = 8.5$  Hz) (overlap, two isomers), 124.0 (d,  $J_{\text{C-F}} = 2.8$  Hz) (two isomers), 118.6 & 118.6 (two isomers), 116.7 & 116.6 (two isomers), 115.3 (d,  $J_{\text{C-F}} = 21.1$  Hz) (overlap, two isomers), 113.8 (d,  $J_{\text{C-F}} = 20.8$  Hz) (overlap, two isomers), 62.3 & 62.1 (two isomers), 51.7 & 51.6 (two isomers), 40.0 & 39.9 (two isomers), 35.5 & 35.4 (two isomers), 31.8 & 31.7 (two isomers), 30.5 (d,  $J_{\text{C-F}} = 7.8$  Hz, one isomer) & 30.4 (d,  $J_{\text{C-F}} = 7.9$  Hz, one isomer), 24.9 & 24.7 (two isomers);  $^{19}\text{F}$  NMR (376 MHz,  $\text{CDCl}_3$ )  $\delta$  -112.7 (s, one isomer), -112.7 (s, one isomer). FT-IR:  $\nu$  ( $\text{cm}^{-1}$ ) 3021, 2932, 2245, 2102, 1589, 1453, 1248. HRMS [ESI]  $m/z$ :  $[\text{M}+\text{Na}]^+$  calcd for  $\text{C}_{15}\text{H}_{15}\text{FNaN}_8$  349.1296; found 349.1307.

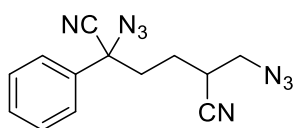

**2i:** *d.r.* = 1:1, 42.6 mg, 76%, yellow oil. Purification by flash column chromatography on silica gel (eluent: EtOAc/Petroleum ether = 1/5).  $^1\text{H}$  NMR (400 MHz,  $\text{CDCl}_3$ )  $\delta$  7.59-7.45 (m, 5H, two isomers), 3.58-3.48 (m, 2H, two isomers), 2.87-2.70 (m, 1H, two isomers), 2.35-2.02 (m, 2H, two isomers), 2.00-1.89 (m, 1H, two isomers), 1.84-1.69 (m, 1H, two isomers);  $^{13}\text{C}$  NMR (100 MHz,  $\text{CDCl}_3$ )  $\delta$  134.8 & 134.7 (two isomers), 130.4 & 130.3 (two isomers), 129.7 & 129.7 (overlap, two isomers), 125.5 & 125.5 (overlap, two isomers), 118.7 & 118.7 (two isomers), 117.0 & 116.9 (two isomers), 66.4 & 66.3 (two isomers), 51.7 & 51.6 (two isomers), 39.0 & 38.9 (two isomers), 31.7 & 31.5 (two isomers), 25.1 & 25.0 (two isomers). FT-IR:  $\nu$  ( $\text{cm}^{-1}$ ) 3021, 2932, 2245, 2099, 1492, 1224. HRMS [ESI]  $m/z$ :  $[\text{M}+\text{Na}]^+$  calcd for  $\text{C}_{13}\text{H}_{12}\text{N}_8\text{Na}$  303.1077; found 303.1079.

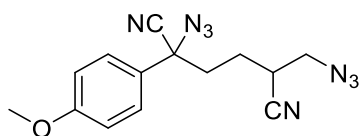

**2j:** *d.r.* = 1:1, 45.5 mg, 73%, yellow oil. Purification by flash column chromatography on silica gel (eluent: EtOAc/Petroleum ether = 1/5).  $^1\text{H}$  NMR (400 MHz,  $\text{CDCl}_3$ )  $\delta$  7.50-7.44 (m, 2H, two isomers), 7.02-6.97 (m, 2H, two isomers), 3.85 (s, 3H, two isomers).

isomers), 3.58-3.48 (m, 2H, two isomers), 2.87-2.69 (m, 1H, two isomers), 2.34-2.00 (m, 2H, two isomers), 1.99-1.86 (m, 1H, one isomer), 1.80-1.65 (m, 1H, one isomer);  $^{13}\text{C}$  NMR (100 MHz,  $\text{CDCl}_3$ )  $\delta$  160.9 & 160.9 (two isomers), 127.1 & 127.0 (two isomers), 126.5 & 126.3 (two isomers), 118.7 & 118.7 (two isomers), 117.2 & 117.2 (two isomers), 114.9 & 114.9 (two isomers), 66.1 & 65.9 (two isomers), 55.5 & 55.5 (overlap, two isomers), 51.7 & 51.6 (two isomers), 38.8 & 38.7 (two isomers), 31.7 & 31.5 (two isomers), 25.2 & 25.0 (two isomers). FT-IR:  $\nu$  ( $\text{cm}^{-1}$ ) 2932, 2362, 2331, 2102, 1512, 1256. HRMS [ESI]  $m/z$ :  $[\text{M}+\text{Na}]^+$  calcd for  $\text{C}_{14}\text{H}_{14}\text{N}_8\text{NaO}$  333.1183; found 333.1196.

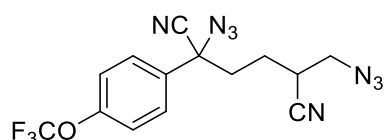

**2k:** *d.r.* = 1:1, 44.0 mg, 60%, yellow oil. Purification by flash column chromatography on silica gel (eluent: EtOAc/Petroleum ether = 1/5).  $^1\text{H}$  NMR (400 MHz,  $\text{CDCl}_3$ )  $\delta$  7.64-7.59 (m, 2H, two isomers), 7.38-7.33 (m, 2H, two isomers), 3.61-3.50 (m, 2H, two isomers), 2.88-2.73 (m, 1H, one isomer), 2.33-2.19 (m, 1H, one isomer), 2.18-2.06 (m, 1H, one isomer), 2.06-1.91 (m, 1H, one isomer), 1.86-1.71 (m, 1H, one isomer);  $^{13}\text{C}$  NMR (100 MHz,  $\text{CDCl}_3$ )  $\delta$  150.4 (q,  $J_{\text{C-F}}$  = 1.9 Hz) (overlap, two isomers), 133.6 & 133.4 (two isomers), 127.4 & 127.4 (overlap, two isomers), 121.9 & 121.9 (overlap, two isomers), 120.3 & 120.3 (q,  $J$  = 257.2 Hz) (overlap, two isomers), 118.6 & 118.5 (two isomers), 116.5 & 116.5 (two isomers), 65.8 & 65.6 (two isomers), 51.6 & 51.6 (two isomers), 39.2 & 39.0 (two isomers), 31.7 & 31.5 (two isomers), 25.1 & 25.0 (two isomers);  $^{19}\text{F}$  NMR (376 MHz,  $\text{CDCl}_3$ )  $\delta$  -57.8 (s, one isomer), -57.8 (s, one isomer). FT-IR:  $\nu$  ( $\text{cm}^{-1}$ ) 2933, 2246, 2103, 1734, 1509, 1254, 1211. HRMS [ESI]  $m/z$ :  $[\text{M}+\text{Na}]^+$  calcd for  $\text{C}_{14}\text{H}_{11}\text{F}_3\text{N}_8\text{NaO}$  387.0900; found 387.0902.

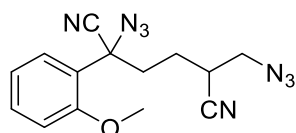

**2l:** *d.r.* = 1:1, 43.9 mg, 71%, yellow oil. Purification by flash column chromatography on silica gel (eluent: EtOAc/Petroleum ether = 1/5).  $^1\text{H}$  NMR (400 MHz,  $\text{CDCl}_3$ )  $\delta$  7.51-7.41 (m, 2H, two isomers), 7.09-7.01 (m, 2H, two isomers), 3.95 (s, 3H, two isomers), 3.56-3.47 (m, 2H, two isomers), 2.82-2.71 (m, 1H, two isomers), 2.56-2.20 (m, 2H, two isomers), 1.88-1.72 (m, 2H, two isomers);  $^{13}\text{C}$  NMR (100 MHz,  $\text{CDCl}_3$ )  $\delta$  156.4 & 156.3 (two isomers), 131.6 & 131.6 (two isomers), 127.1 & 126.9 (two isomers), 122.2 & 122.0 (two isomers), 121.3 & 121.3 (two isomers), 118.9 & 118.8 (two isomers), 116.9 & 116.9 (overlap, two isomers), 112.5 & 112.5 (overlap, two isomers), 64.0 & 63.7 (two isomers), 55.9 & 55.9 (overlap, two isomers), 51.7 & 51.7 (two isomers), 35.3 & 35.2 (two isomers), 31.8 & 31.6 (two isomers), 24.9 & 24.7 (two isomers). FT-IR:  $\nu$  ( $\text{cm}^{-1}$ ) 2926, 2846, 2360, 2244, 2103, 1490, 1252. HRMS [ESI]  $m/z$ :  $[\text{M}+\text{Na}]^+$  calcd for  $\text{C}_{14}\text{H}_{14}\text{N}_8\text{NaO}$  333.1183; found 333.1200.

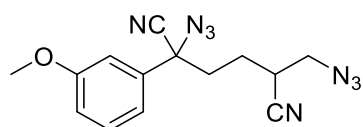

**2m:** *d.r.* = 1:1, 46.1 mg, 74%, yellow solid. Purification by flash column chromatography on silica gel (eluent: EtOAc/Petroleum ether = 1/5).  $^1\text{H}$  NMR (400 MHz,  $\text{CDCl}_3$ )  $\delta$  7.44-7.38 (m, 1H, two isomers), 7.15-7.11 (m, 1H, two isomers), 7.07-7.04 (m, 1H, two isomers), 7.01-6.97 (m, 1H, two isomers), 3.86 (s, 3H, two isomers), 3.58-3.48 (m, 2H, two isomers), 2.85-2.69 (m, 1H, two isomers), 2.33-2.02 (m, 2H, two isomers), 1.99-1.87 (m, 1H, two isomers), 1.83-1.67 (m, 1H, two isomers);  $^{13}\text{C}$  NMR (100 MHz,  $\text{CDCl}_3$ )  $\delta$  160.4 & 160.4 (two isomers), 136.2 & 136.1 (two isomers), 130.8 & 130.8 (two isomers), 118.7 &

118.7 (two isomers), 117.6 & 117.6 (two isomers), 116.9 & 116.9 (two isomers), 115.5 & 115.4 (two isomers), 111.5 & 111.5 (two isomers), 66.3 & 66.2 (two isomers), 55.5 & 55.5 (overlap, two isomers), 51.7 & 51.6 (two isomers), 38.9 & 38.8 (two isomers), 31.7 & 31.5 (two isomers), 25.1 & 24.9 (two isomers). FT-IR:  $\nu$  (cm<sup>-1</sup>) 3021, 2939, 2245, 2104, 1735, 1261, 1225. HRMS [ESI]  $m/z$ : [M+Na]<sup>+</sup> calcd for C<sub>14</sub>H<sub>14</sub>N<sub>8</sub>NaO 333.1183; found 333.1197.

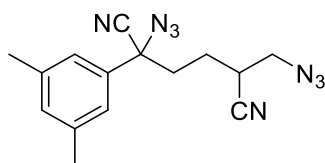

**2n:** *d.r.* = 1:1, 35.8 mg, 58%, yellow oil. Purification by flash column chromatography on silica gel (eluent: EtOAc/Petroleum ether = 1/5). <sup>1</sup>H NMR (400 MHz, CDCl<sub>3</sub>)  $\delta$  7.14 (s, 2H, two isomers), 7.09 (s, 1H, two isomers), 3.58-3.49 (m, 2H, two isomers), 2.86-2.68 (m, 1H, two isomers), 2.38 (s, 6H, two isomers), 2.32-2.00 (m, 2H, two isomers), 2.00-1.88 (m, 1H, one isomer), 1.83-1.69 (m, 1H, one isomer); <sup>13</sup>C NMR (100 MHz, CDCl<sub>3</sub>)  $\delta$  139.5 & 139.5 (overlap, two isomers), 134.6 & 134.5 (two isomers), 132.0 & 131.9 (two isomers), 123.2 & 123.2 (overlap, two isomers), 118.7 & 118.7 (two isomers), 117.2 & 117.1 (two isomers), 66.4 & 66.3 (two isomers), 51.7 & 51.6 (two isomers), 38.9 & 38.8 (two isomers), 31.7 & 31.6 (two isomers), 25.2 & 25.0 (two isomers), 21.4 & 21.4 (overlap, two isomers). FT-IR:  $\nu$  (cm<sup>-1</sup>) 3020, 2924, 2247, 2104, 1609, 1455, 1219. HRMS [ESI]  $m/z$ : [M+Na]<sup>+</sup> calcd for C<sub>15</sub>H<sub>16</sub>N<sub>8</sub>Na 331.1390; found 331.1405.

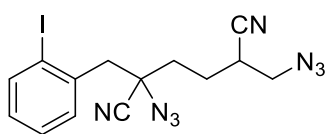

**2o:** *d.r.* = 1:1, 55.6 mg, 66%, yellow solid. Purification by flash column chromatography on silica gel (eluent: EtOAc/Petroleum ether = 1/5). <sup>1</sup>H NMR (400 MHz, CDCl<sub>3</sub>)  $\delta$  7.93 (dd, *J* = 7.6, 0.4 Hz, 1H, two isomers), 7.49 (dd, *J* = 7.6, 0.4 Hz, 1H, two isomers), 7.39 (ddd, *J* = 7.6, 7.6, 0.8 Hz, 1H, two isomers), 7.05 (ddd, *J* = 7.6, 7.6, 1.2 Hz, 1H, two isomers), 3.62-3.53 (m, 2H, two isomers), 3.42 (s, 2H, two isomers), 2.90-2.78 (m, 1H, two isomers), 2.21-1.86 (m, 4H, two isomers); <sup>13</sup>C NMR (100 MHz, CDCl<sub>3</sub>)  $\delta$  140.5 & 140.5 (overlap, two isomers), 135.7 & 135.6 (two isomers), 131.3 & 131.3 (two isomers), 130.2 & 130.2 (overlap, two isomers), 128.9 & 128.9 (overlap, two isomers), 118.7 & 118.6 (two isomers), 116.4 & 116.2 (two isomers), 102.6 & 102.6 (overlap, two isomers), 63.4 & 63.3 (two isomers), 51.7 & 51.7 (overlap, two isomers), 48.1 & 48.0 (two isomers), 35.7 & 35.6 (two isomers), 31.8 & 31.7 (two isomers), 25.1 & 25.0 (two isomers). FT-IR:  $\nu$  (cm<sup>-1</sup>) 2977, 2935, 2361, 2106, 1732, 1243. HRMS [ESI]  $m/z$ : [M+Na]<sup>+</sup> calcd for C<sub>14</sub>H<sub>13</sub>N<sub>8</sub>NaI 443.0200; found 443.0202.

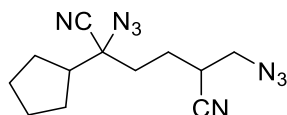

**2p:** *d.r.* = 1:1, 34.2 mg, 63%, yellow oil. Purification by flash column chromatography on silica gel (eluent: EtOAc/Petroleum ether = 1/5). <sup>1</sup>H NMR (400 MHz, CDCl<sub>3</sub>)  $\delta$  3.64-3.54 (m, 2H, two isomers), 2.92-2.76 (m, 1H, two isomers), 2.76-2.54 (m, 1H, two isomers), 2.34-2.22 (m, 1H, two isomers), 2.15-1.85 (m, 5H, two isomers), 1.85-1.68 (m, 3H, two isomers), 1.68-1.55 (m, 3H, two isomers); <sup>13</sup>C NMR (100 MHz, CDCl<sub>3</sub>)  $\delta$  118.7 & 118.7 (two isomers), 116.5 & 116.4 (two isomers), 66.5 & 66.5 (overlap, two isomers), 51.7 & 51.7 (two isomers), 48.4 & 48.4 (overlap, two isomers), 35.1 & 34.9 (two isomers), 31.9 & 31.9 (two isomers), 28.8 & 28.8 (two isomers), 28.1 & 27.9 (two isomers), 25.4 & 25.3 (two isomers), 25.2 & 25.2 (two isomers), 25.0 & 24.8 (two isomers). FT-IR:  $\nu$  (cm<sup>-1</sup>) 3649, 2972, 2253, 2109, 1717, 1259. HRMS [ESI]  $m/z$ : [M+Na]<sup>+</sup> calcd for C<sub>12</sub>H<sub>16</sub>N<sub>8</sub>Na 295.1390; found 295.1390.

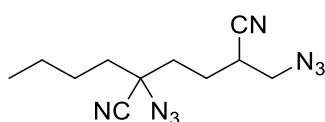

**2q:** *d.r.* = 1:1, 33.1 mg, 64%, yellow oil. Purification by flash column chromatography on silica gel (eluent: EtOAc/Petroleum ether = 1/5).  $^1\text{H}$  NMR (400 MHz,  $\text{CDCl}_3$ )  $\delta$  3.64-3.53 (m, 2H, two isomers), 2.91-2.75 (m, 1H, two isomers), 2.12-1.70 (m, 6H, two isomers), 1.60-1.47 (m, 2H, two isomers), 1.47-1.35 (m, 2H, two isomers), 0.96 (t,  $J$  = 7.2 Hz, 3H, two isomers);  $^{13}\text{C}$  NMR (100 MHz,  $\text{CDCl}_3$ )  $\delta$  118.7 & 118.7 (two isomers), 117.2 & 117.1 (two isomers), 62.6 & 62.4 (two isomers), 51.7 & 51.7 (two isomers), 38.2 & 38.2 (overlap, two isomers), 35.2 & 35.1 (two isomers), 31.8 & 31.8 (two isomers), 26.4 & 26.3 (two isomers), 24.9 & 24.7 (two isomers), 22.3 & 22.3 (overlap, two isomers), 13.8 & 13.8 (overlap, two isomers). FT-IR:  $\nu$  ( $\text{cm}^{-1}$ ) 2969, 2922, 2361, 2104, 1497, 1259. HRMS [ESI]  $m/z$ :  $[\text{M}+\text{Na}]^+$  calcd for  $\text{C}_{11}\text{H}_{16}\text{N}_8\text{Na}$  283.1390; found 283.1389.

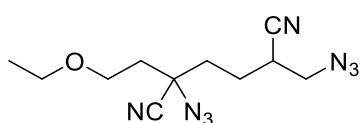

**2r:** *d.r.* = 1:1, 24.3 mg, 44%, yellow oil. Purification by flash column chromatography on silica gel (eluent: EtOAc/Petroleum ether = 1/5).  $^1\text{H}$  NMR (400 MHz,  $\text{CDCl}_3$ )  $\delta$  3.66 (t,  $J$  = 6.0 Hz, 2H, two isomers), 3.63-3.54 (m, 2H, two isomers), 3.51 (q,  $J$  = 7.2 Hz, 2H, two isomers), 2.87-2.77 (m, 1H, two isomers), 2.23-1.80 (m, 6H, two isomers), 1.22 (t,  $J$  = 7.2 Hz, 3H, two isomers);  $^{13}\text{C}$  NMR (100 MHz,  $\text{CDCl}_3$ )  $\delta$  118.7 & 118.7 (two isomers), 117.0 & 116.9 (two isomers), 66.8 & 66.8 (overlap, two isomers), 65.4 & 65.4 (two isomers), 61.5 & 61.3 (two isomers), 51.8 & 51.8 (two isomers), 38.0 & 38.0 (overlap, two isomers), 35.9 & 35.8 (two isomers), 31.8 & 31.8 (two isomers), 24.8 & 24.6 (two isomers), 15.0 & 15.0 (overlap, two isomers). FT-IR:  $\nu$  ( $\text{cm}^{-1}$ ) 2923, 2851, 2358, 2148, 1459, 1261. HRMS [ESI]  $m/z$ :  $[\text{M}+\text{Na}]^+$  calcd for  $\text{C}_{11}\text{H}_{16}\text{N}_8\text{NaO}$  299.1339; found 299.1349.

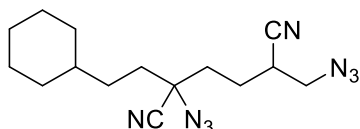

**2s:** *d.r.* = 1:1, 45.9 mg, 73%, yellow oil. Purification by flash column chromatography on silica gel (eluent: EtOAc/Petroleum ether = 1/5).  $^1\text{H}$  NMR (400 MHz,  $\text{CDCl}_3$ )  $\delta$  3.64-3.54 (m, 2H, two isomers), 2.90-2.70 (m, 1H, two isomers), 2.00-1.84 (m, 5H, two isomers), 1.83-1.62 (m, 6H, two isomers), 1.50-1.35 (m, 2H, two isomers), 1.33-1.09 (m, 5H, two isomers), 1.02-0.85 (m, 1H, two isomers);  $^{13}\text{C}$  NMR (100 MHz,  $\text{CDCl}_3$ )  $\delta$  118.7 & 118.7 (two isomers), 117.2 & 117.1 (two isomers), 62.8 & 62.6 (two isomers), 51.7 & 51.7 (two isomers), 37.4 & 37.4 (overlap, two isomers), 36.0 & 36.0 (overlap, two isomers), 35.1 & 35.0 (two isomers), 33.1 & 33.1 (two isomers), 31.8 & 31.8 (two isomers), 31.6 & 31.5 (two isomers), 26.4 & 26.4 (overlap, two isomers), 26.1 & 26.1 (overlap, two isomers), 24.9 & 24.6 (two isomers). FT-IR:  $\nu$  ( $\text{cm}^{-1}$ ) 2975, 2925, 2362, 2103, 1734, 1489, 1245. HRMS [ESI]  $m/z$ :  $[\text{M}+\text{Na}]^+$  calcd for  $\text{C}_{15}\text{H}_{22}\text{N}_8\text{Na}$  337.1860; found 337.1852.

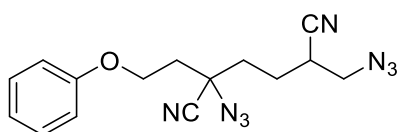

**2t:** *d.r.* = 1:1, 44.7 mg, 70%, yellow oil. Purification by flash column chromatography on silica gel (eluent: EtOAc/Petroleum ether = 1/5).  $^1\text{H}$  NMR (400 MHz,  $\text{CDCl}_3$ )  $\delta$  7.35-7.28 (m, 2H, two isomers), 7.03-6.98 (m, 1H, two isomers), 6.95-6.90 (m, 2H, two isomers), 4.29-4.19 (m, 2H, two isomers), 3.64-3.54 (m, 2H, two isomers), 2.88-2.79 (m, 1H, two isomers), 2.46-2.30 (m, 2H, two isomers), 2.30-2.10 (m, 1H, two isomers).

isomers), 2.04-1.91 (m, 3H, two isomers);  $^{13}\text{C}$  NMR (100 MHz,  $\text{CDCl}_3$ )  $\delta$  157.8 & 157.8 (overlap, two isomers), 129.7 & 129.7 (overlap, two isomers), 121.6 & 121.6 (overlap, two isomers), 118.7 & 118.7 (overlap, two isomers), 116.8 & 116.7 (two isomers), 114.5 & 114.5 (overlap, two isomers), 62.7 & 62.7 (two isomers), 61.2 & 61.0 (two isomers), 51.7 & 51.7 (overlap, two isomers), 37.5 & 37.4 (two isomers), 35.9 & 35.8 (two isomers), 31.8 & 31.8 (two isomers), 24.8 & 24.7 (two isomers). FT-IR:  $\nu$  ( $\text{cm}^{-1}$ ) 2979, 2937, 2341, 2104, 1732, 1239. HRMS [ESI]  $m/z$ :  $[\text{M}+\text{Na}]^+$  calcd for  $\text{C}_{15}\text{H}_{16}\text{N}_8\text{NaO}$  347.1339; found 347.1322.

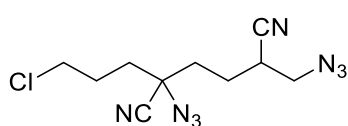

**2u:** *d.r.* = 1:1, 48.1 mg, 86%, yellow oil. Purification by flash column chromatography on silica gel (eluent: EtOAc/Petroleum ether = 1/5).  $^1\text{H}$  NMR (400 MHz,  $\text{CDCl}_3$ )  $\delta$  3.66-3.55 (m, 3H, two isomers), 3.51-3.44 (m, 1H, two isomers), 2.88-2.80 (m, 1H, two isomers), 2.20-1.99 (m, 5H, two isomers), 1.99-1.81 (m, 3H, two isomers);  $^{13}\text{C}$  NMR (100 MHz,  $\text{CDCl}_3$ )  $\delta$  118.6 & 118.6 (two isomers), 116.7 & 116.6 (two isomers), 62.1 & 61.9 (two isomers), 51.7 & 51.6 (two isomers), 43.6 & 43.6 (overlap, two isomers), 35.8 & 35.8 (two isomers), 35.5 & 35.3 (two isomers), 31.8 & 31.7 (two isomers), 27.3 & 27.2 (two isomers), 24.8 & 24.6 (two isomers). FT-IR:  $\nu$  ( $\text{cm}^{-1}$ ) 2983, 2938, 2106, 1733, 1240. HRMS [ESI]  $m/z$ :  $[\text{M}+\text{Na}]^+$  calcd for  $\text{C}_{10}\text{H}_{14}\text{ClN}_8$  281.1024; found 281.1015.

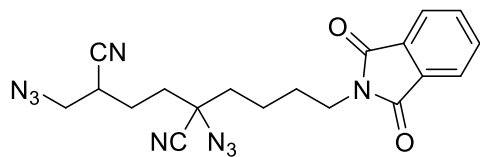

**2v:** *d.r.* = 1:1, 72.8 mg, 90%, yellow oil. Purification by flash column chromatography on silica gel (eluent: EtOAc/Petroleum ether = 1/5).  $^1\text{H}$  NMR (400 MHz,  $\text{CDCl}_3$ )  $\delta$  7.86-7.83 (m, 2H), 7.73-7.71 (m, 2H), 3.72 (t,  $J$  = 6.8 Hz, 2H), 3.59 (dd,  $J$  = 6.4, 2.8 Hz, 2H), 2.86-2.82 (m, 1H), 1.98-1.89 (m, 5H), 1.81-1.75 (m, 3H), 1.63-1.56 (m, 2H);  $^{13}\text{C}$  NMR (100 MHz,  $\text{CDCl}_3$ )  $\delta$  168.4 & 168.4 (overlap, two isomers), 134.1 & 134.1 (overlap, two isomers), 132.0 & 132.0 (overlap, two isomers), 123.4 & 123.4 (overlap, two isomers), 118.7 & 118.6 (two isomers), 117.0 & 116.9 (two isomers), 62.4 & 62.3 (two isomers), 51.7 & 51.7 (overlap, two isomers), 37.7 & 37.6 (two isomers), 37.0 & 37.0 (overlap, two isomers), 35.2 & 35.0 (two isomers), 31.8 & 31.8 (two isomers), 28.0 & 28.0 (overlap, two isomers), 24.8 & 24.6 (two isomers), 21.4 & 21.3 (two isomers). FT-IR:  $\nu$  ( $\text{cm}^{-1}$ ) 3021, 2939, 2869, 2104, 1771, 1706, 1438. HRMS [ESI]  $m/z$ :  $[\text{M}+\text{Na}]^+$  calcd for  $\text{C}_{19}\text{H}_{19}\text{N}_9\text{NaO}_2$  428.1554; found 428.1571.

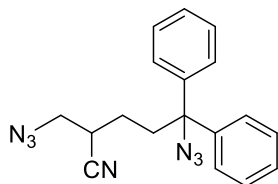

**2w:** 41.5 mg, 63%, yellow oil. Purification by flash column chromatography on silica gel (eluent: EtOAc/Petroleum ether = 1/5).  $^1\text{H}$  NMR (400 MHz,  $\text{CDCl}_3$ )  $\delta$  7.40-7.34 (m, 4H), 7.34-7.28 (m, 6H), 3.50-3.39 (m, 2H), 2.74-2.62 (m, 2H), 2.53-2.44 (m, 1H), 1.61-1.50 (m, 2H);  $^{13}\text{C}$  NMR (100 MHz,  $\text{CDCl}_3$ )  $\delta$  142.0, 141.8, 128.7, 128.0, 128.0, 127.0, 126.9, 119.4, 72.0, 51.9, 36.3, 32.3, 24.7. FT-IR:  $\nu$  ( $\text{cm}^{-1}$ ) 3060, 2933, 2244, 2097, 1773, 1493, 1447, 1252. HRMS [ESI]  $m/z$ :  $[\text{M}+\text{Na}]^+$  calcd for  $\text{C}_{18}\text{H}_{17}\text{N}_7\text{Na}$  354.1438; found 354.1441.

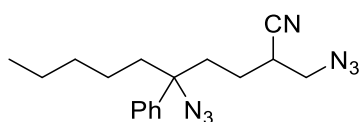

**2x:** *d.r.* = 1:1, 36.4 mg, 56%, yellow solid. Purification by flash column chromatography on silica gel (eluent: EtOAc/Petroleum ether = 1/5).

ether = 1/5).  $^1\text{H}$  NMR (400 MHz,  $\text{CDCl}_3$ )  $\delta$  7.44-7.26 (m, 5H, two isomers), 3.50-3.36 (m, 2H, two isomers), 2.78-2.48 (m, 1H, two isomers), 2.26-2.12 (m, 1H, two isomers), 2.06-1.88 (m, 2H, two isomers), 1.74-1.56 (m, 1H, two isomers), 1.44-1.20 (m, 7H, two isomers), 1.14-1.00 (m, 1H, two isomers), 0.84 (t,  $J$  = 6.8 Hz, 3H, two isomers);  $^{13}\text{C}$  NMR (100 MHz,  $\text{CDCl}_3$ )  $\delta$  140.5 & 140.5 (overlap, two isomers), 128.7 & 128.7 (overlap, two isomers), 127.5 & 127.4 (two isomers), 125.7 & 125.7 (overlap, two isomers), 119.3 & 119.3 (overlap, two isomers), 69.6 & 69.4 (two isomers), 51.9 & 51.7 (two isomers), 40.3 & 40.0 (two isomers), 37.5 & 37.3 (two isomers), 32.3 & 32.1 (two isomers), 31.8 & 31.8 (overlap, two isomers), 24.4 & 24.3 (two isomers), 23.4 & 23.4 (overlap, two isomers), 22.4 & 22.4 (overlap, two isomers), 13.9 & 13.9 (overlap, two isomers). FT-IR:  $\nu$  ( $\text{cm}^{-1}$ ) 2932, 2872, 2099, 1976, 1375, 1259. HRMS [ESI]  $m/z$ :  $[\text{M}+\text{Na}]^+$  calcd for  $\text{C}_{17}\text{H}_{23}\text{N}_7\text{Na}$  348.1907; found 348.1898.

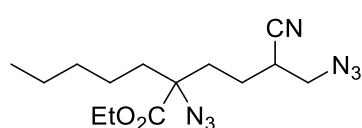

**2y:** *d.r.* = 1:1, 47.8 mg, 75%, yellow oil. Purification by flash column chromatography on silica gel (eluent: EtOAc/Petroleum ether = 1/5).  $^1\text{H}$  NMR (400 MHz,  $\text{CDCl}_3$ )  $\delta$  4.26 (q,  $J$  = 7.2 Hz, 2H, two isomers), 3.58-3.47 (m, 2H, two isomers), 2.81-2.70 (m, 1H, two isomers), 2.12-1.54 (m, 6H, two isomers), 1.45-1.20 (m, 9H, two isomers), 0.89 (t,  $J$  = 6.0 Hz, 3H, two isomers);  $^{13}\text{C}$  NMR (100 MHz,  $\text{CDCl}_3$ )  $\delta$  171.6 & 171.5 (two isomers), 119.2 & 119.2 (two isomers), 69.3 & 69.0 (two isomers), 62.2 & 62.2 (overlap, two isomers), 51.8 & 51.7 (two isomers), 37.1 & 36.8 (two isomers), 33.4 & 33.2 (two isomers), 32.2 & 32.1 (two isomers), 31.7 & 31.7 (overlap, two isomers), 24.6 & 24.4 (two isomers), 23.5 & 23.5 (two isomers), 22.3 & 22.3 (overlap, two isomers), 14.2 & 14.2 (overlap, two isomers), 13.9 & 13.9 (overlap, two isomers). FT-IR:  $\nu$  ( $\text{cm}^{-1}$ ) 2962, 2935, 2105, 1976, 1733, 1456, 1259. HRMS [ESI]  $m/z$ :  $[\text{M}+\text{Na}]^+$  calcd for  $\text{C}_{14}\text{H}_{23}\text{N}_7\text{NaO}_2$  344.1805; found 344.1817.

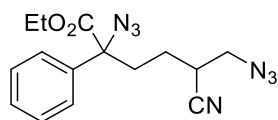

**2z:** *d.r.* = 1:1, 57.5 mg, 88%, yellow oil. Purification by flash column chromatography on silica gel (eluent: EtOAc/Petroleum ether = 1/5).  $^1\text{H}$  NMR (400 MHz,  $\text{CDCl}_3$ )  $\delta$  7.46-7.34 (m, 5H, two isomers), 4.37-4.28 (m, 2H, two isomers), 3.54-3.44 (m, 2H, two isomers), 2.78-2.69 (m, 1H, two isomers), 2.41-2.04 (m, 2H, two isomers), 1.78-1.59 (m, 2H, two isomers), 1.32 (t,  $J$  = 7.2 Hz, 3H, one isomer), 1.31 (t,  $J$  = 7.2 Hz, 3H, one isomer);  $^{13}\text{C}$  NMR (100 MHz,  $\text{CDCl}_3$ )  $\delta$  170.6 & 170.6 (two isomers), 137.4 & 137.3 (two isomers), 129.2 & 129.2 (overlap, two isomers), 128.9 & 128.9 (two isomers), 125.5 & 125.5 (overlap, two isomers), 119.2 & 119.2 (two isomers), 72.4 & 72.3 (two isomers), 62.7 & 62.7 (overlap, two isomers), 51.8 & 51.7 (two isomers), 36.0 & 36.0 (two isomers), 32.1 & 32.1 (two isomers), 24.7 & 24.6 (two isomers), 14.1 & 14.1 (overlap, two isomers). FT-IR:  $\nu$  ( $\text{cm}^{-1}$ ) 2983, 2938, 2244, 2106, 1733, 1448, 1241. HRMS [ESI]  $m/z$ :  $[\text{M}+\text{Na}]^+$  calcd for  $\text{C}_{15}\text{H}_{17}\text{N}_7\text{O}_2\text{Na}$  350.1336; found 350.1347.

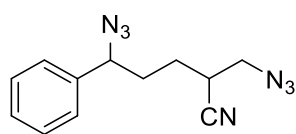

**2aa:** *d.r.* = 1:1, 27.6 mg, 54%, yellow oil. Purification by flash column chromatography on silica gel (eluent: EtOAc/Petroleum ether = 1/5).  $^1\text{H}$  NMR (400 MHz,  $\text{CDCl}_3$ )  $\delta$  7.48-7.35 (m, 3H, two isomers), 7.35-7.29 (m, 2H, two isomers), 4.50 (dt,  $J$  = 8.0, 5.6 Hz, 1H, two isomers), 3.56-3.45 (m, 2H, two isomers), 2.80-2.71 (m, 1H, two isomers), 2.10-1.75 (m, 3H, two isomers), 1.71-1.60 (m, 1H, two isomers);  $^{13}\text{C}$  NMR (100 MHz,  $\text{CDCl}_3$ )  $\delta$  138.6 & 138.6 (overlap,

two isomers), 129.1 & 129.1 (overlap, two isomers), 128.8 & 128.7 (two isomers), 126.8 & 126.8 (overlap, two isomers), 119.3 & 119.2 (two isomers), 65.7 & 65.3 (two isomers), 51.9 & 51.8 (two isomers), 33.6 & 33.4 (two isomers), 32.1 & 31.9 (two isomers), 26.6 & 26.2 (two isomers). FT-IR:  $\nu$  (cm<sup>-1</sup>) 3024, 2933, 2356, 2245, 2095, 1741, 1454, 1246. HRMS [ESI]  $m/z$ : [M+Na]<sup>+</sup> calcd for C<sub>12</sub>H<sub>13</sub>N<sub>7</sub>Na 278.1125; found 278.1130.

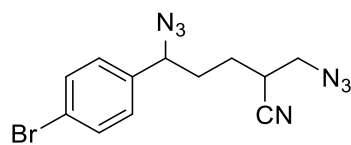

**2ab:** *d.r.* = 1:1, 28.6 mg, 43%, yellow oil. Purification by flash column chromatography on silica gel (eluent: EtOAc/Petroleum ether = 1/5). <sup>1</sup>H NMR (400 MHz, CDCl<sub>3</sub>)  $\delta$  7.56-7.52 (m, 2H), 7.21-7.17 (m, 2H), 4.51-4.44 (m, 1H), 3.54-3.47 (m, 2H), 2.79-2.73 (m, 1H), 2.04-1.76 (m, 3H), 1.69-1.61 (m, 1H); <sup>13</sup>C NMR (100 MHz, CDCl<sub>3</sub>)  $\delta$  137.7 & 137.7 (overlap, two isomers), 132.3 & 132.3 (overlap, two isomers), 128.4 & 128.4 (overlap, two isomers), 122.7 & 122.7 (two isomers), 119.2 & 119.1 (two isomers), 65.1 & 64.7 (two isomers), 51.8 & 51.7 (two isomers), 33.6 & 33.4 (two isomers), 32.1 & 31.8 (two isomers), 26.5 & 26.0 (two isomers). FT-IR:  $\nu$  (cm<sup>-1</sup>) 2929, 2095, 1507, 1455, 1245. HRMS [ESI]  $m/z$ : [M+Na]<sup>+</sup> calcd for C<sub>12</sub>H<sub>12</sub>N<sub>7</sub>NaBr 356.0230; found 356.0214.

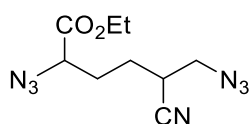

**2ac:** *d.r.* = 1:1, 20.8 mg, 41%, yellow oil. Purification by flash column chromatography on silica gel (eluent: EtOAc/Petroleum ether = 1/5). <sup>1</sup>H NMR (400 MHz, CDCl<sub>3</sub>)  $\delta$  4.28 (q, *J* = 7.2 Hz, 2H, two isomers), 4.02-3.94 (m, 1H, two isomers), 3.60-3.50 (m, 2H, two isomers), 2.85-2.75 (m, 1H, two isomers), 2.15-1.84 (m, 2H, two isomers), 1.84-1.70 (m, 2H, two isomers), 1.33 (t, *J* = 7.2 Hz, 3H, two isomers); <sup>13</sup>C NMR (100 MHz, CDCl<sub>3</sub>)  $\delta$  169.6 & 169.6 (two isomers), 119.1 & 119.0 (two isomers), 62.3 & 62.3 (overlap, two isomers), 61.4 & 61.1 (two isomers), 51.8 & 51.7 (two isomers), 32.0 & 31.8 (two isomers), 28.6 & 28.4 (two isomers), 26.0 & 25.6 (two isomers), 14.2 & 14.2 (overlap, two isomers). FT-IR:  $\nu$  (cm<sup>-1</sup>) 2920, 2851, 2362, 2335, 2104, 1736, 1647, 1260. HRMS [ESI]  $m/z$ : [M+Na]<sup>+</sup> calcd for C<sub>9</sub>H<sub>13</sub>N<sub>7</sub>NaO<sub>2</sub> 274.1023; found 274.1037.

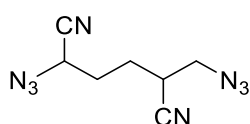

**2ad:** *d.r.* = 1:1, 22.9 mg, 56%, yellow oil. Purification by flash column chromatography on silica gel (eluent: EtOAc/Petroleum ether = 1/5). <sup>1</sup>H NMR (400 MHz, CDCl<sub>3</sub>)  $\delta$  4.41-4.36 (m, 1H, two isomers), 3.64-3.54 (m, 2H, two isomers), 2.88-2.79 (m, 1H, two isomers), 2.18-2.07 (m, 1H, two isomers), 2.04-1.93 (m, 1H, two isomers), 1.93-1.85 (m, 2H, two isomers); <sup>13</sup>C NMR (100 MHz, CDCl<sub>3</sub>)  $\delta$  118.6 & 118.6 (overlap, two isomers), 115.4 & 115.4 (overlap, two isomers), 51.6 & 51.6 (overlap, two isomers), 50.5 & 50.4 (two isomers), 31.6 & 31.6 (two isomers), 30.1 & 30.0 (two isomers), 25.3 & 25.2 (two isomers). FT-IR:  $\nu$  (cm<sup>-1</sup>) 2974, 2935, 2361, 2102, 1419, 1243. HRMS [ESI]  $m/z$ : [M+Na]<sup>+</sup> calcd for C<sub>7</sub>H<sub>7</sub>N<sub>8</sub>Na 227.0764; found 227.0772.

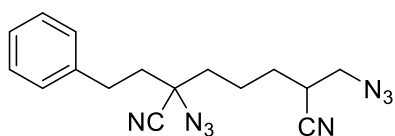

**4:** *d.r.* = 1:1, 28.0 mg, 44%, yellow oil. Purification by flash column chromatography on silica gel (eluent: EtOAc/Petroleum ether = 1/5). <sup>1</sup>H NMR (400 MHz, CDCl<sub>3</sub>)  $\delta$  7.36-7.29 (m, 2H, two isomers), 7.26-7.17 (m, 3H, two isomers), 3.61-3.51 (m, 2H, two isomers), 2.93-2.72 (m, 3H, two isomers), 2.18-2.05 (m, 2H, two isomers), 1.96-1.78 (m, 3H, two isomers), 1.78-1.64 (m, 3H, two isomers); <sup>13</sup>C NMR (100 MHz,

CDCl<sub>3</sub>)  $\delta$  139.3 & 139.3 (overlap, two isomers), 128.8 & 128.8 (overlap, two isomers), 128.4 & 128.4 (overlap, two isomers), 126.7 & 126.7 (overlap, two isomers), 119.1 & 119.1 (overlap, two isomers), 117.3 & 117.3 (overlap, two isomers), 62.6 & 62.6 (two isomers), 51.7 & 51.7 (two isomers), 40.1 & 40.0 (two isomers), 37.5 & 37.5 (two isomers), 32.1 & 32.1 (two isomers), 30.8 & 30.8 (overlap, two isomers), 29.0 & 29.0 (overlap, two isomers), 22.0 & 21.9 (two isomers). FT-IR:  $\nu$  (cm<sup>-1</sup>) 2975, 2933, 2361, 2103, 1976, 1497, 1258. HRMS [ESI]  $m/z$ : [M+Na]<sup>+</sup> calcd for C<sub>16</sub>H<sub>18</sub>N<sub>8</sub>Na 345.1547; found 345.1541.

## 6. <sup>1</sup>H, <sup>13</sup>C, <sup>19</sup>F NMR spectra

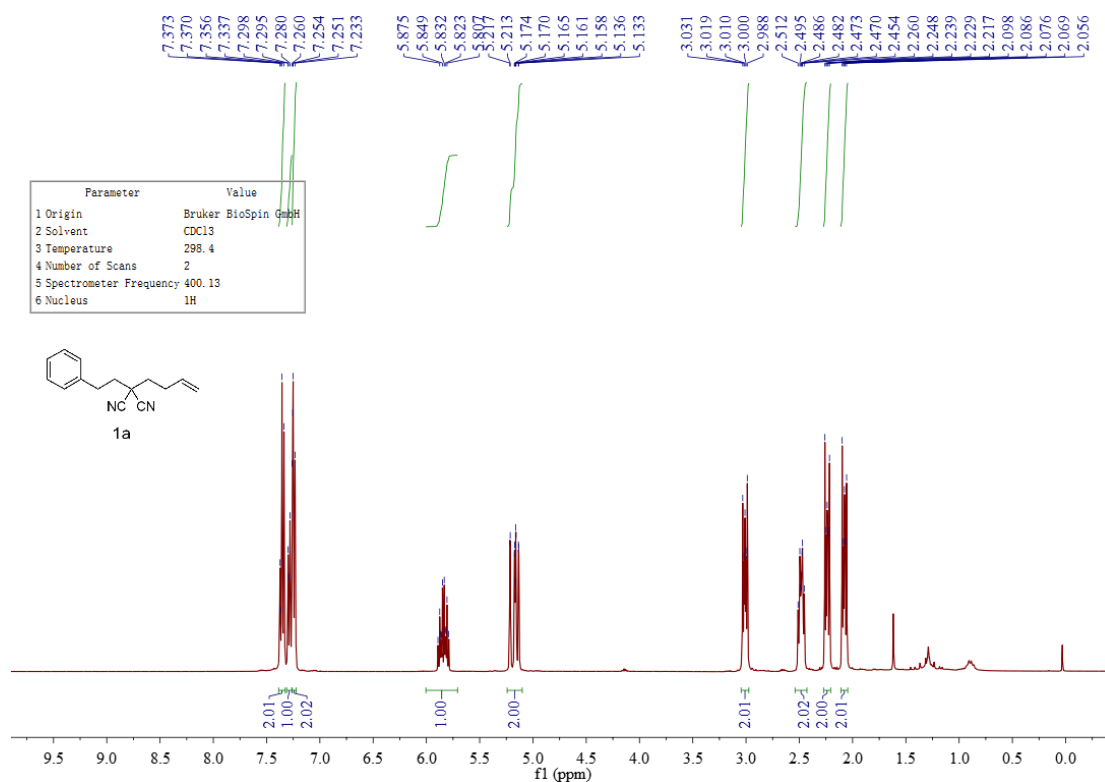

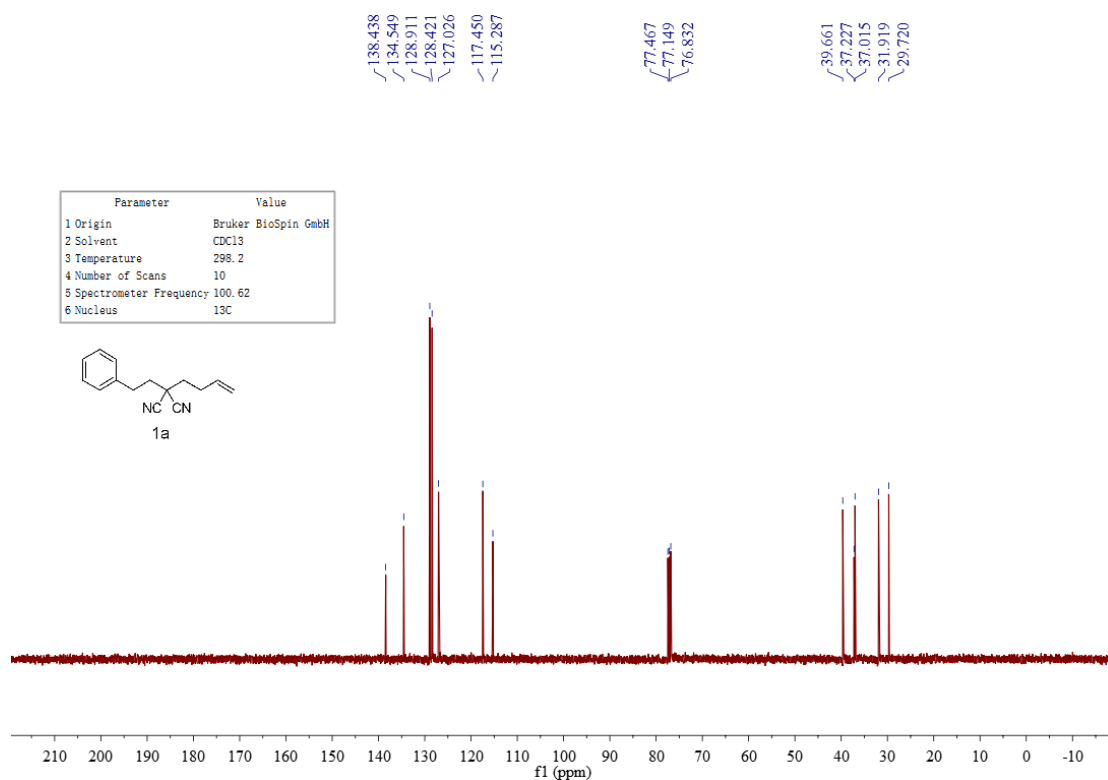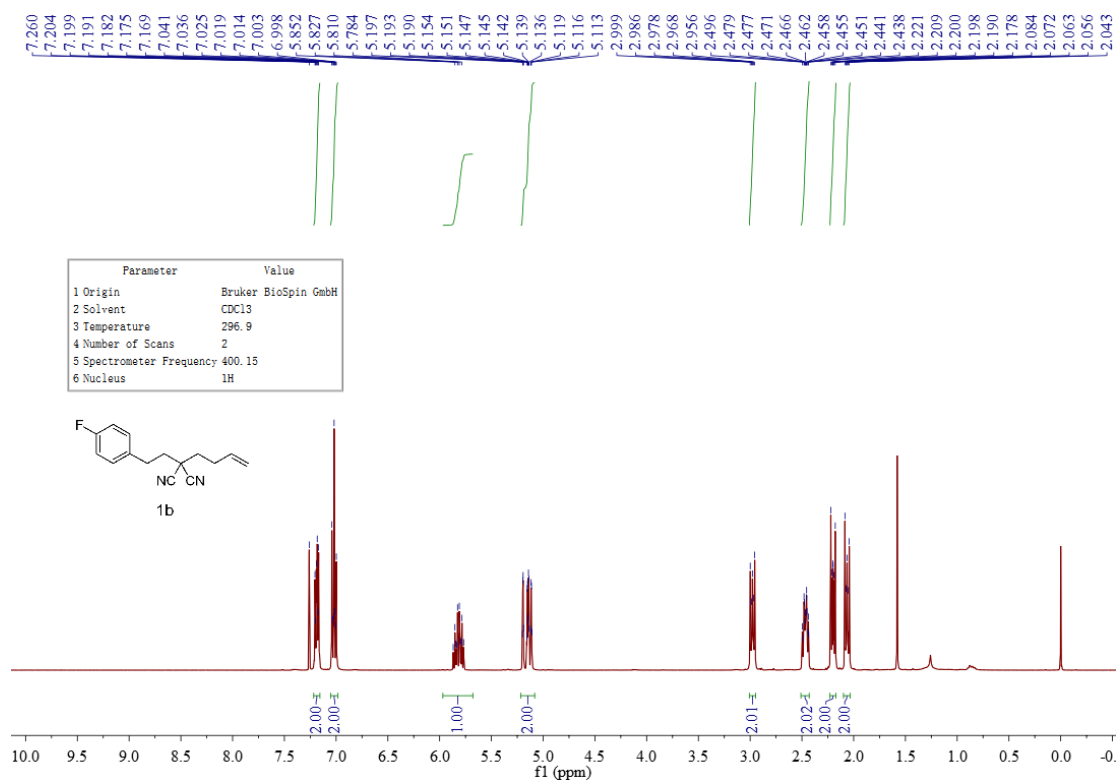

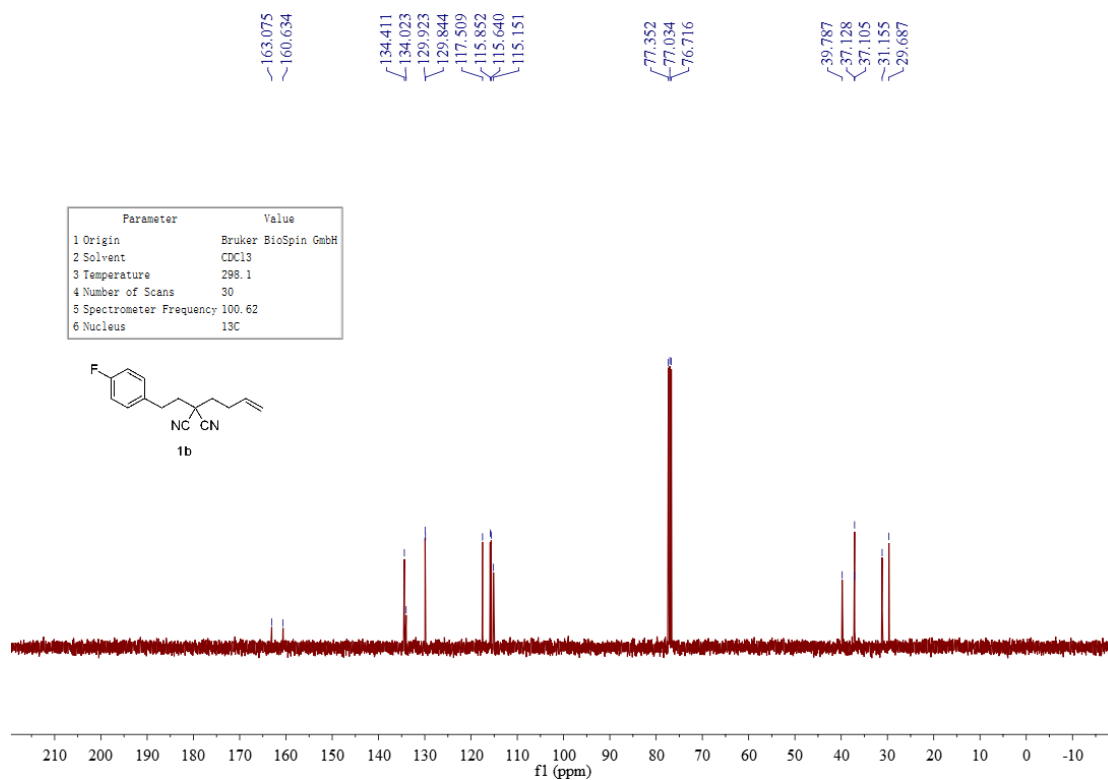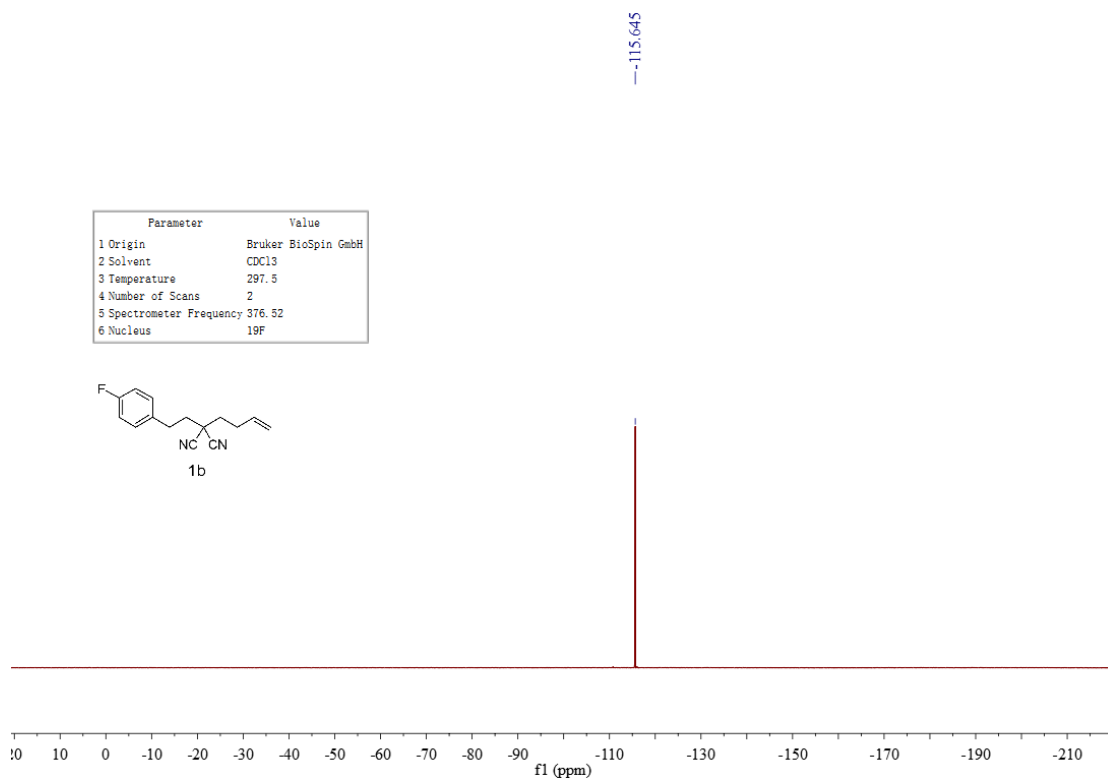

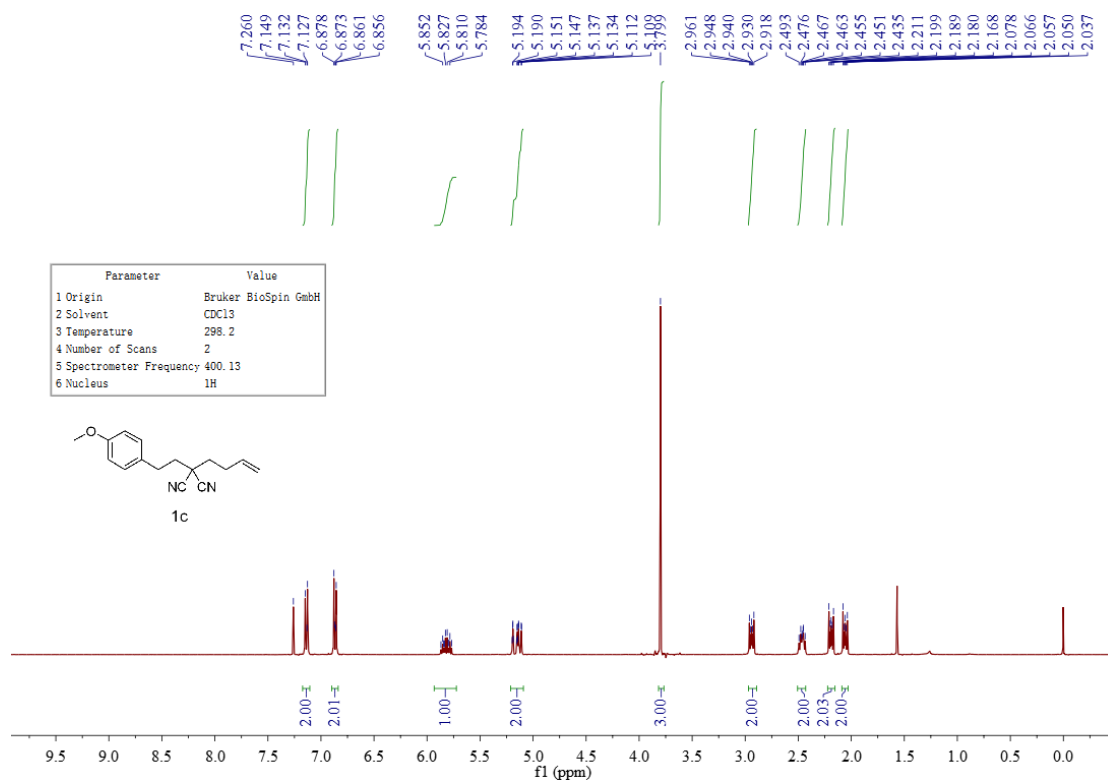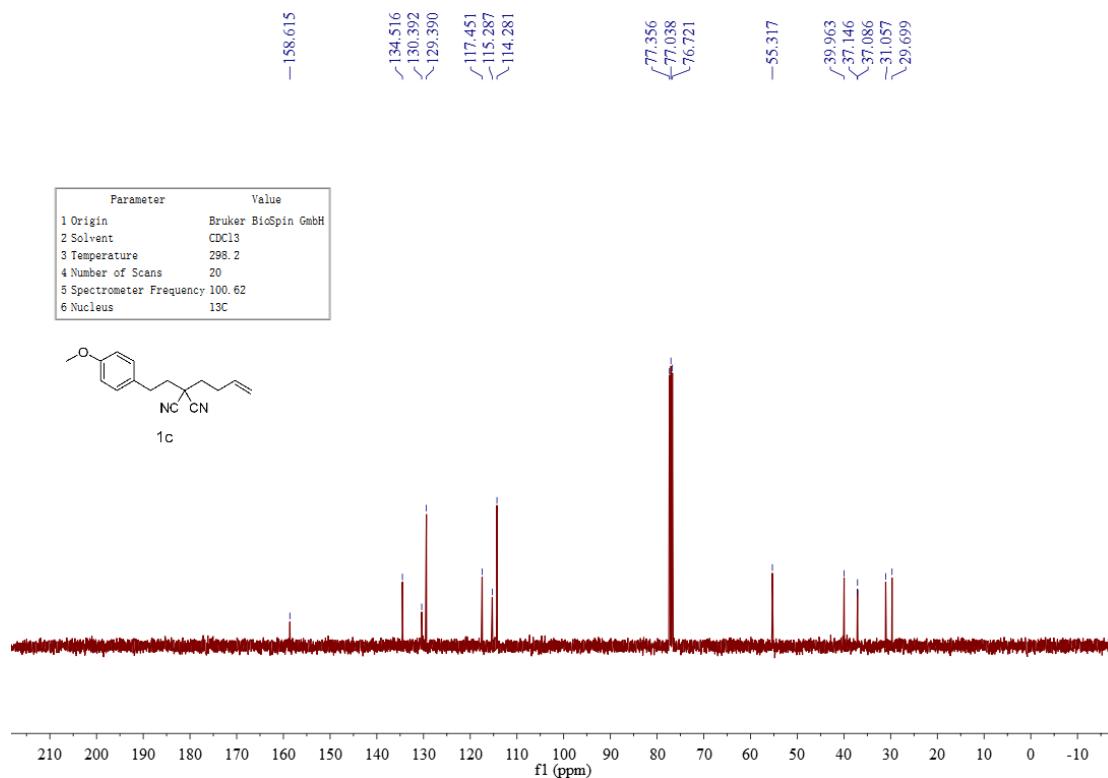

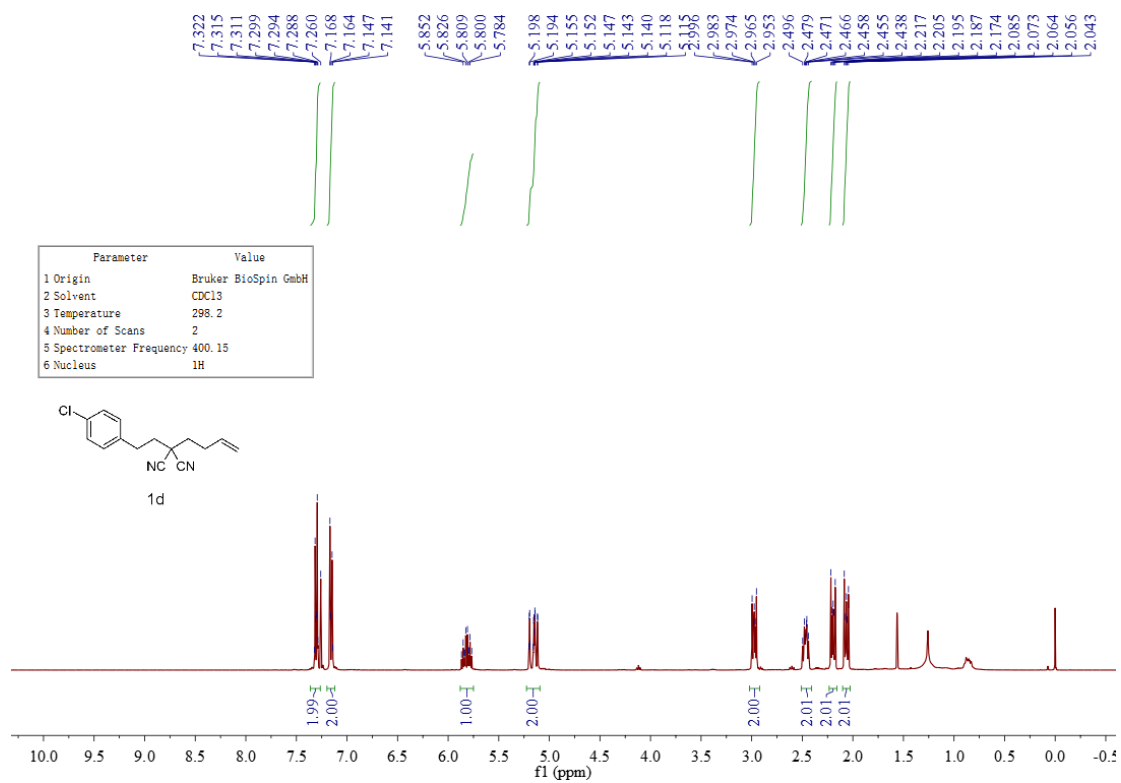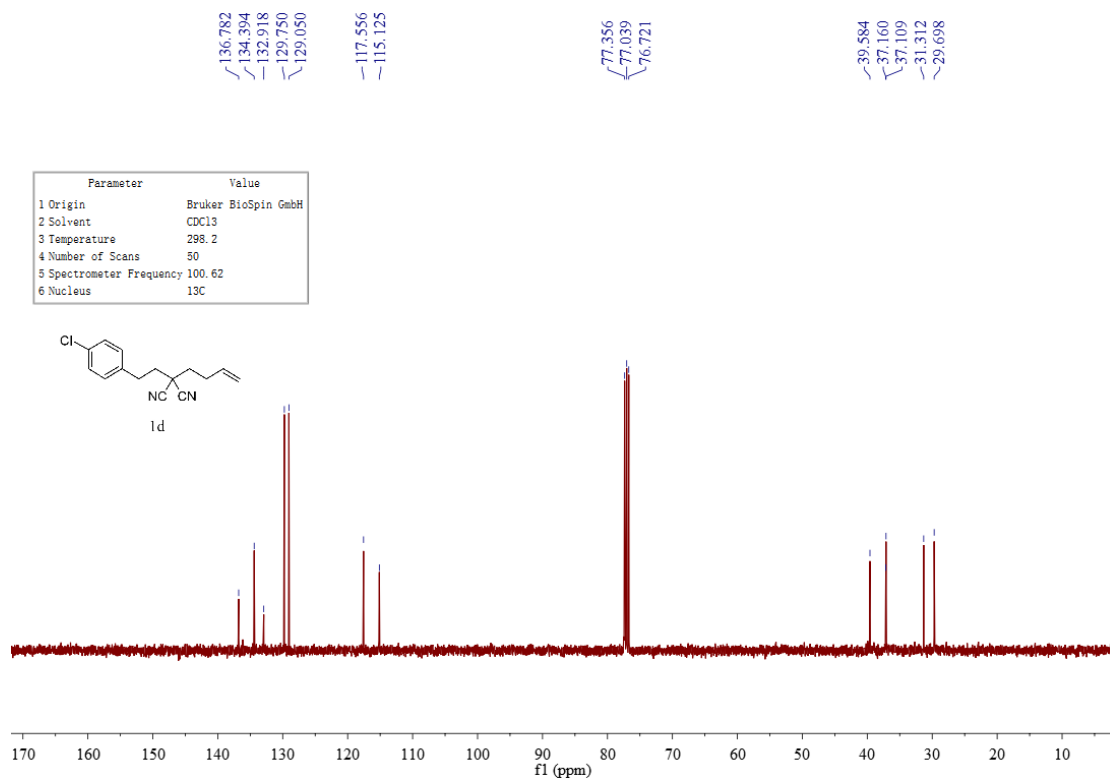

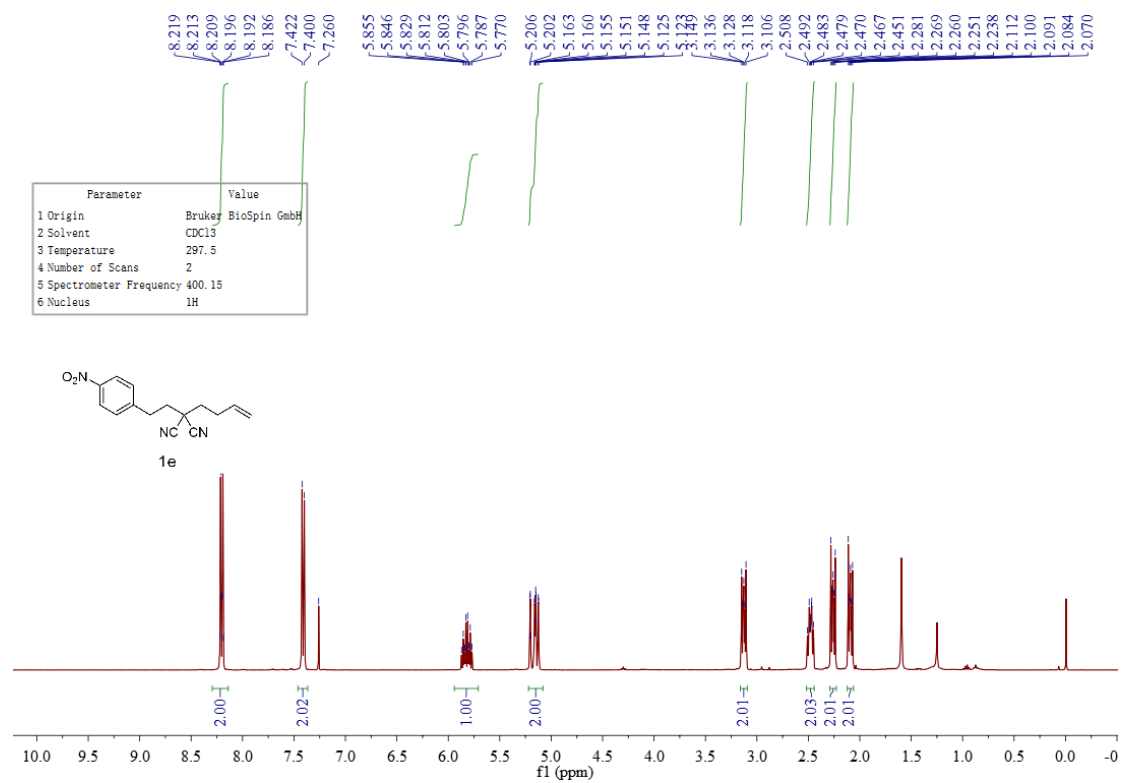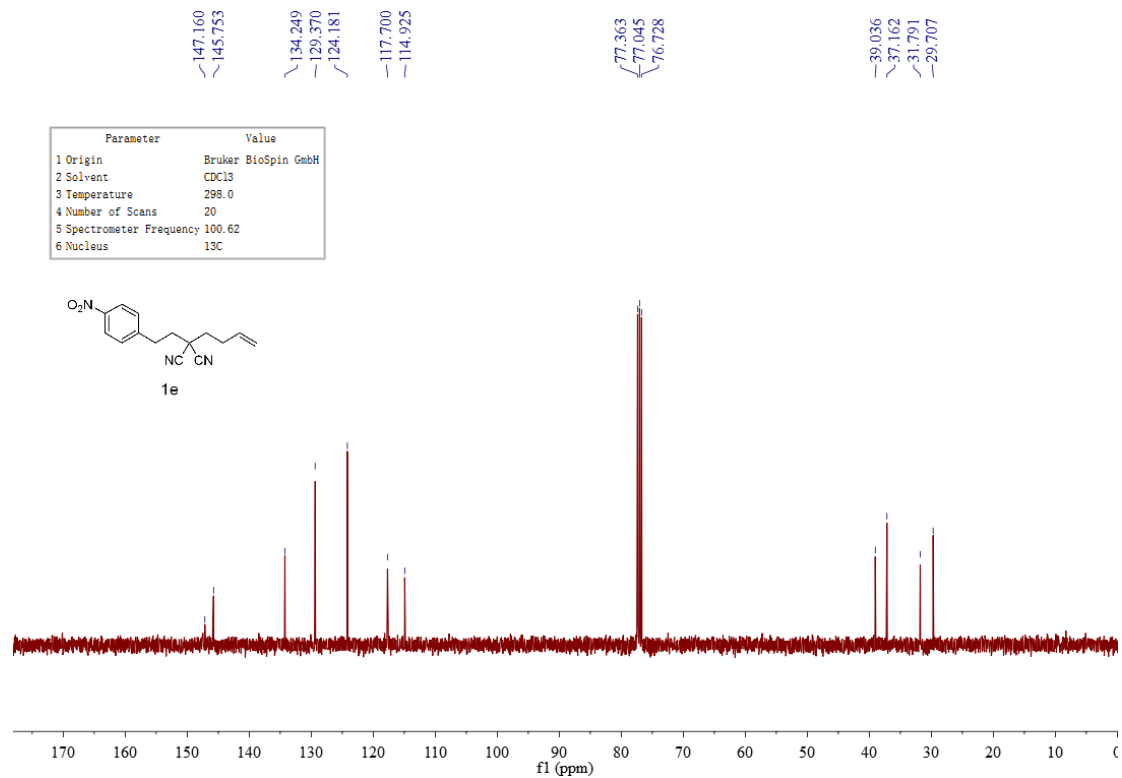

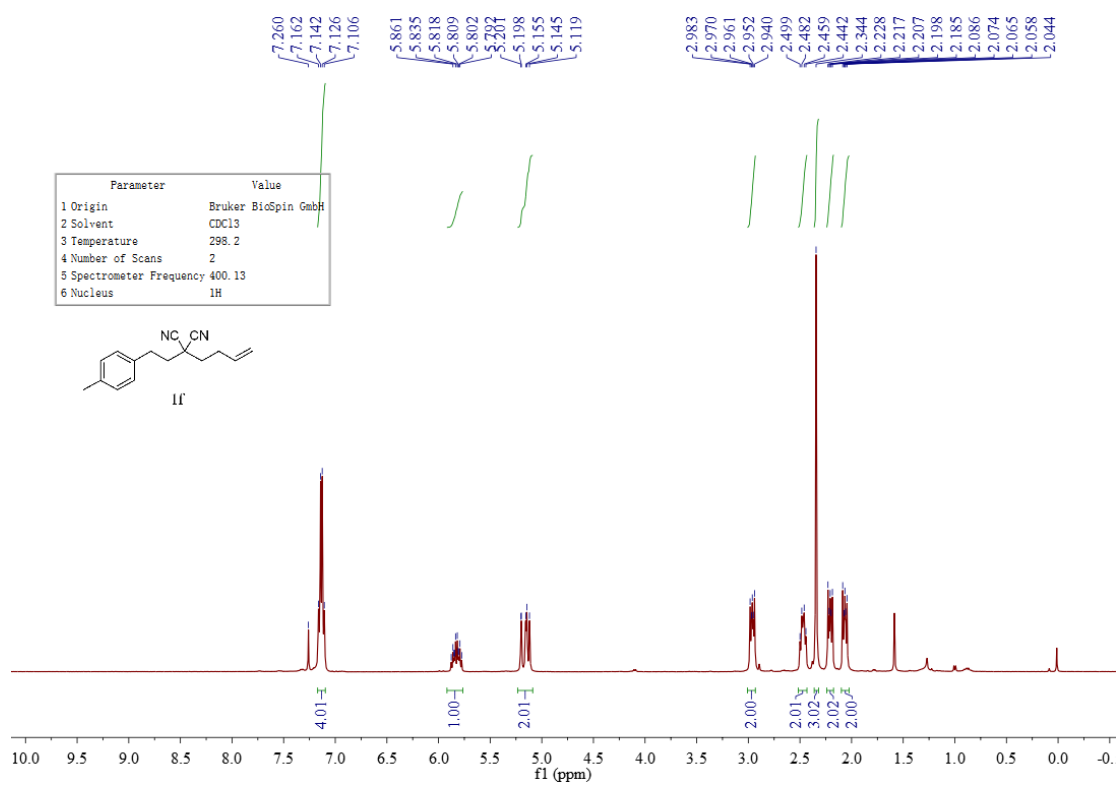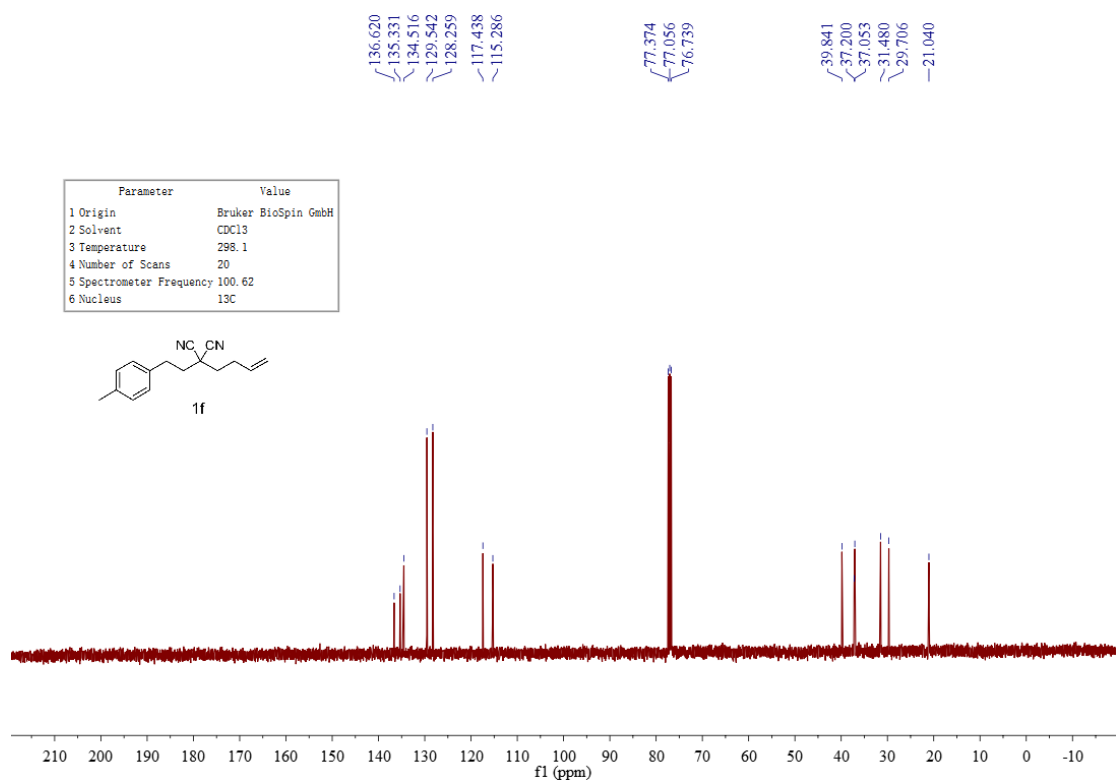

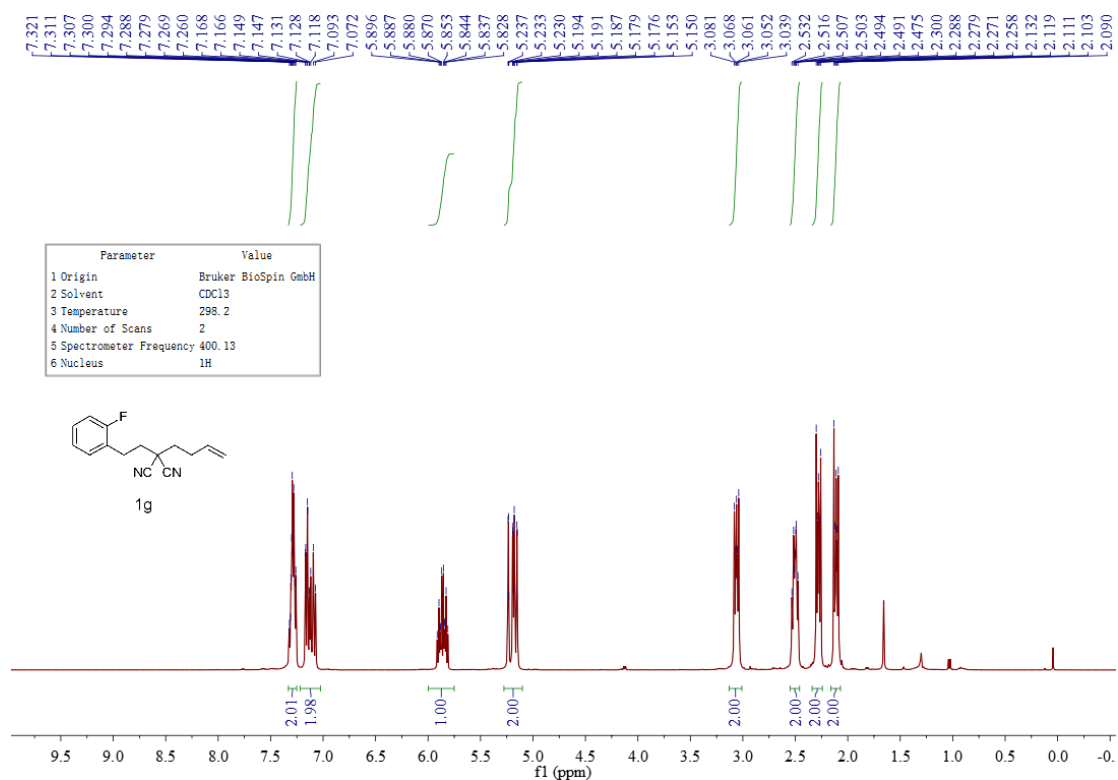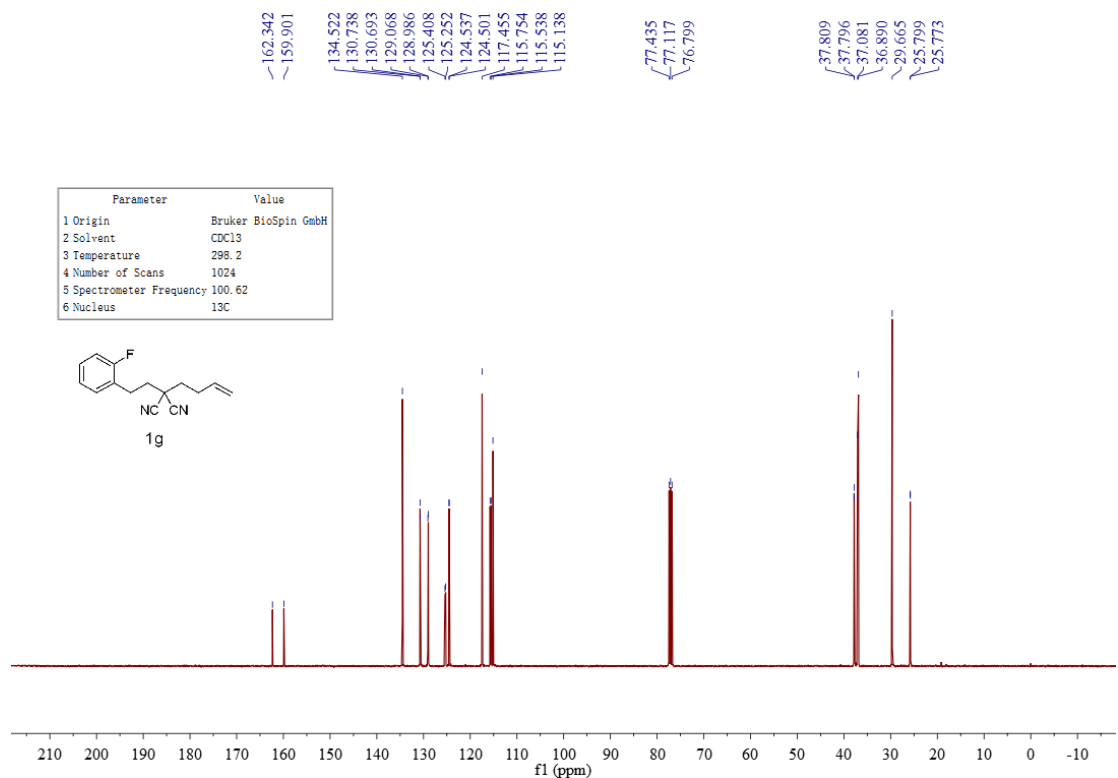

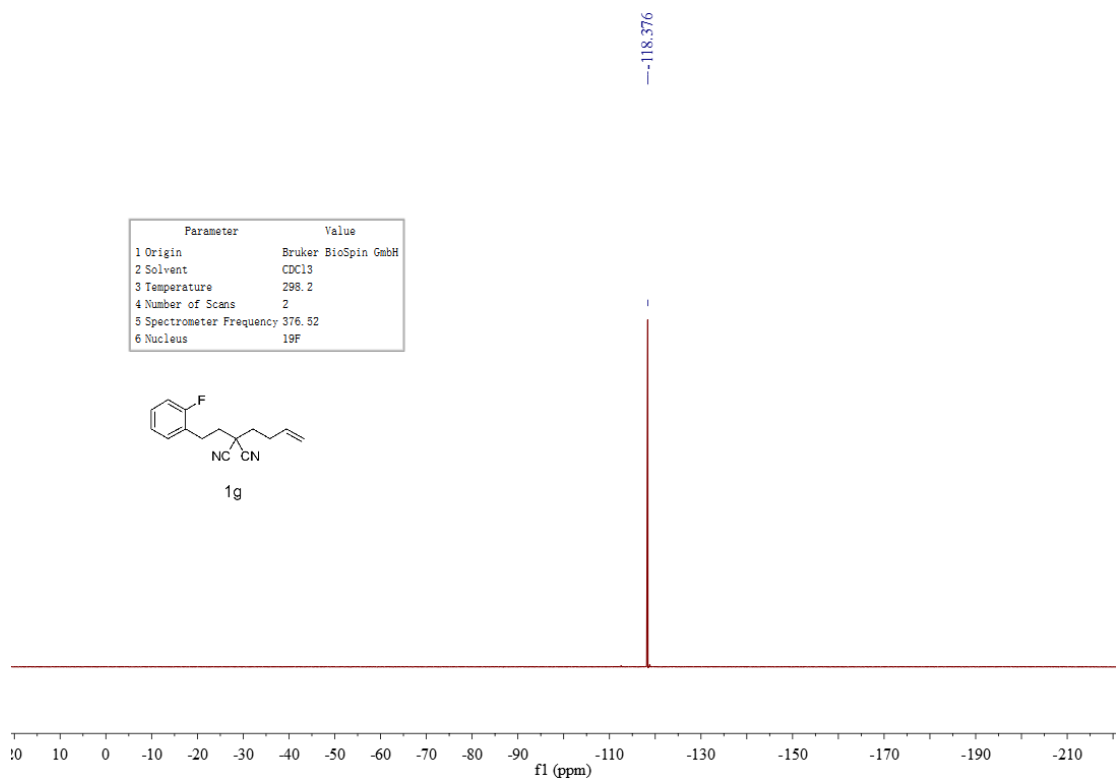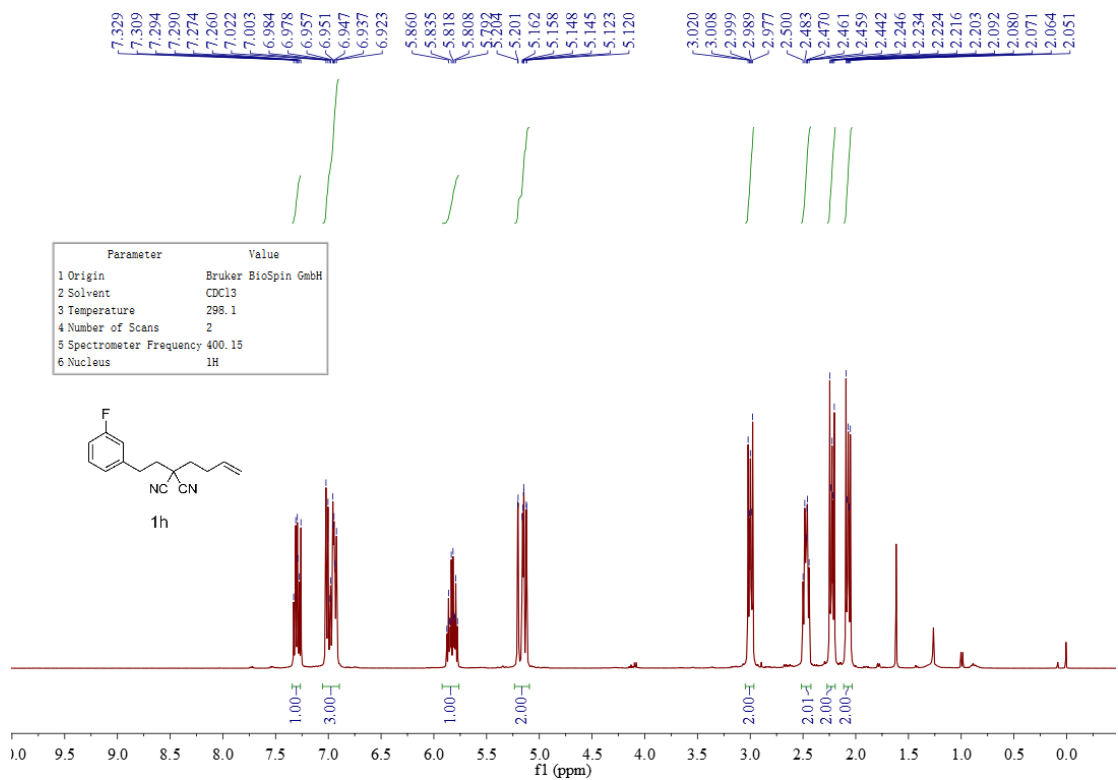

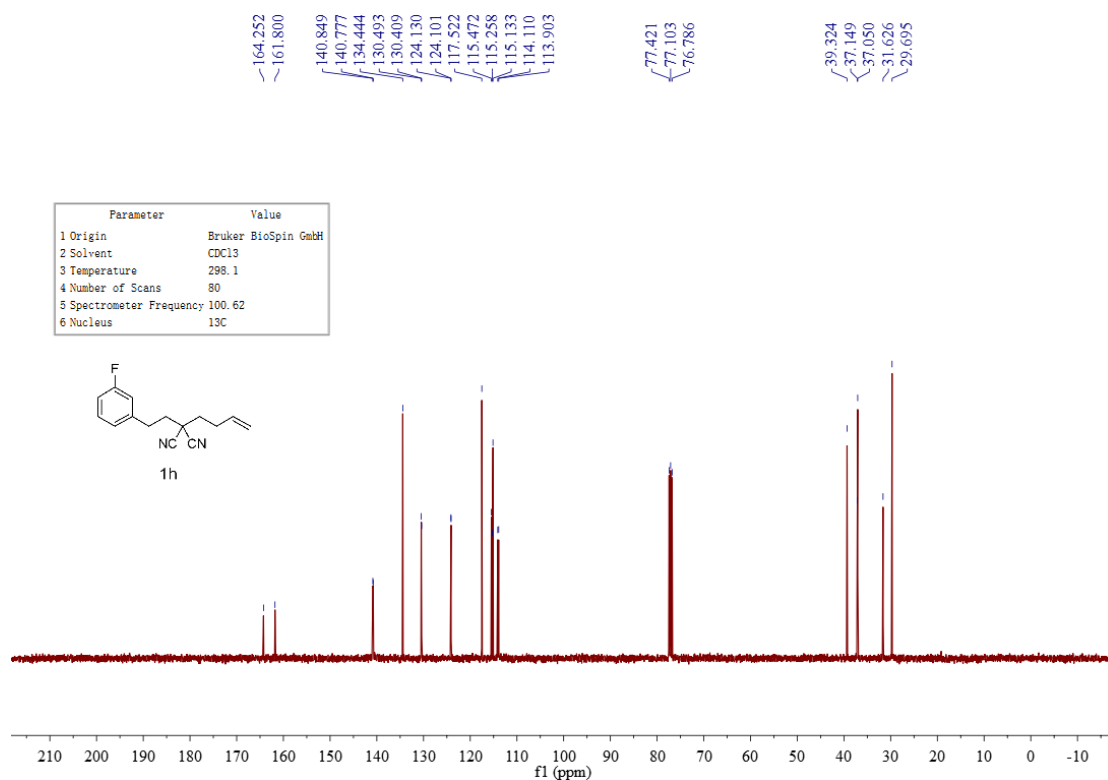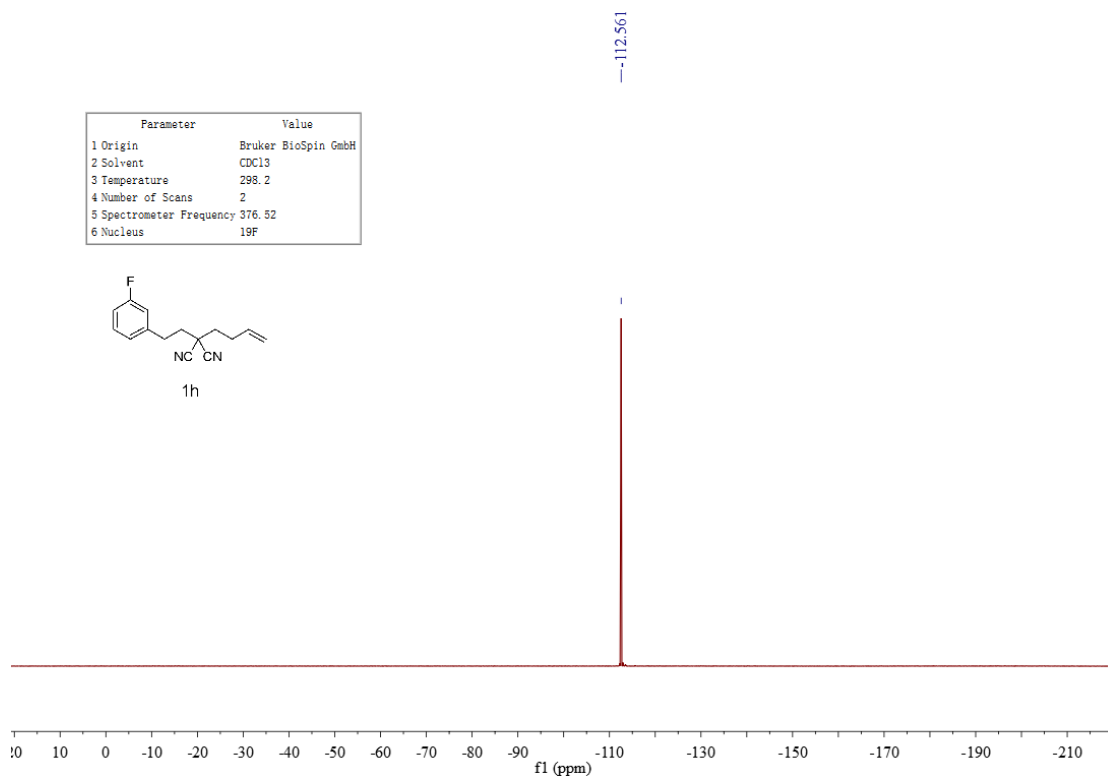

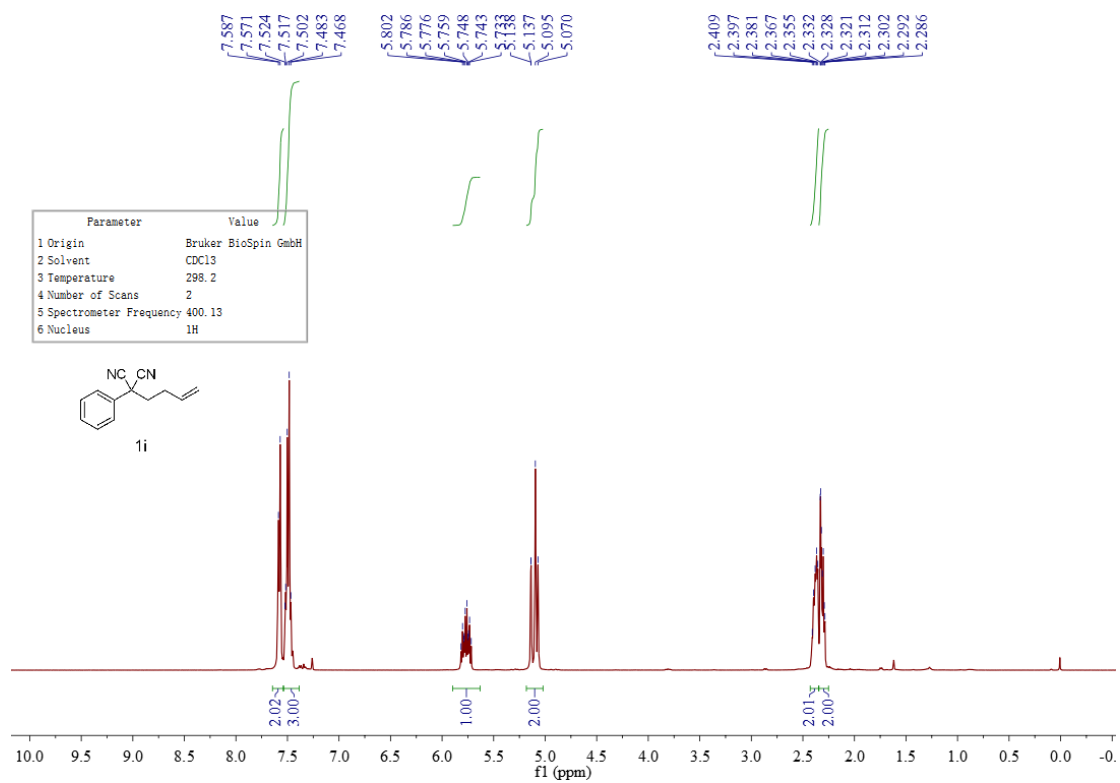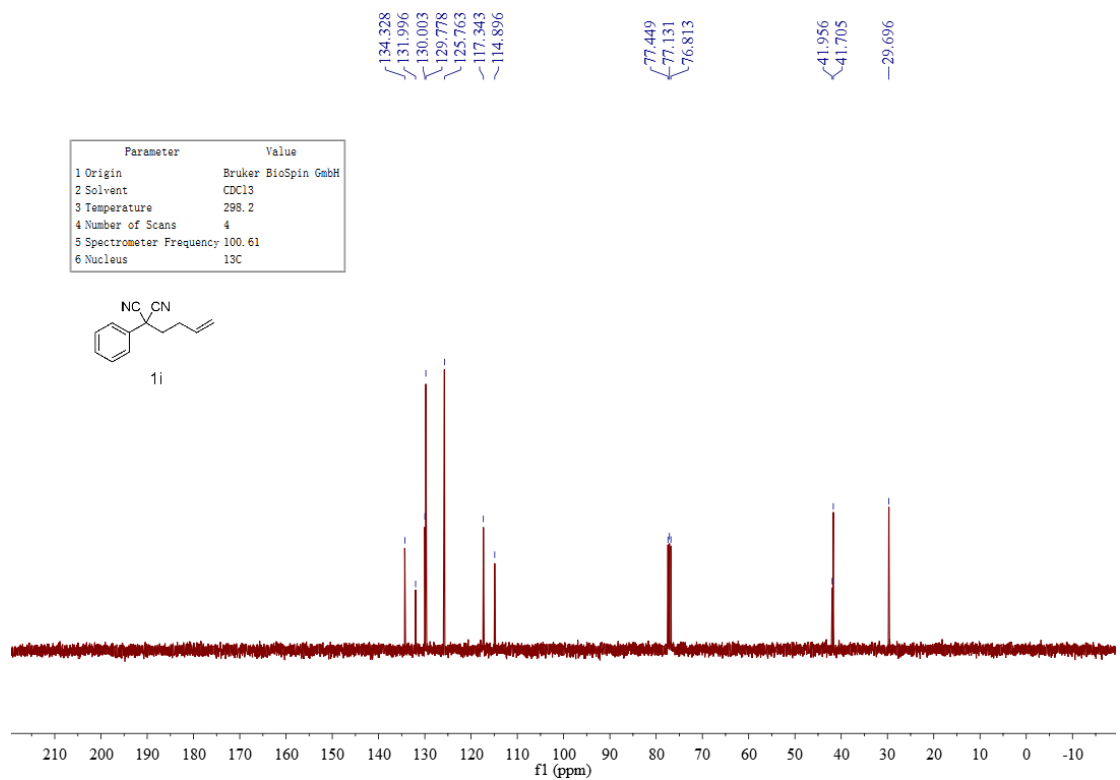

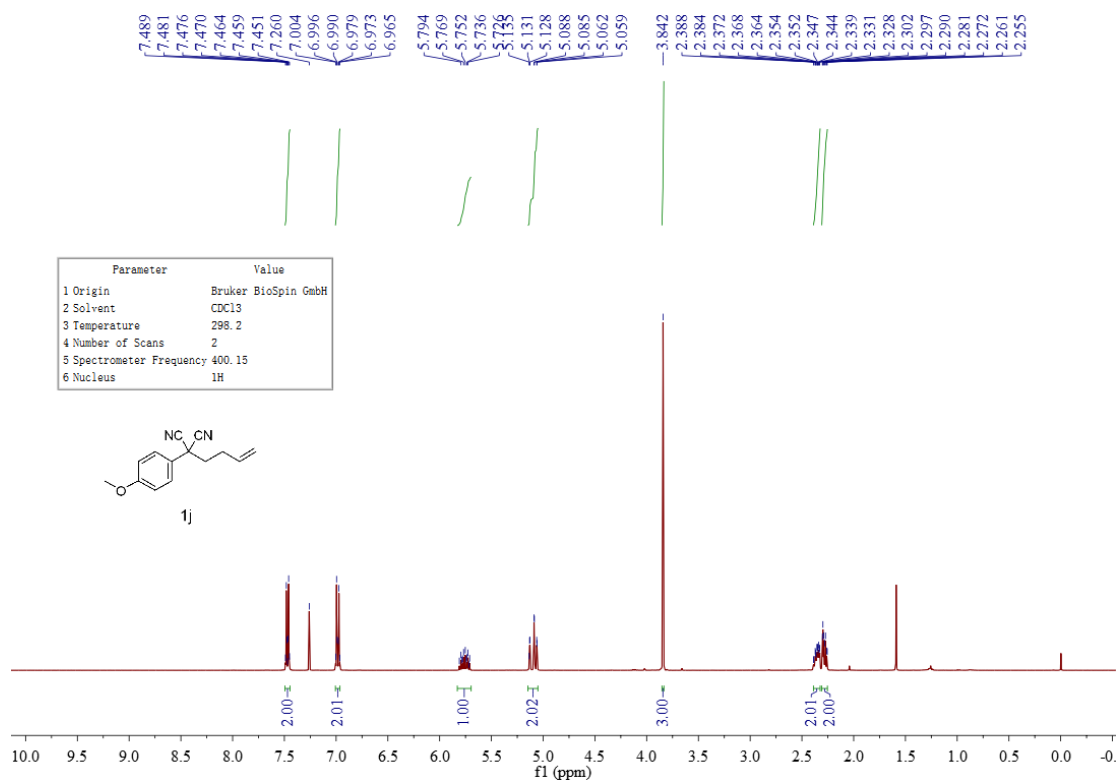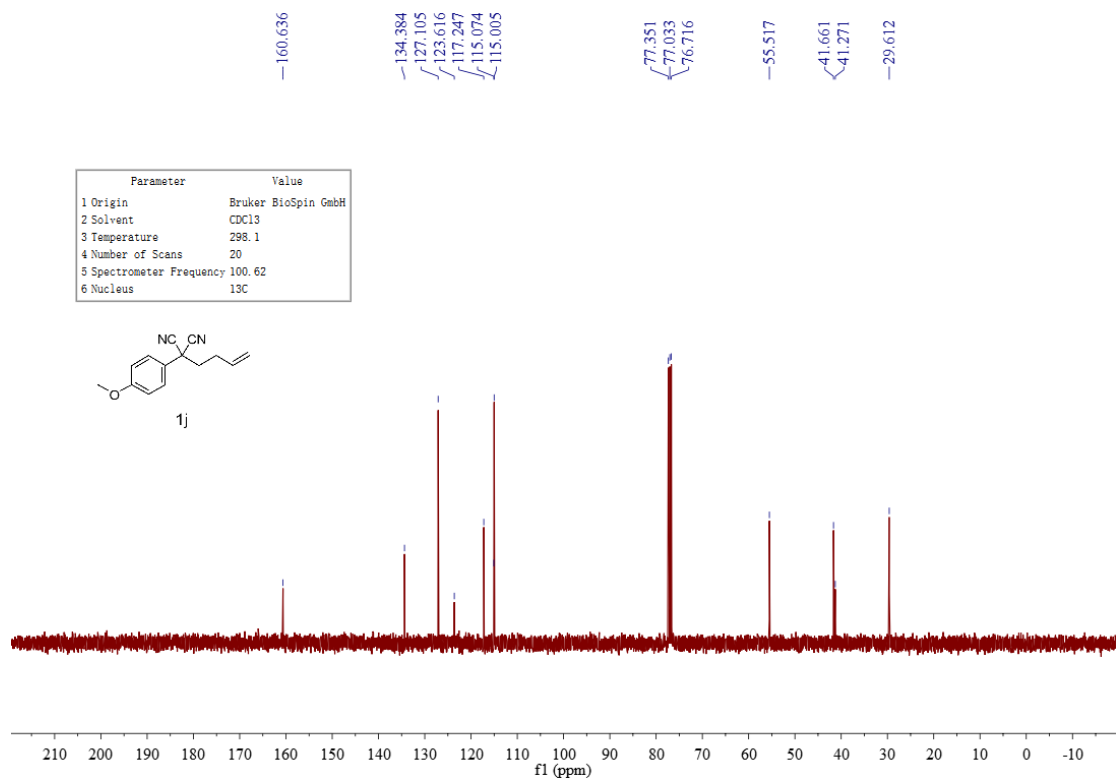

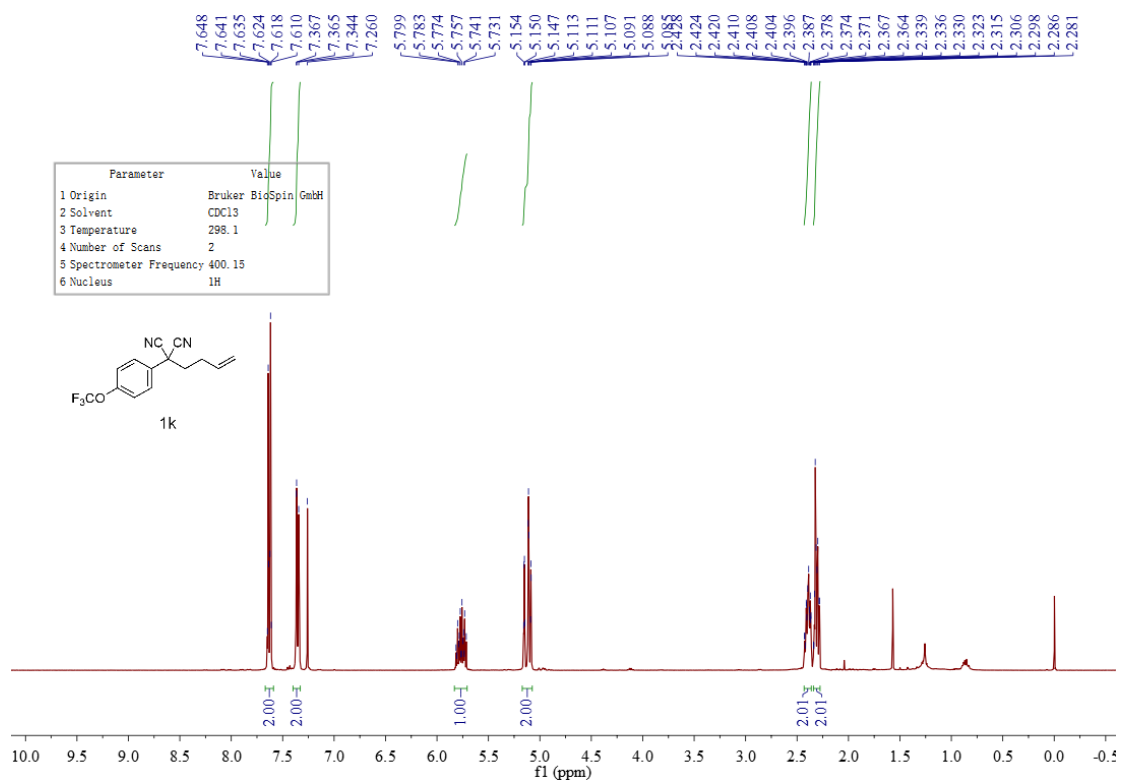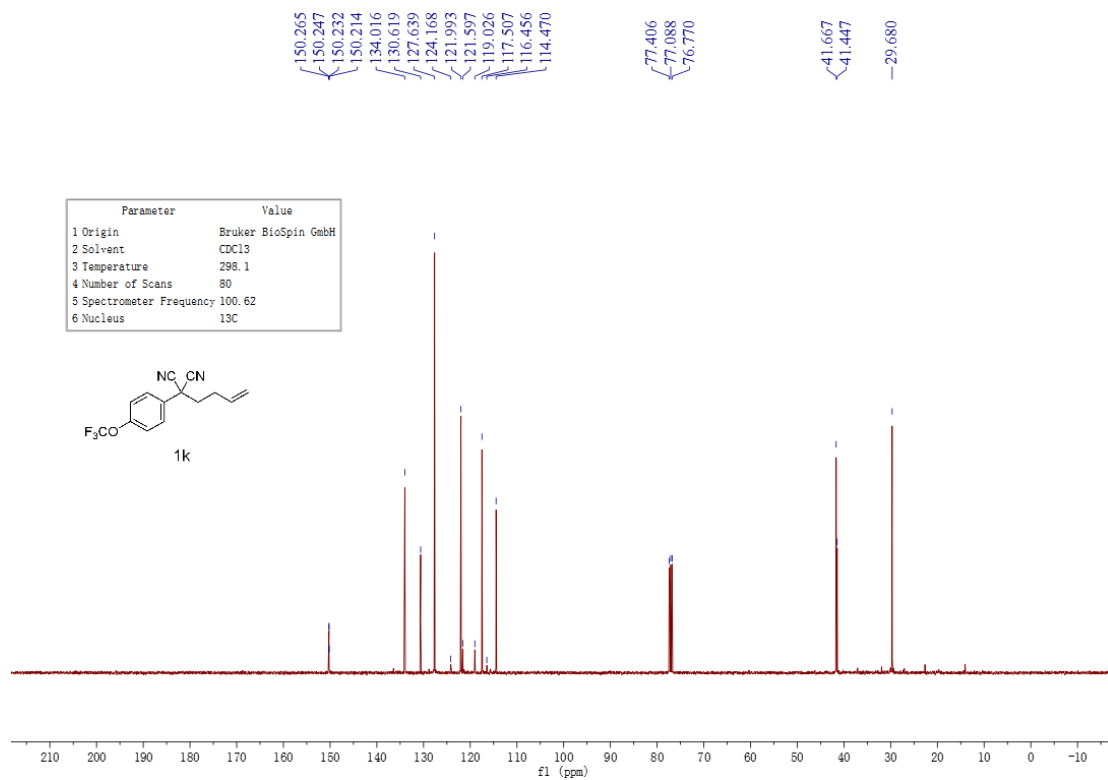

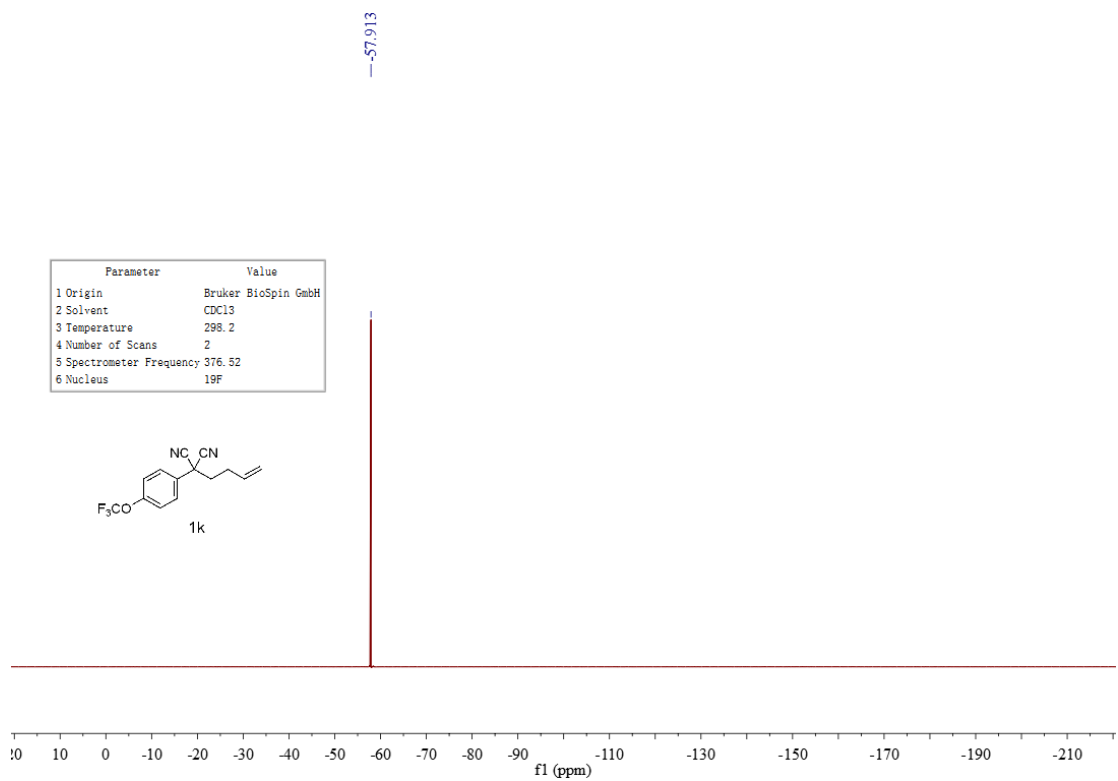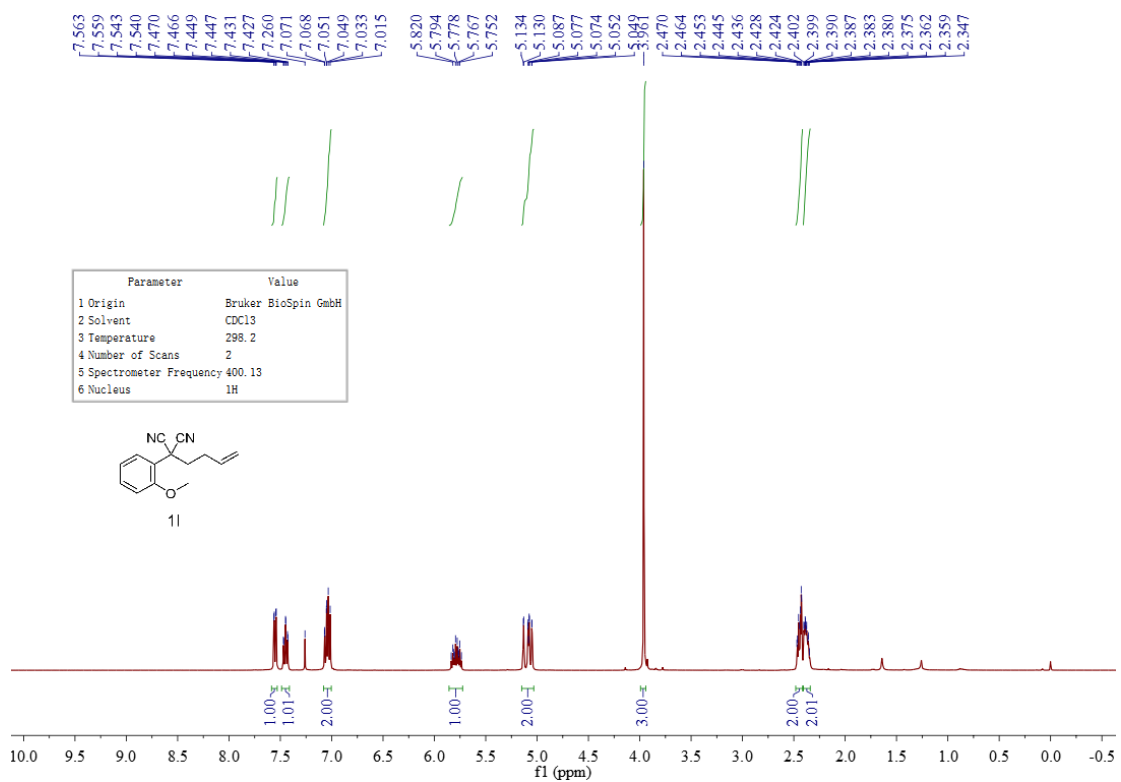

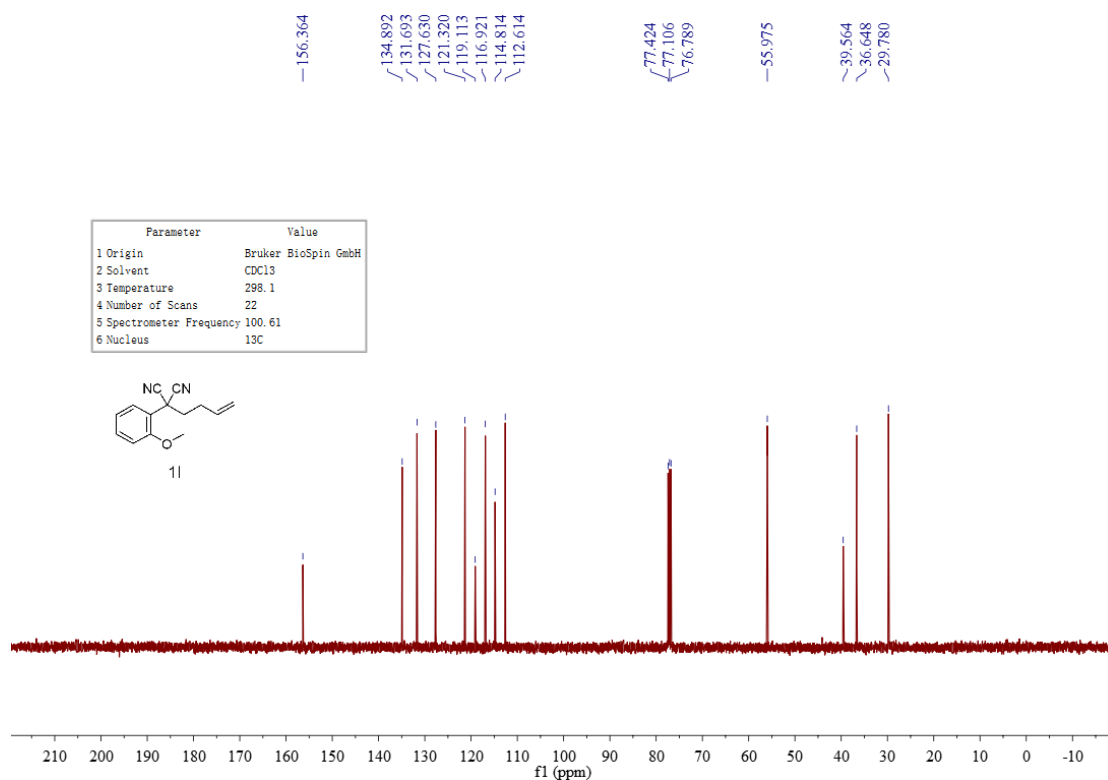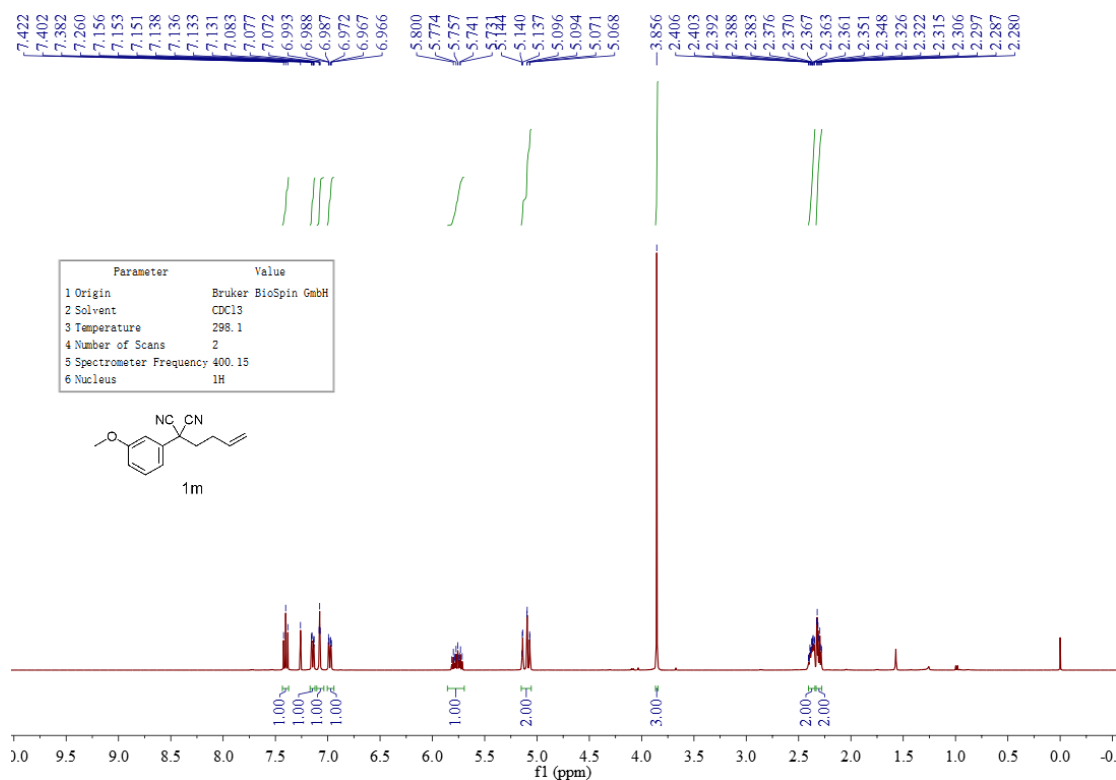

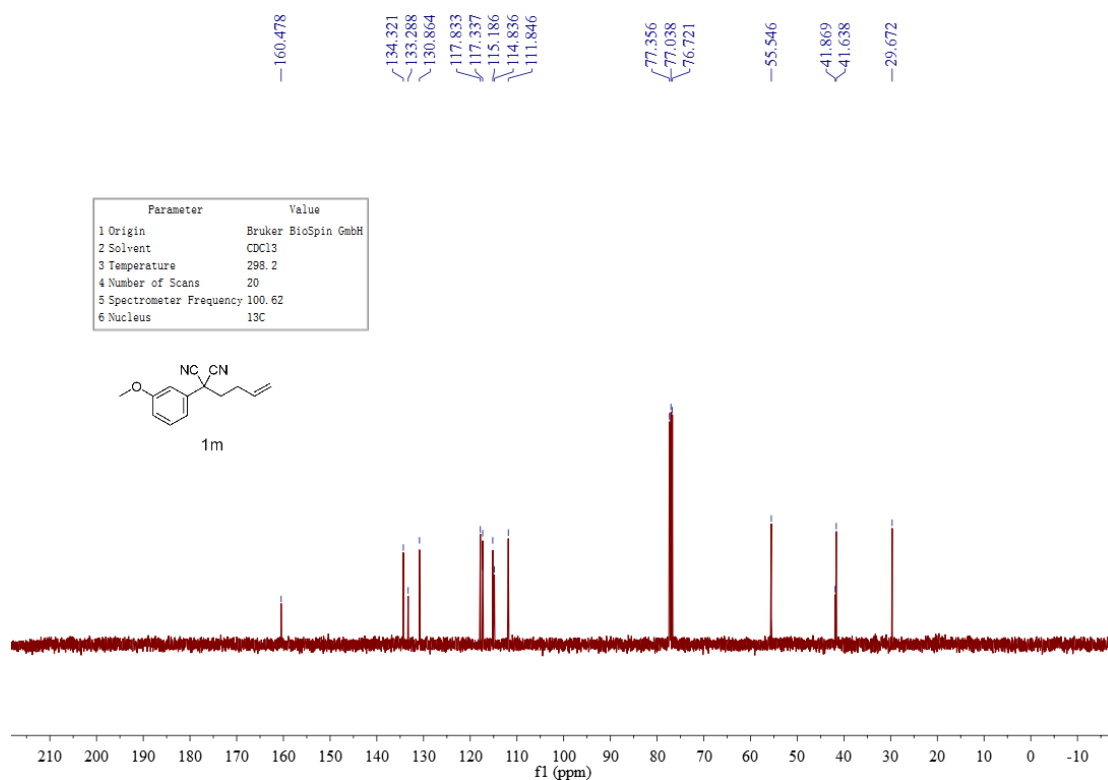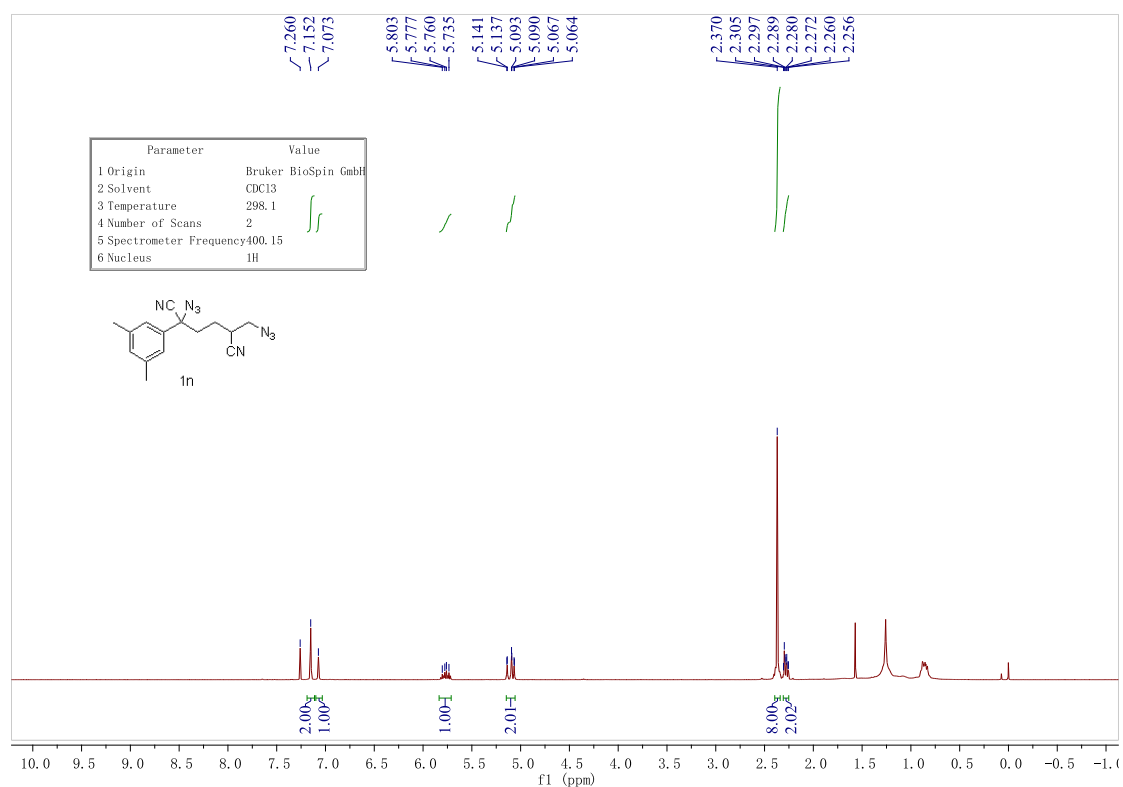

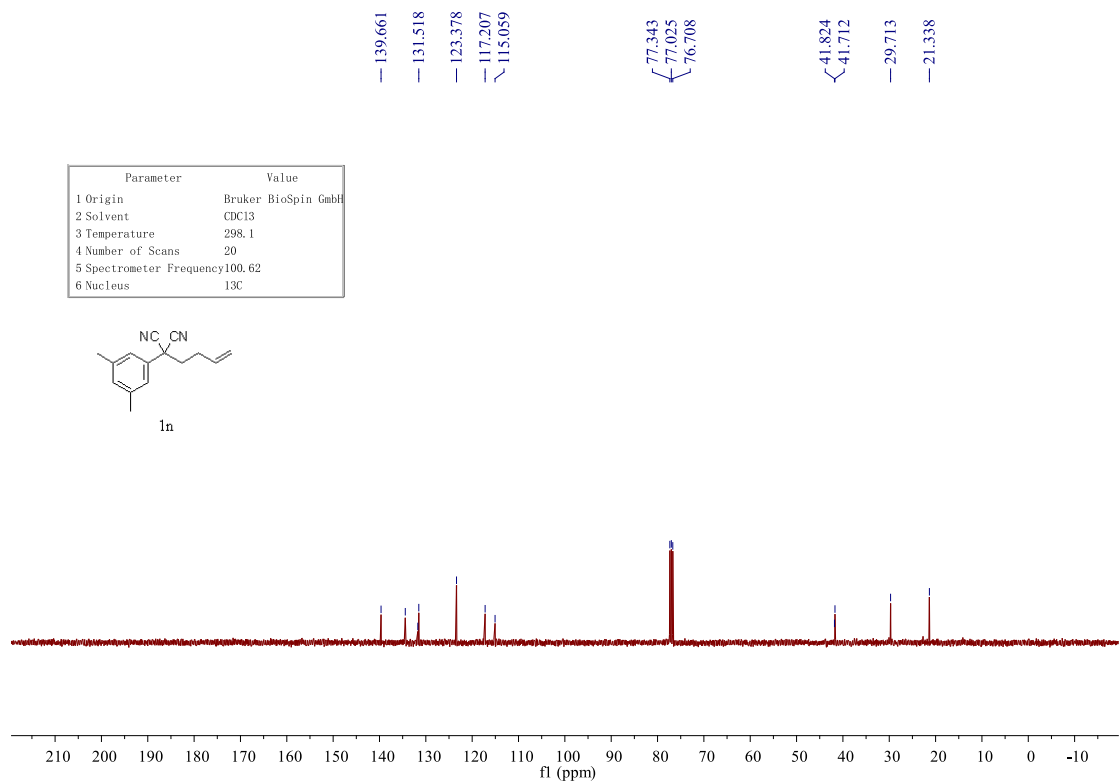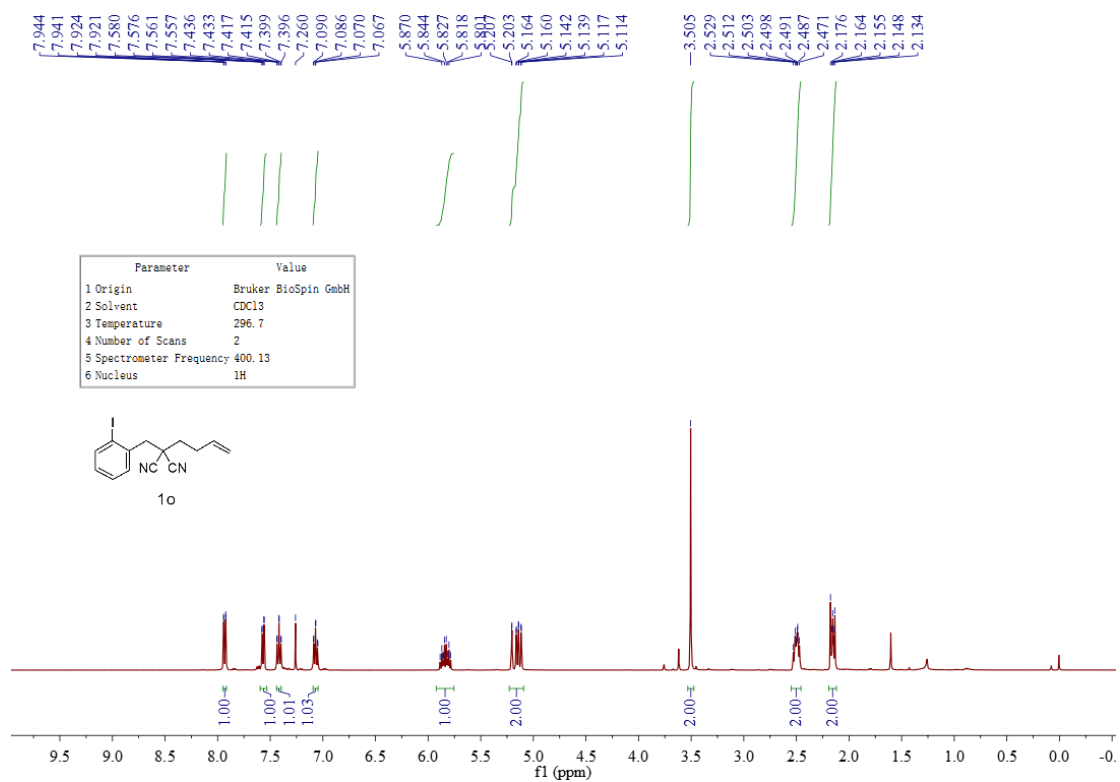

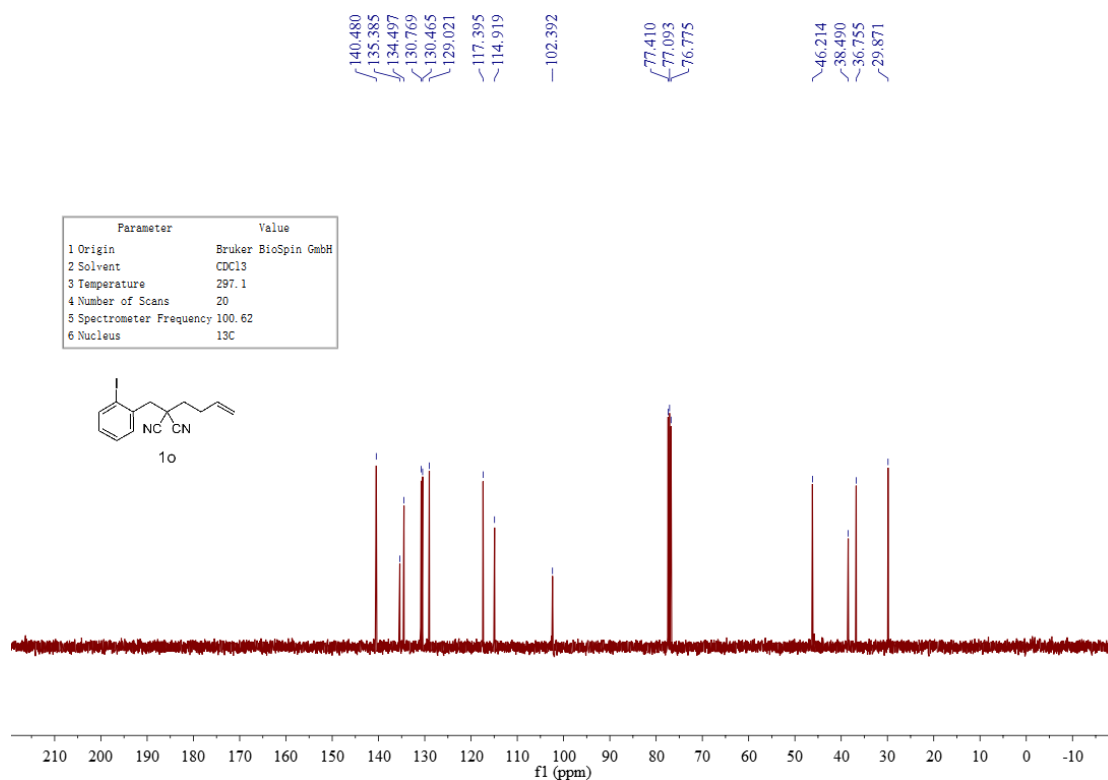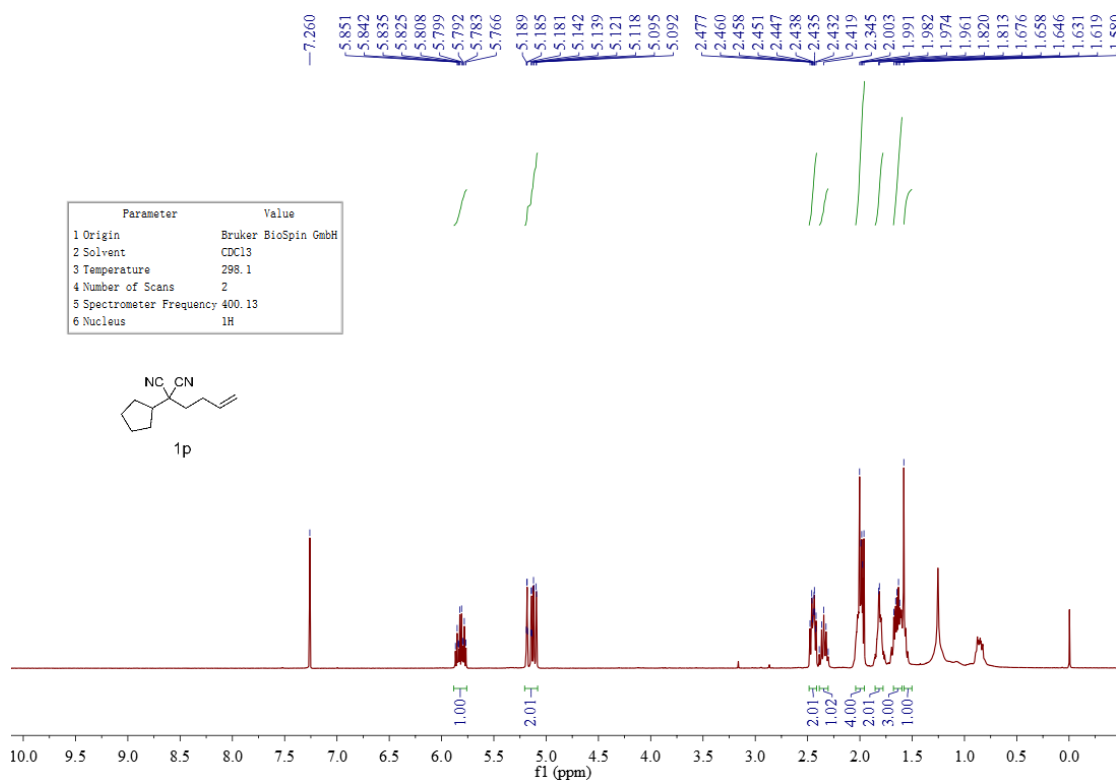

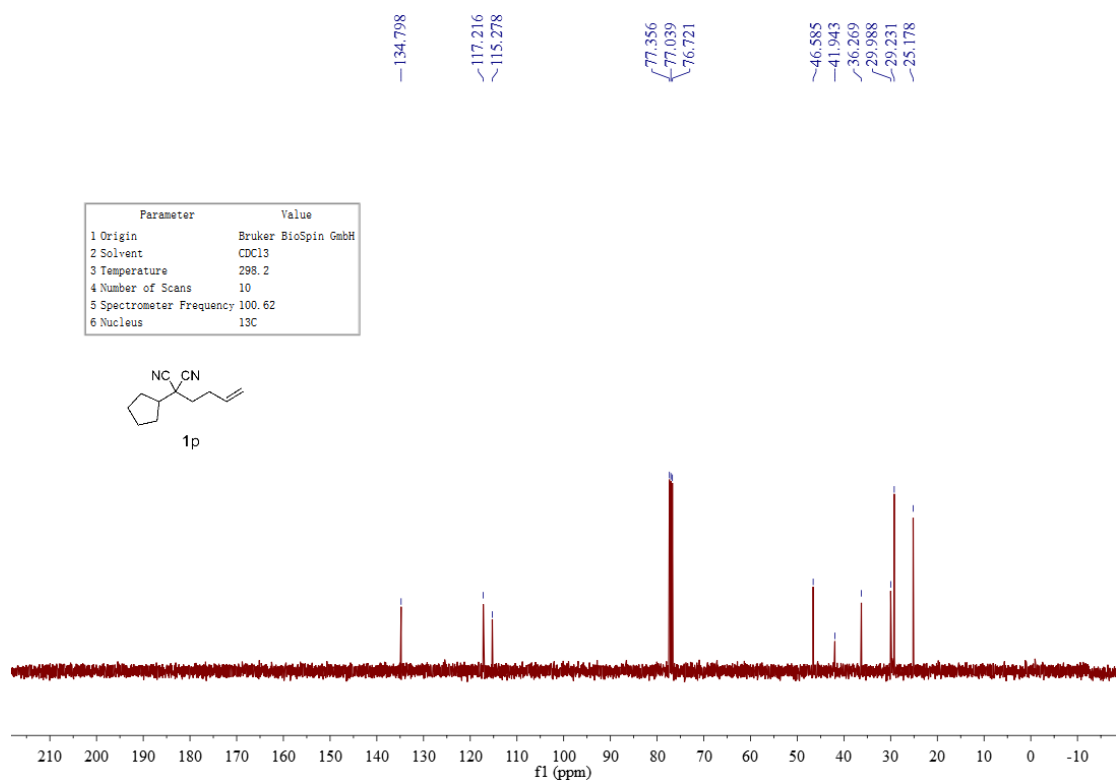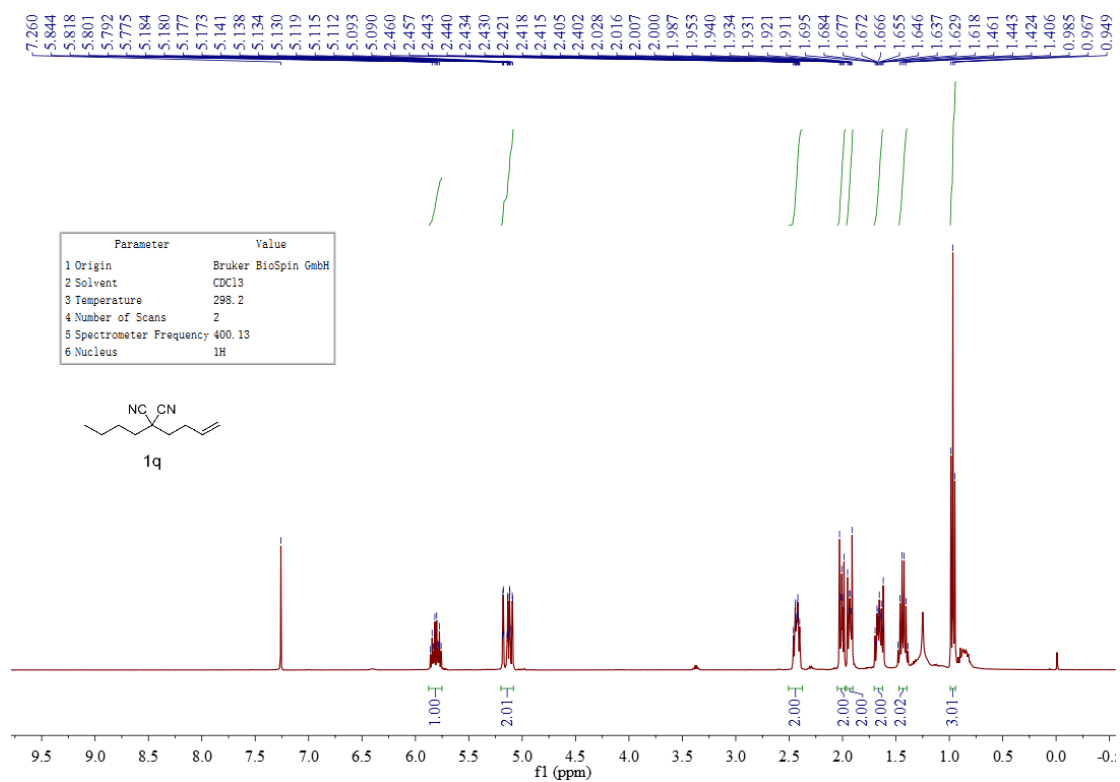

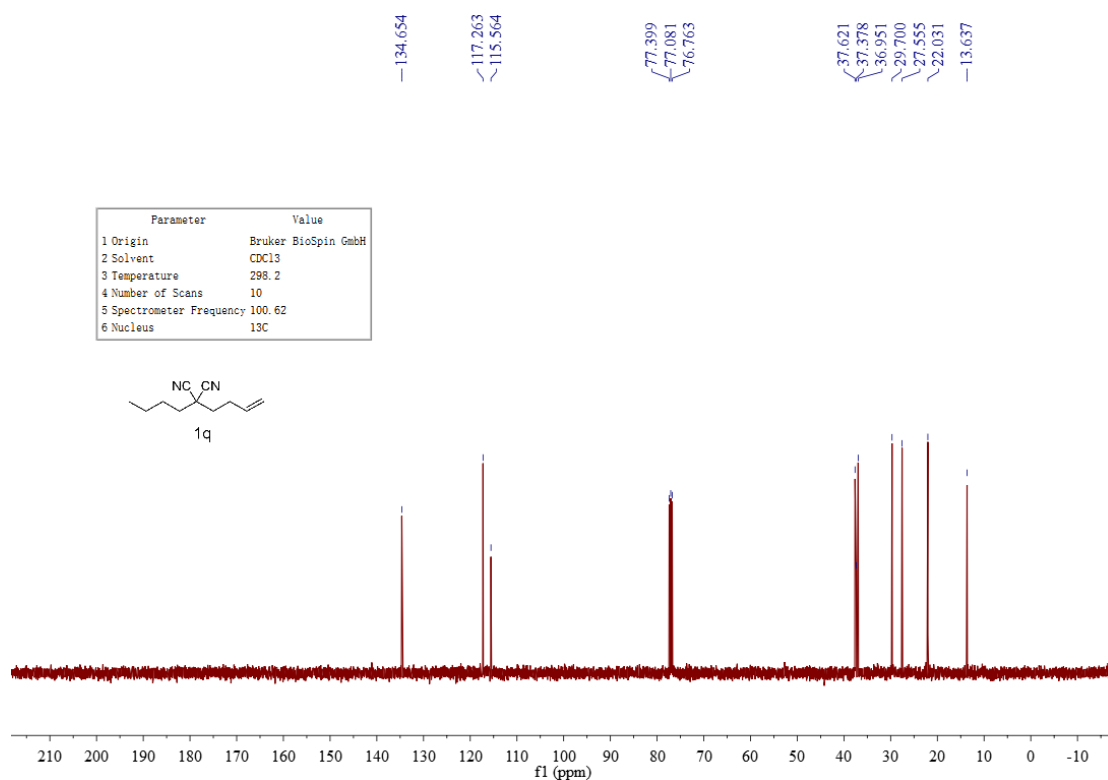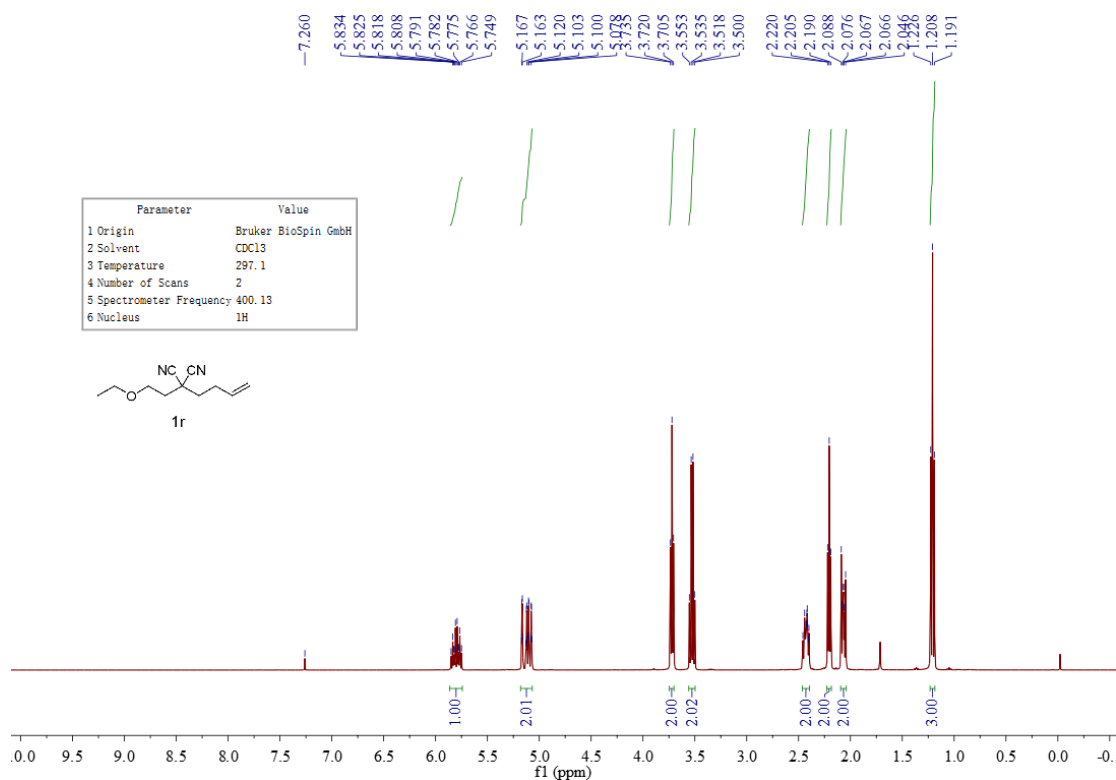

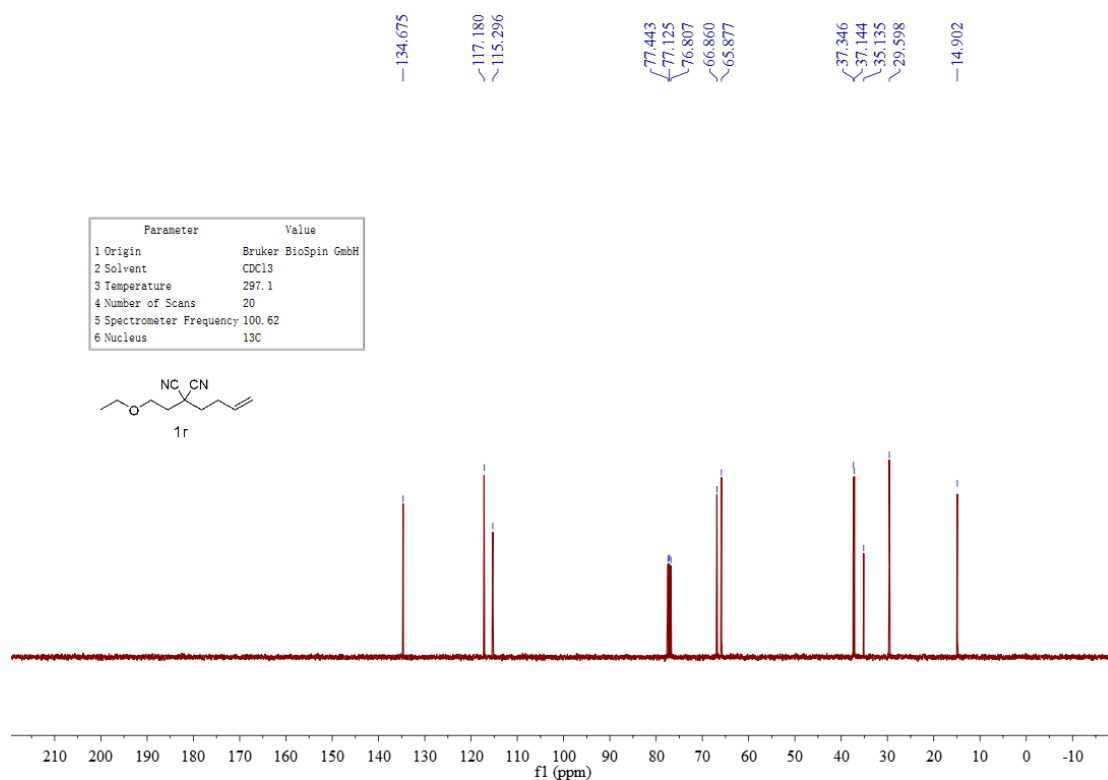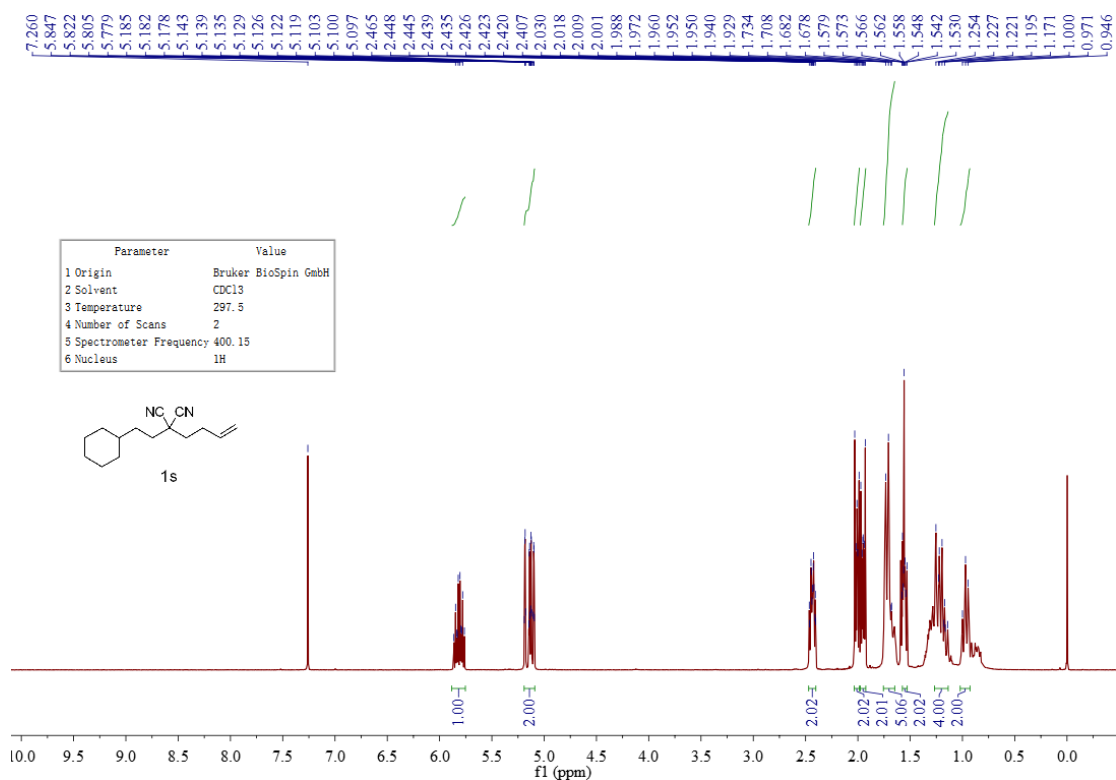

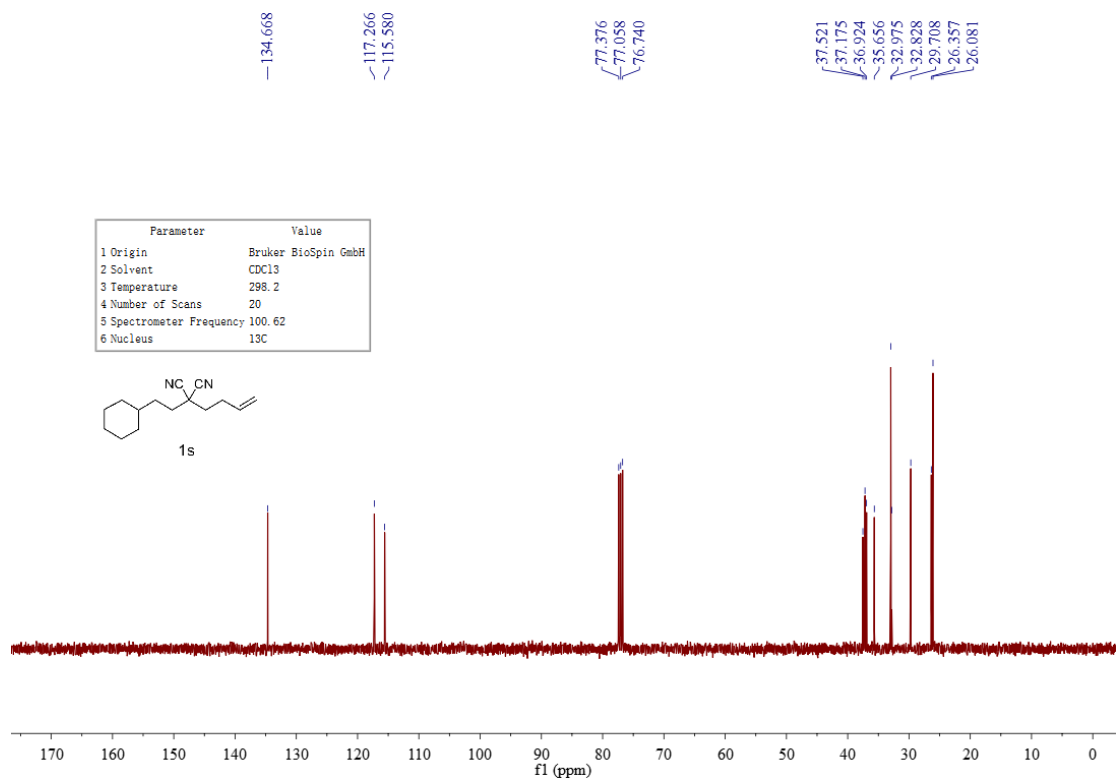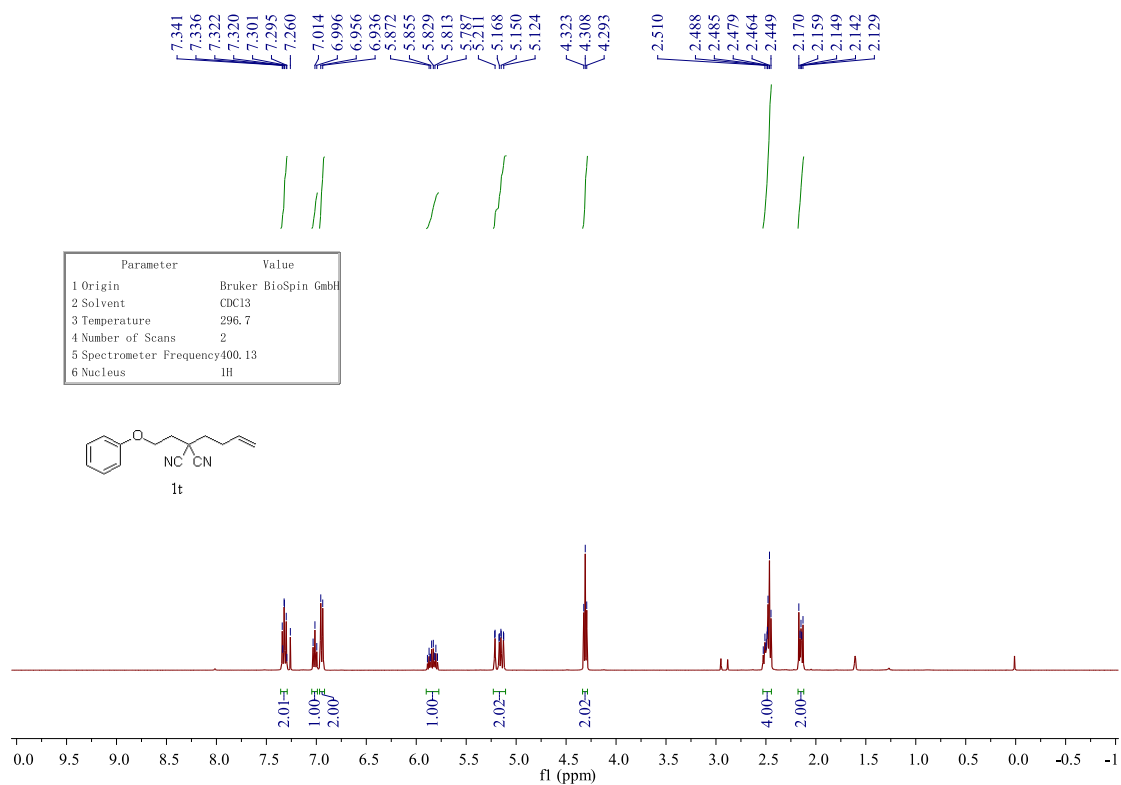

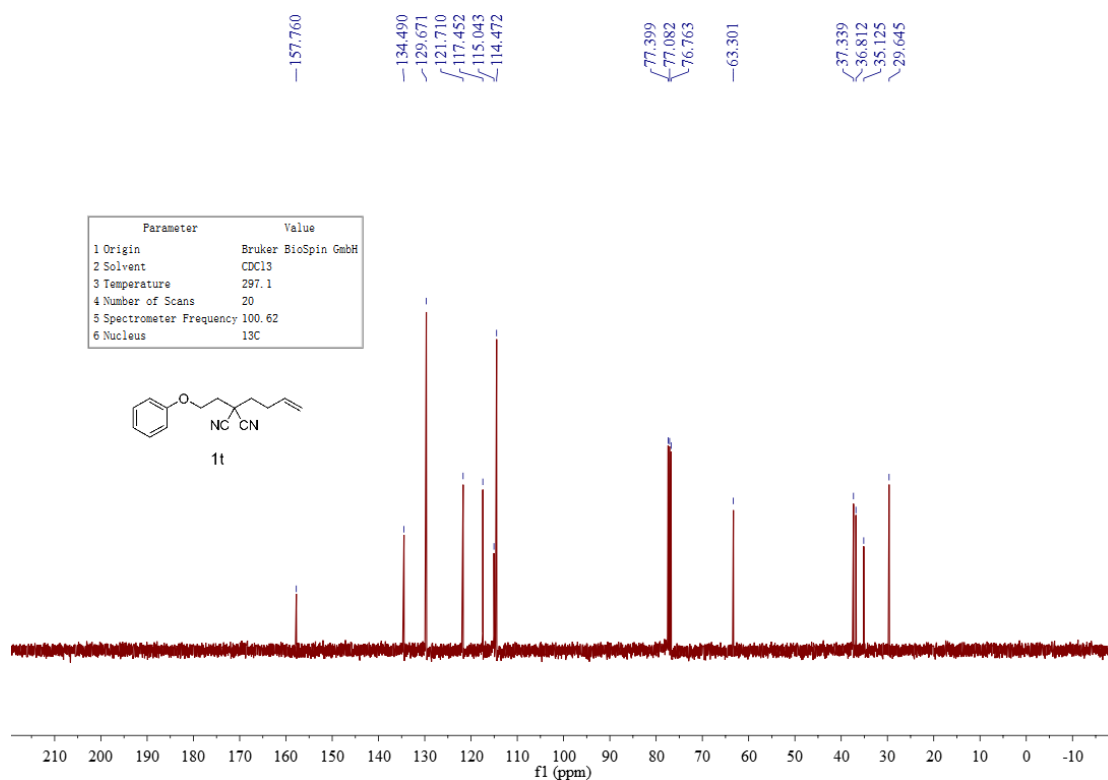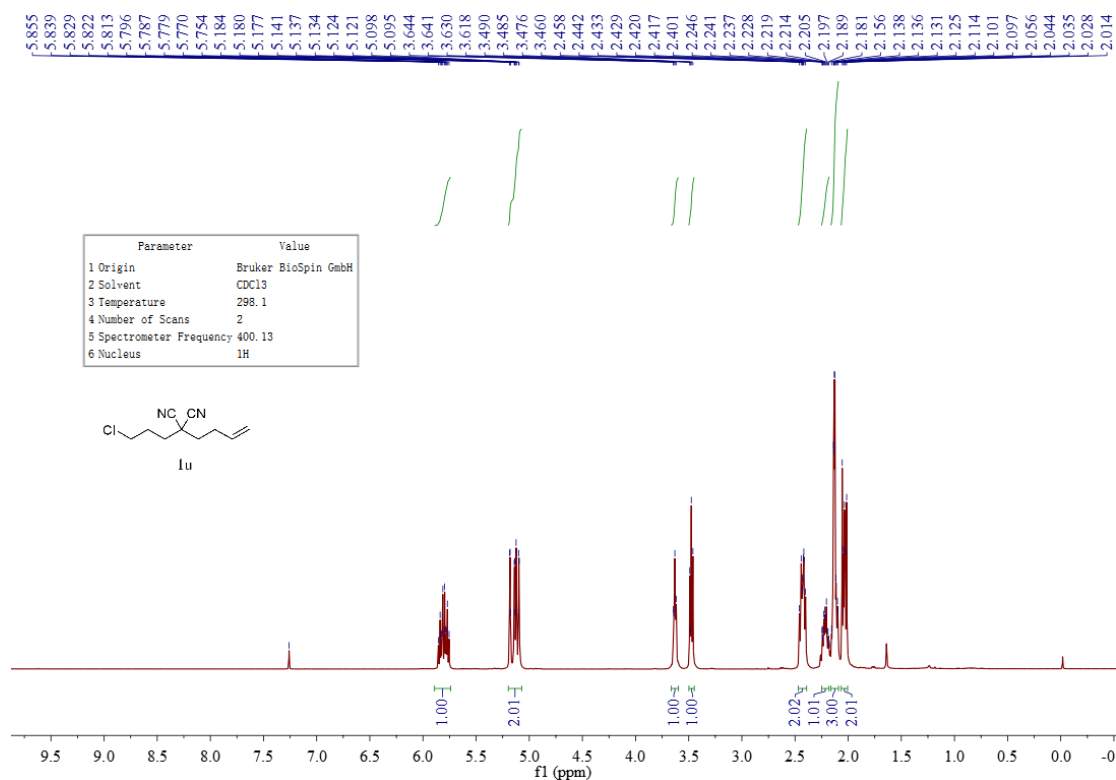

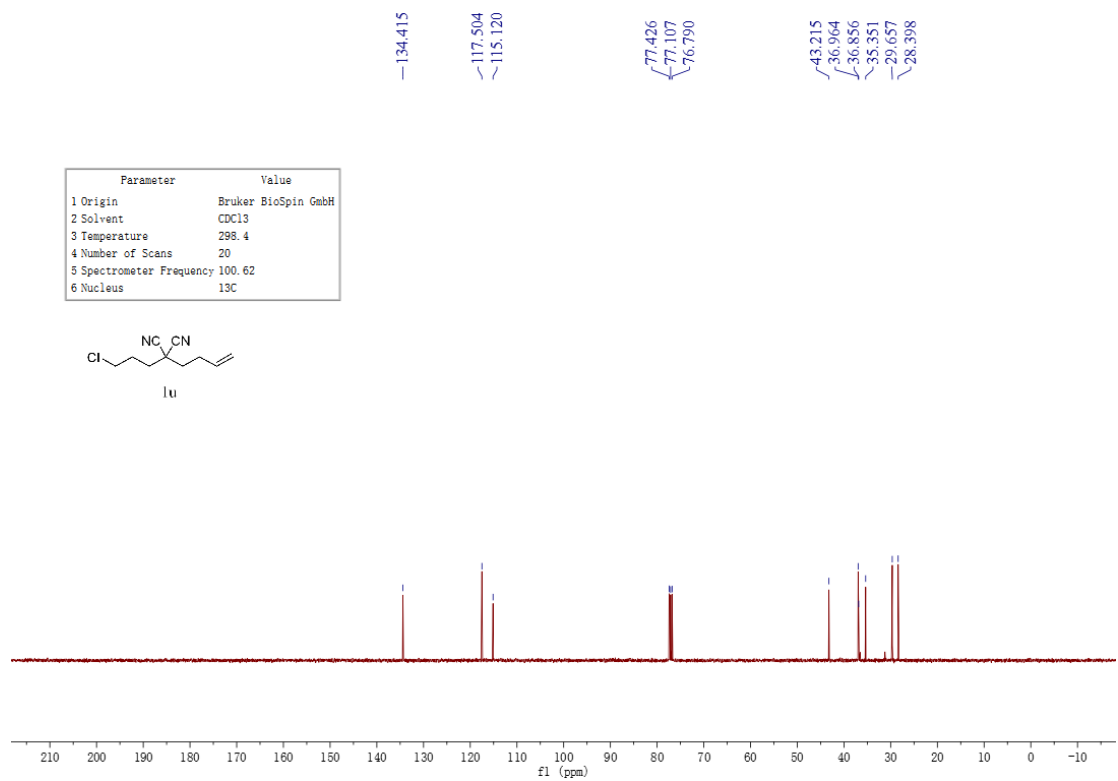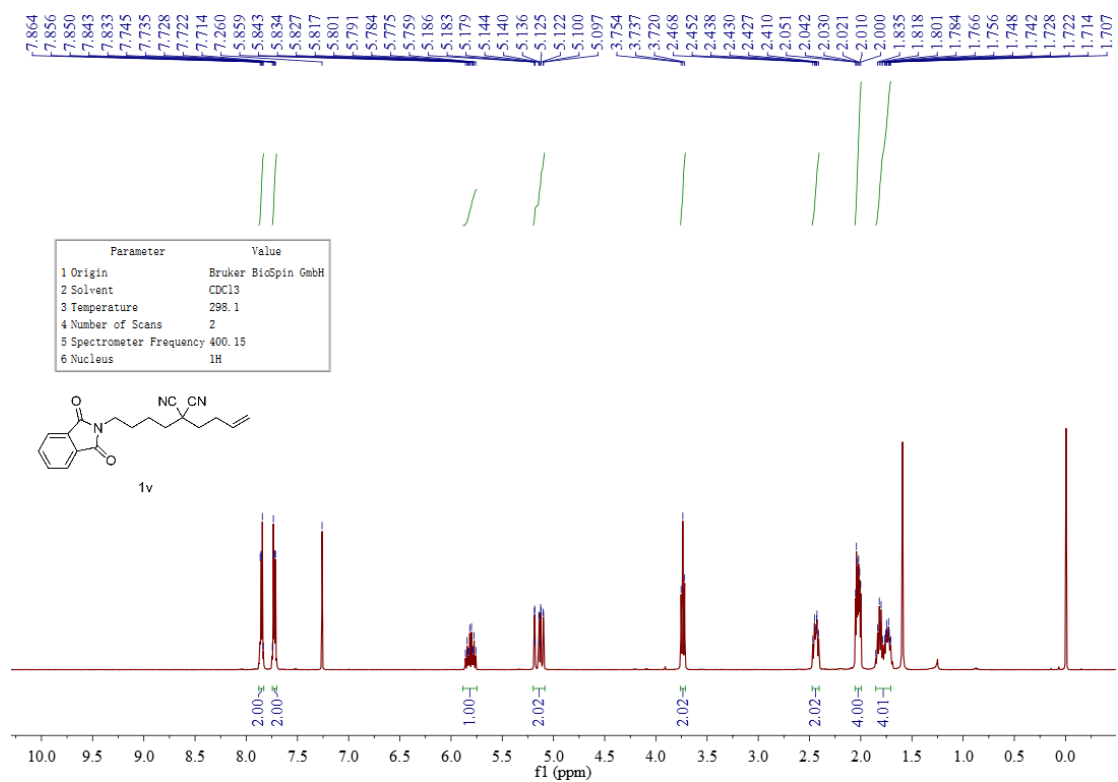

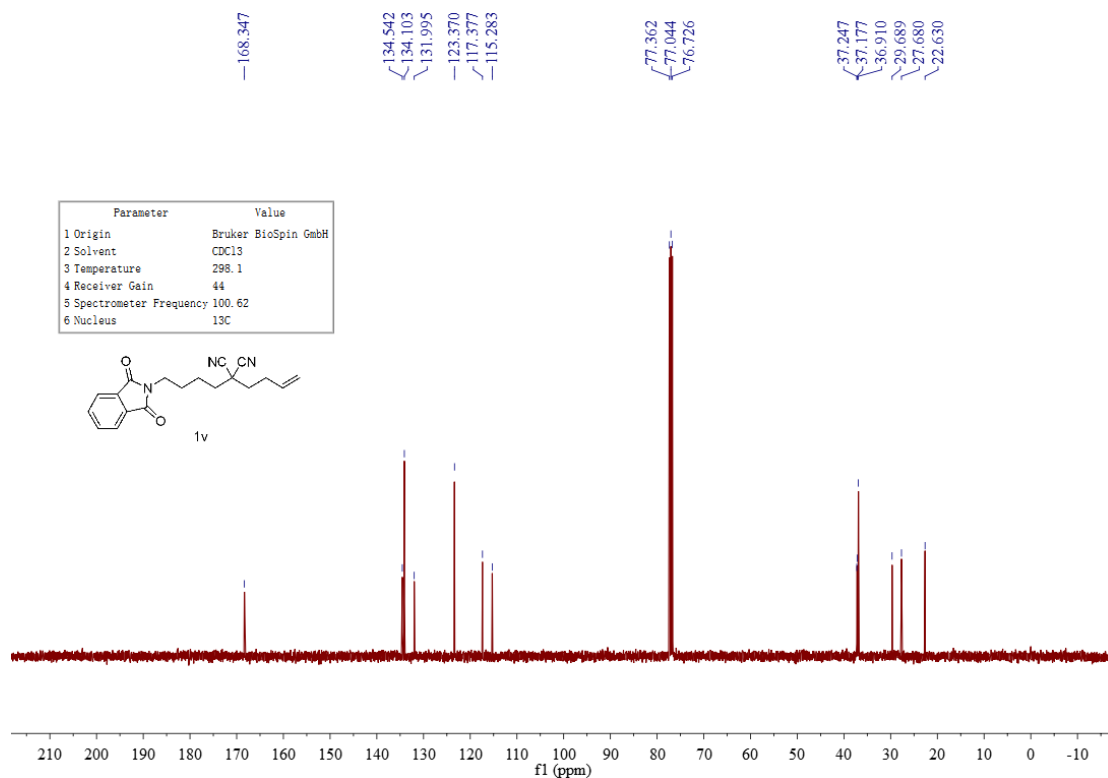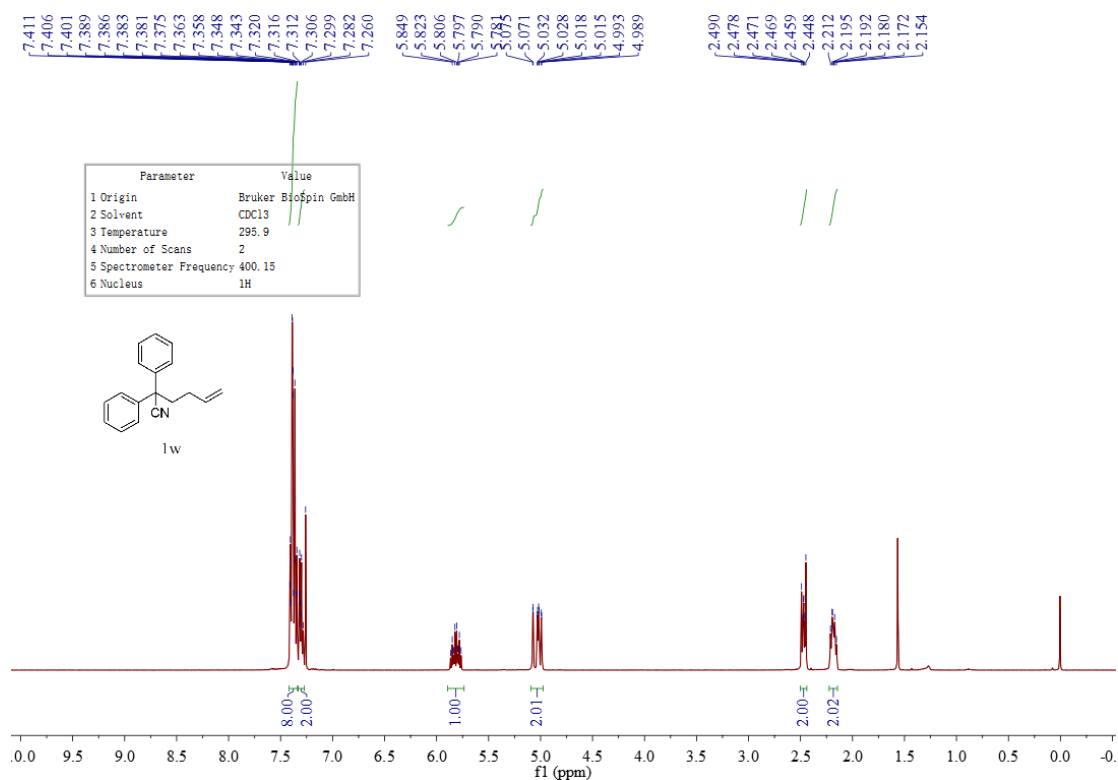

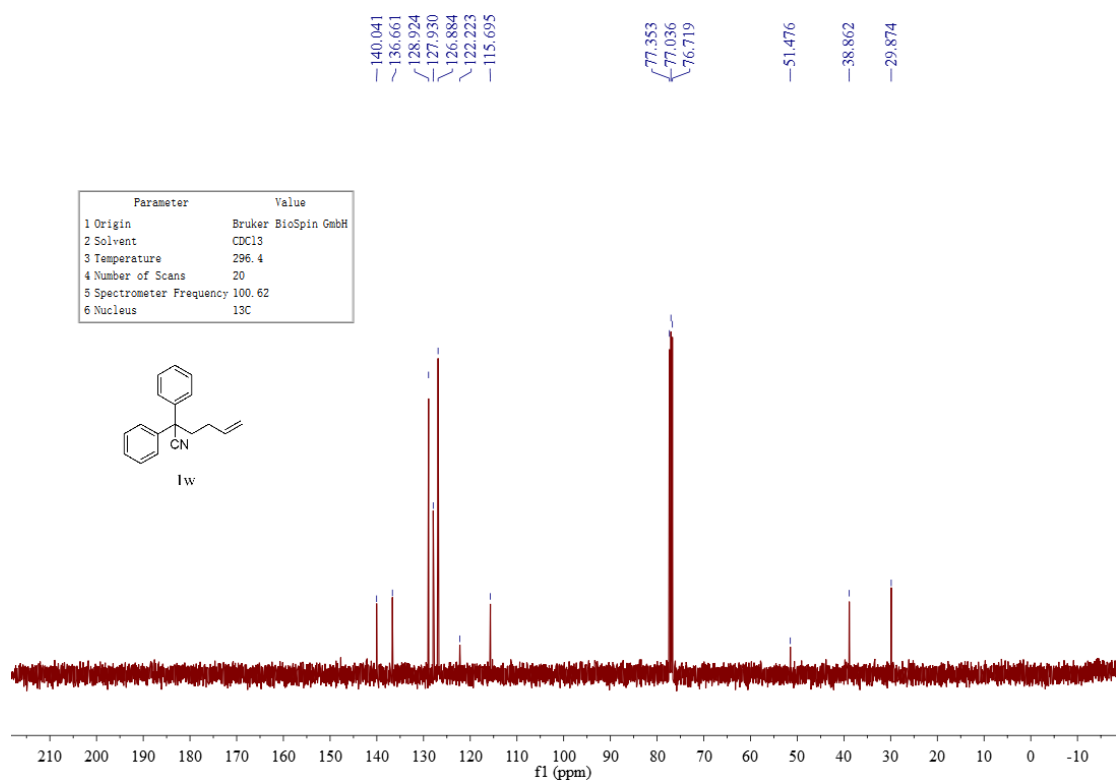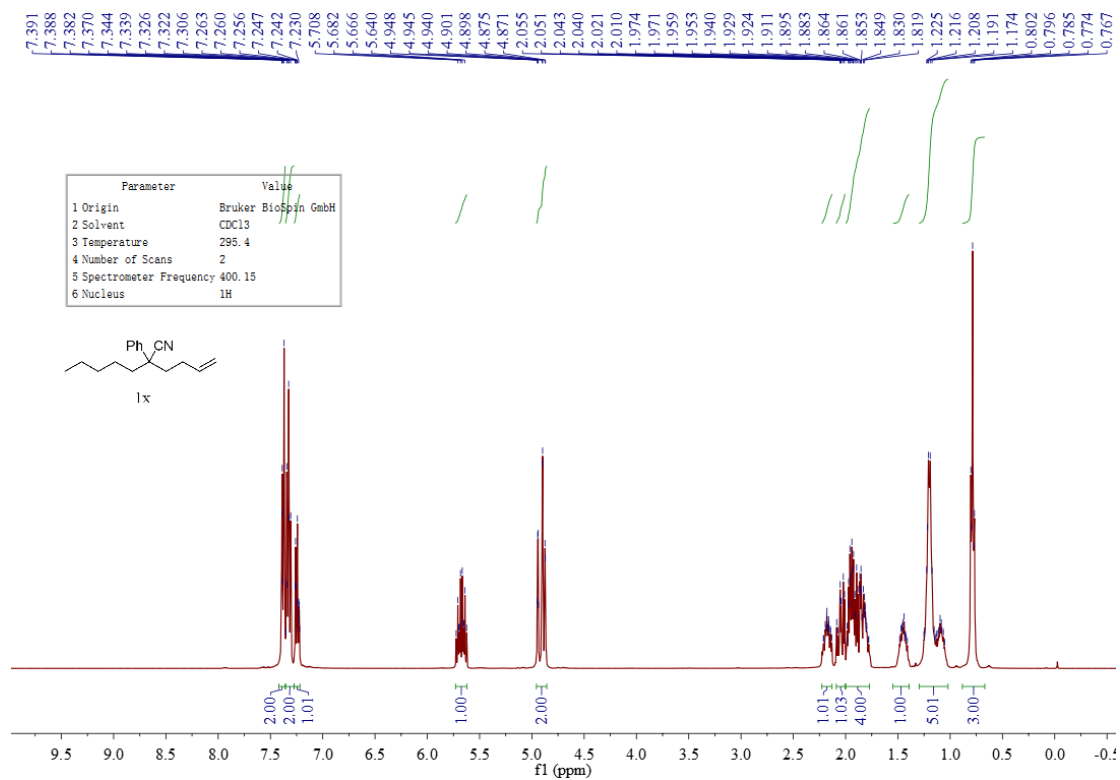

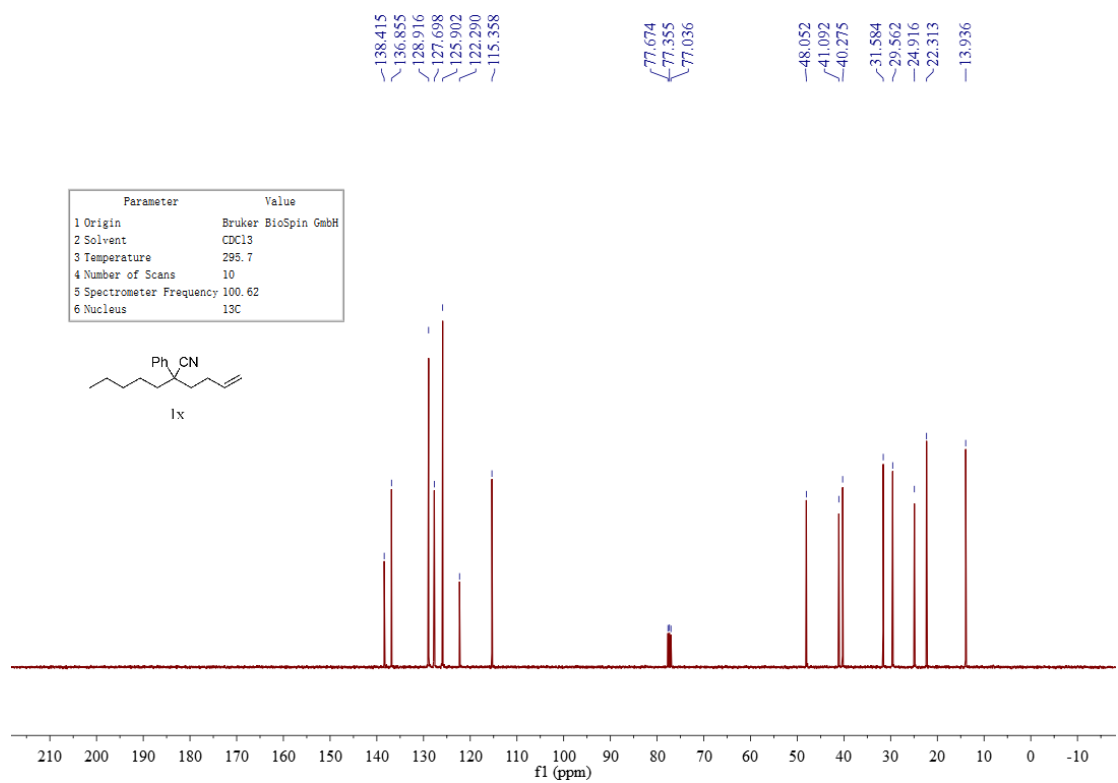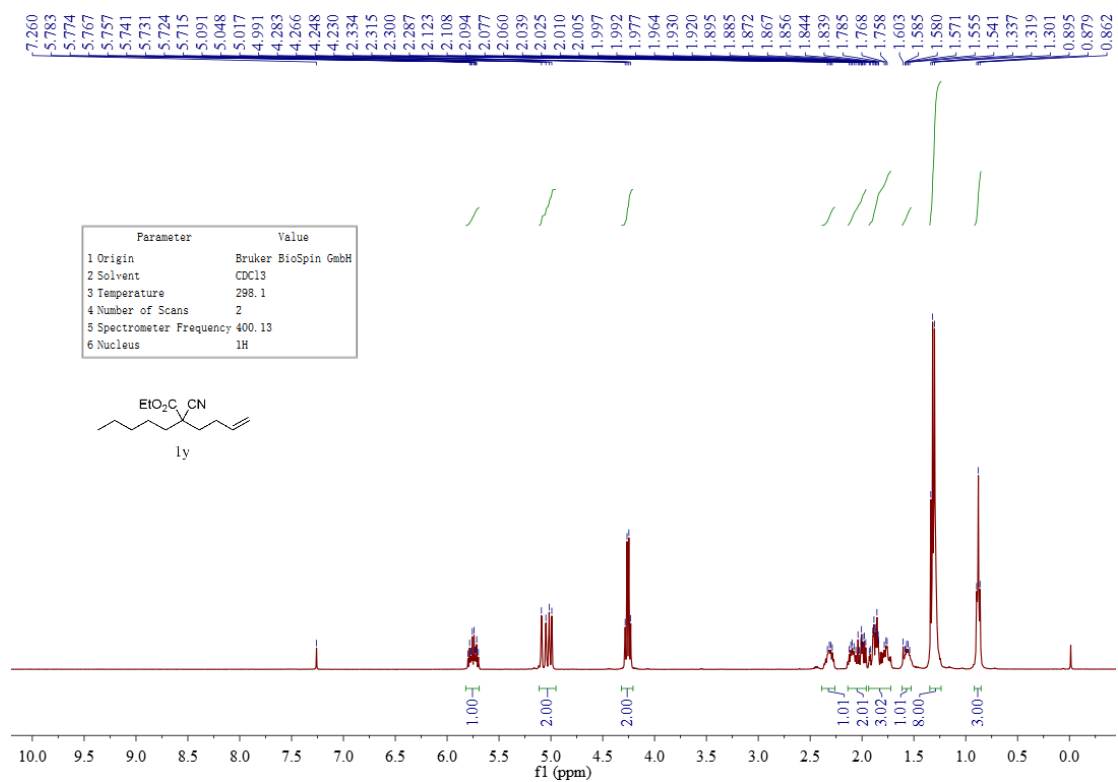

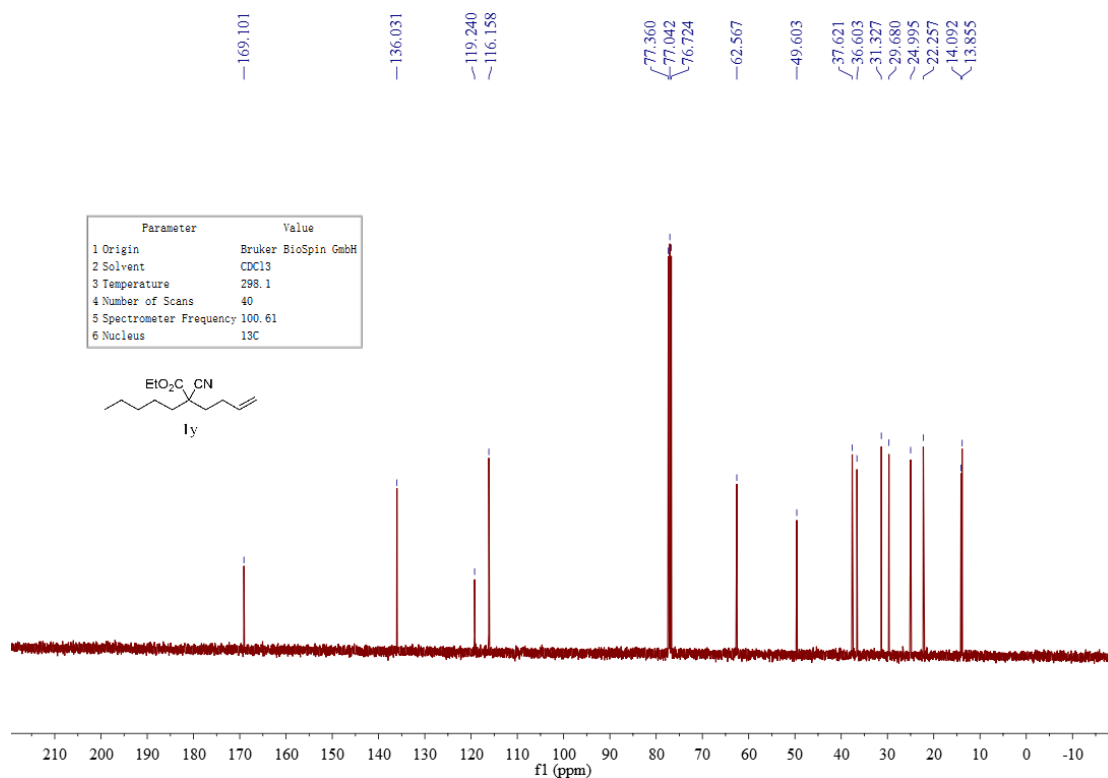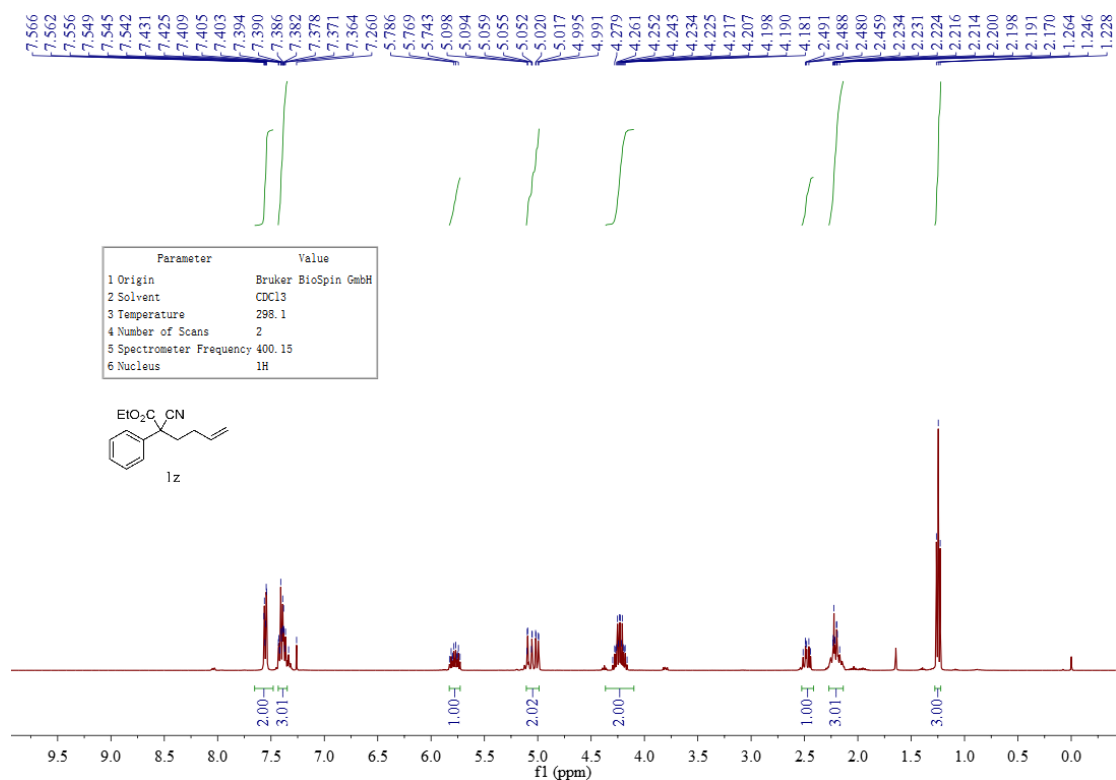

— 167.511  
 ✓ 136.032  
 — 134.479  
 — 126.043  
 ✓ 118.256  
 ✓ 116.133  
 77.390  
 77.073  
 76.755  
 — 63.216  
 — 53.844  
 — 37.282  
 — 29.701  
 — 13.820

| Parameter                | Value               |
|--------------------------|---------------------|
| 1 Origin                 | Bruker BioSpin GmbH |
| 2 Solvent                | CDCl <sub>3</sub>   |
| 3 Temperature            | 298.2               |
| 4 Number of Scans        | 20                  |
| 5 Spectrometer Frequency | 100.62              |
| 6 Nucleus                | <sup>13</sup> C     |

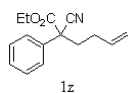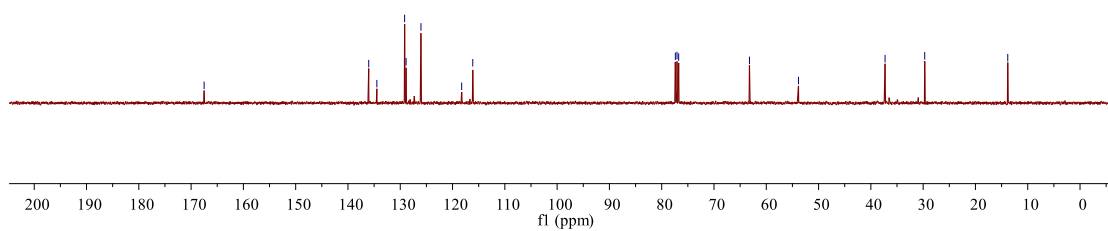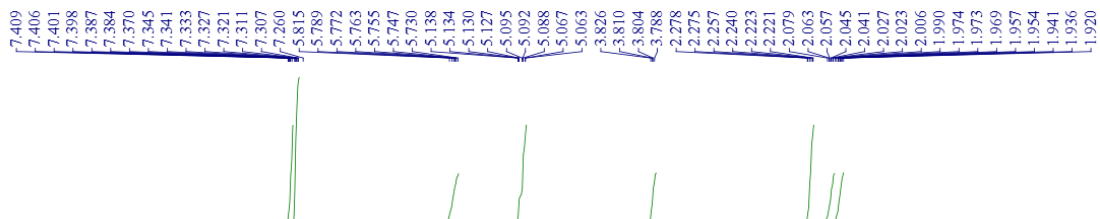

| Parameter                | Value               |
|--------------------------|---------------------|
| 1 Origin                 | Bruker BioSpin GmbH |
| 2 Solvent                | CDCl <sub>3</sub>   |
| 3 Temperature            | 295.6               |
| 4 Number of Scans        | 2                   |
| 5 Spectrometer Frequency | 400.13              |
| 6 Nucleus                | <sup>1</sup> H      |

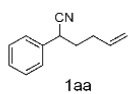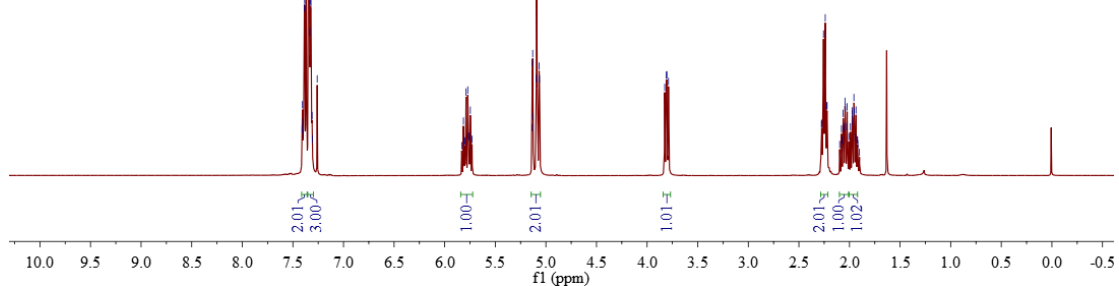

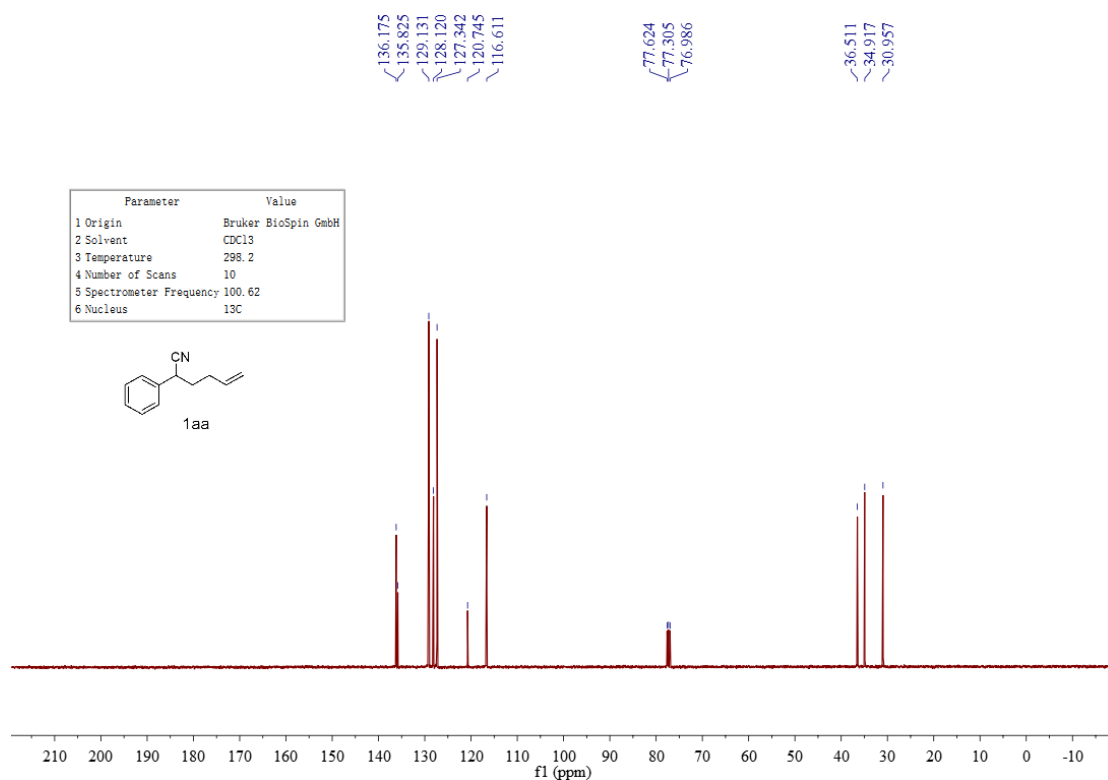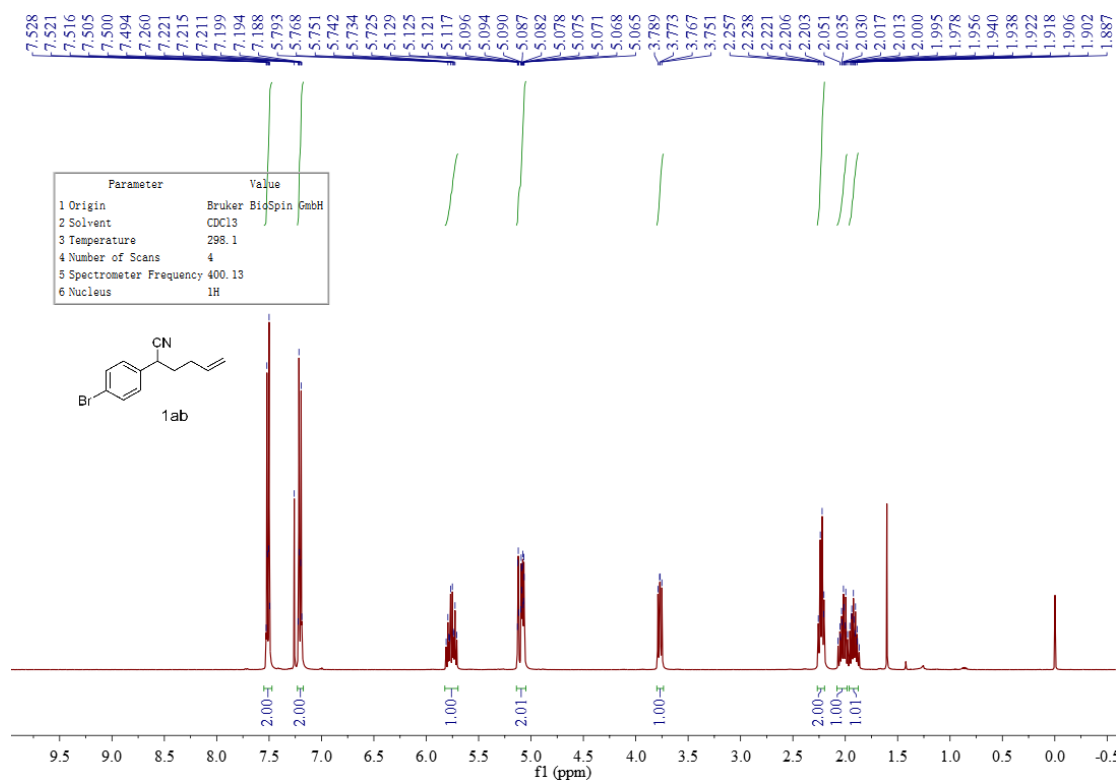

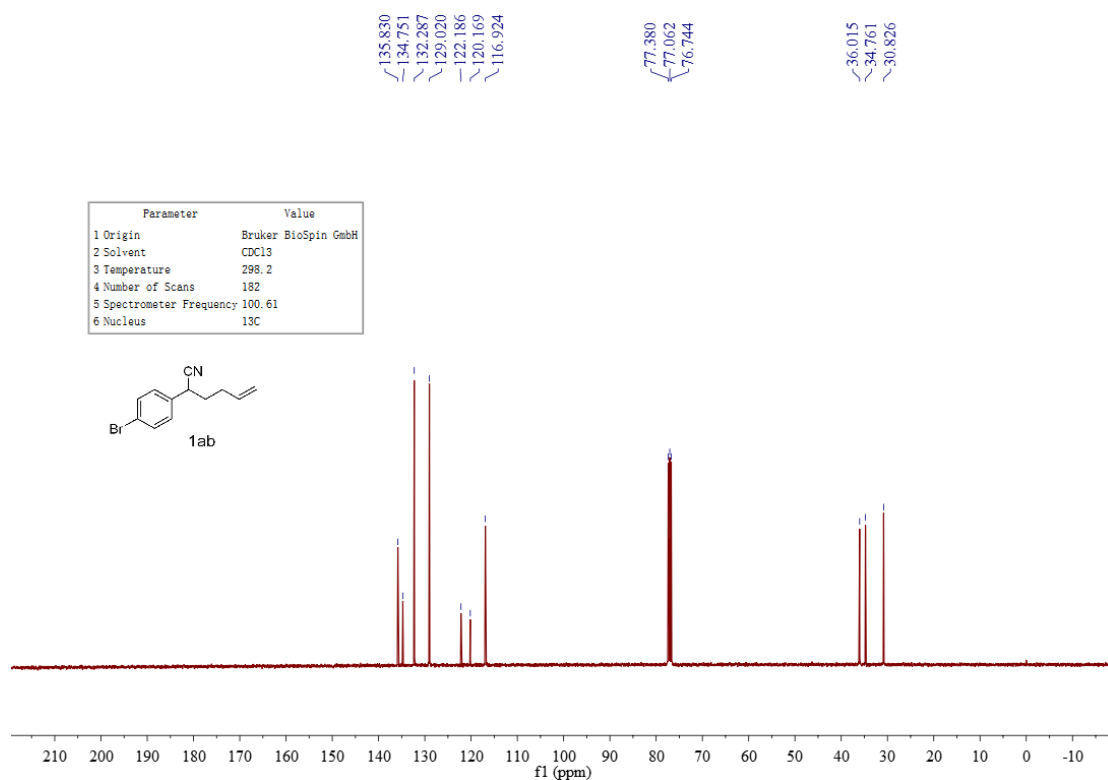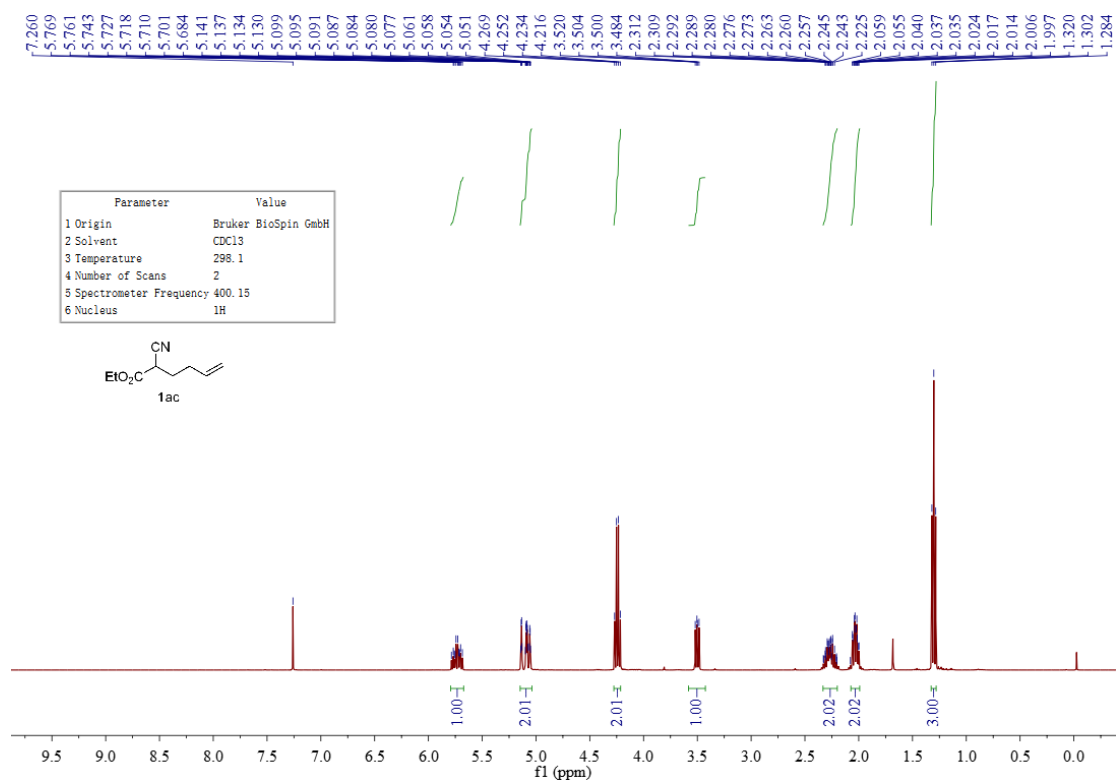

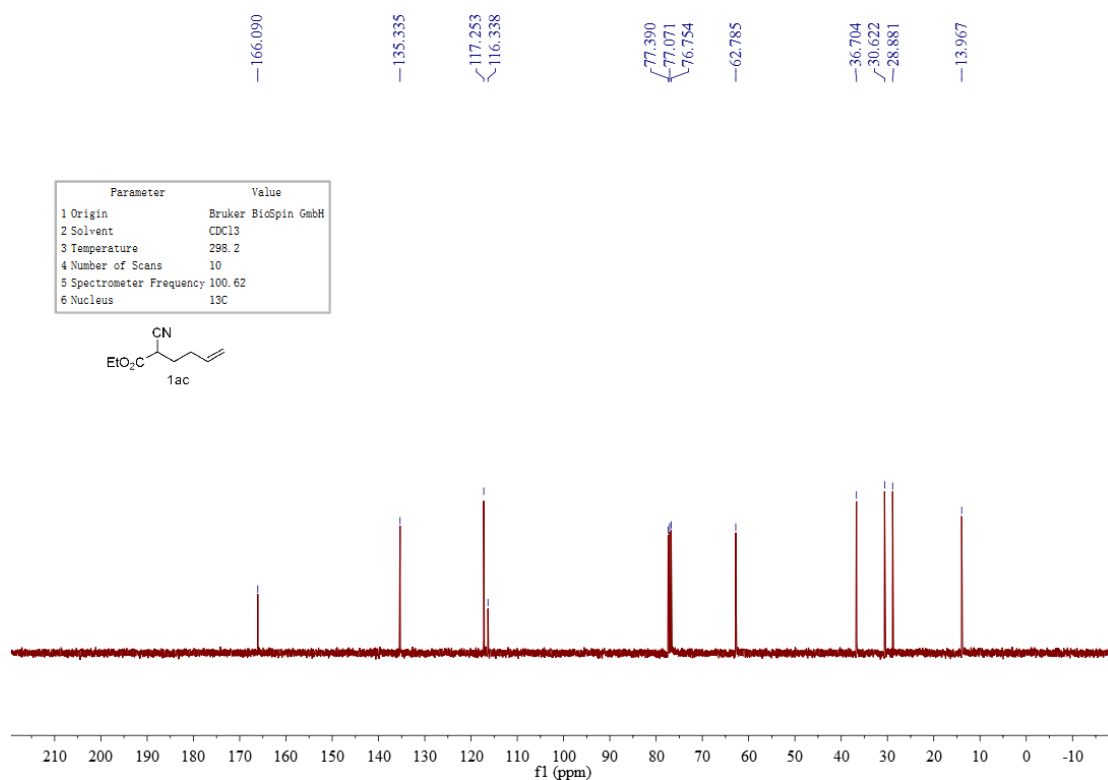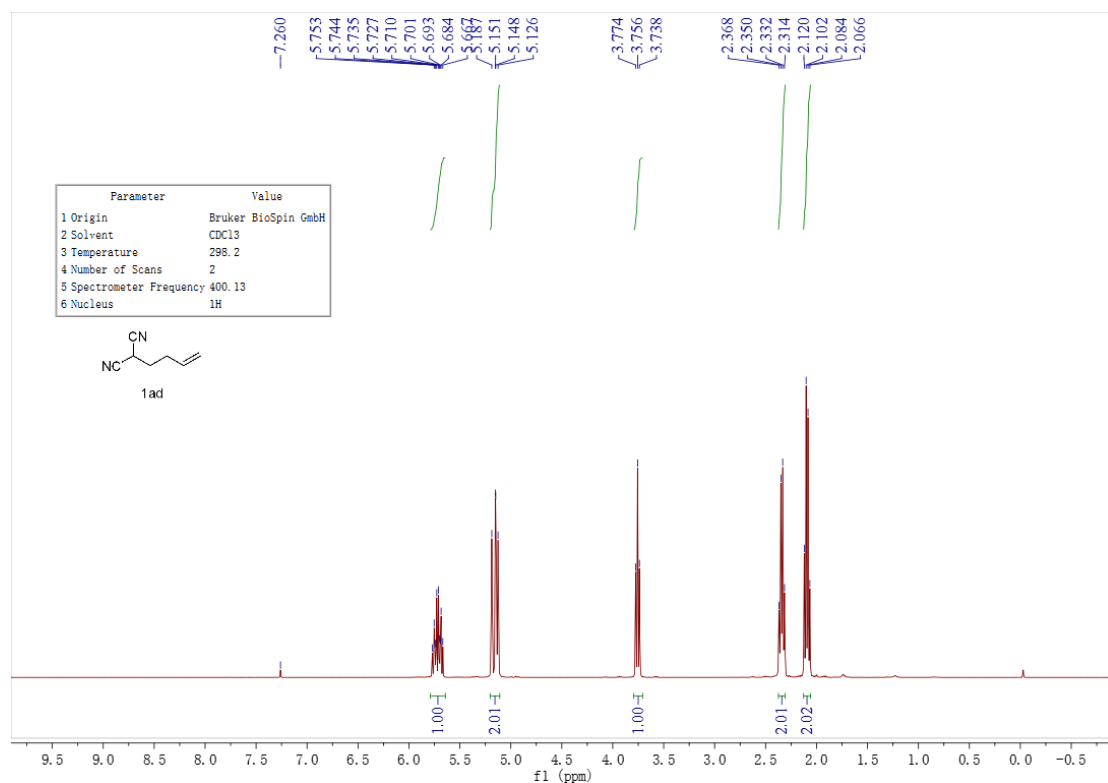



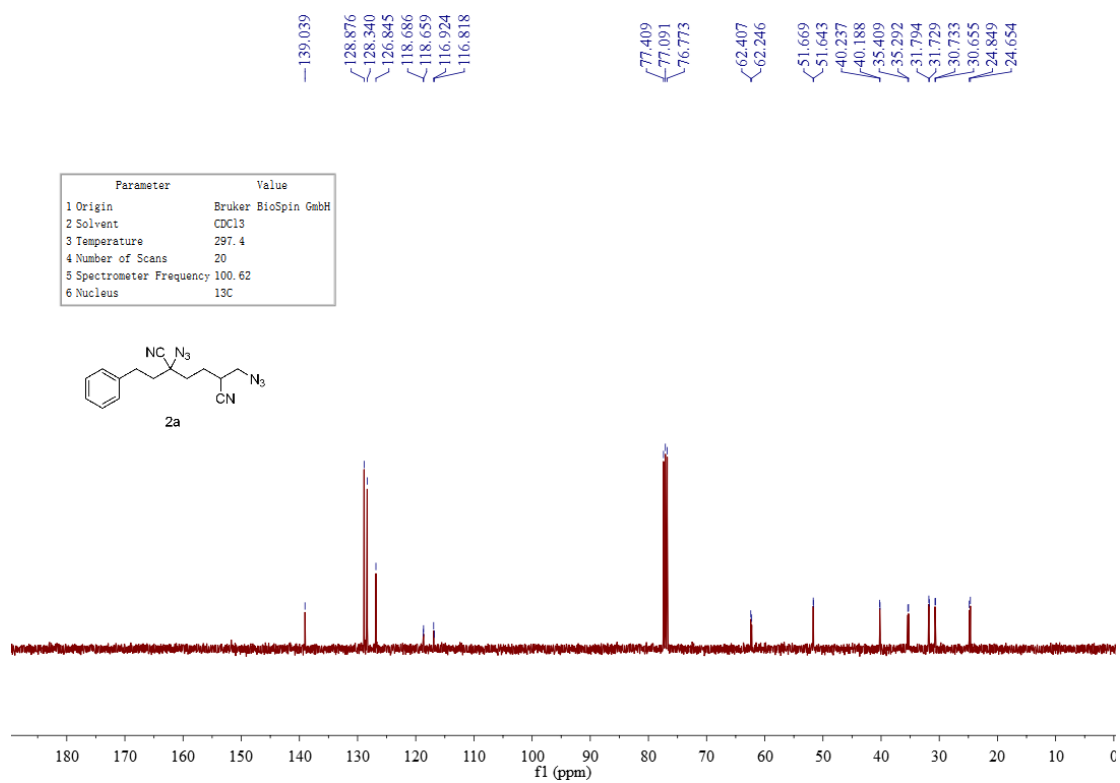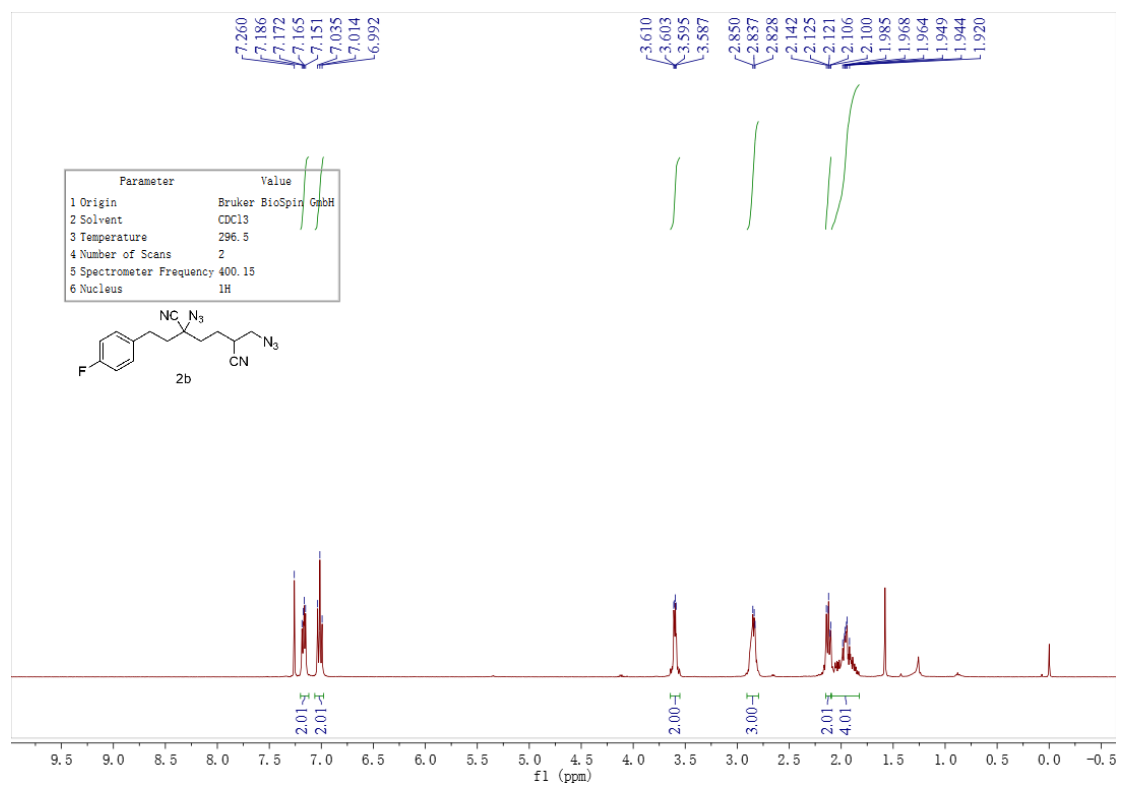

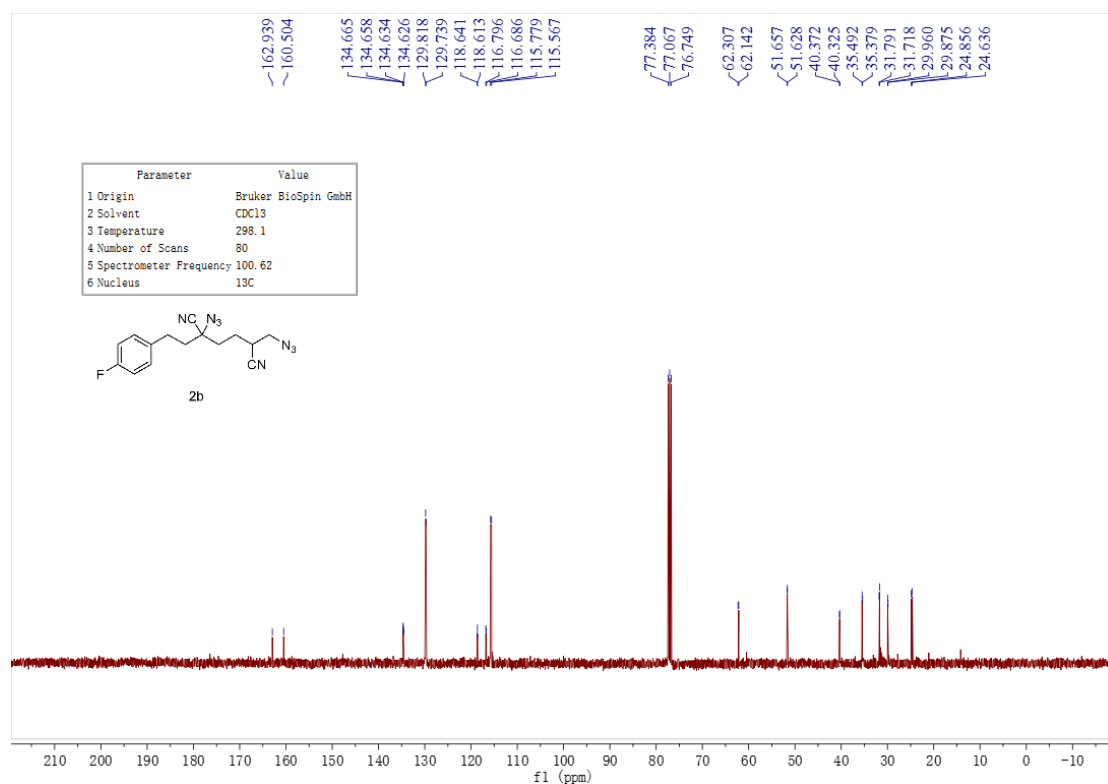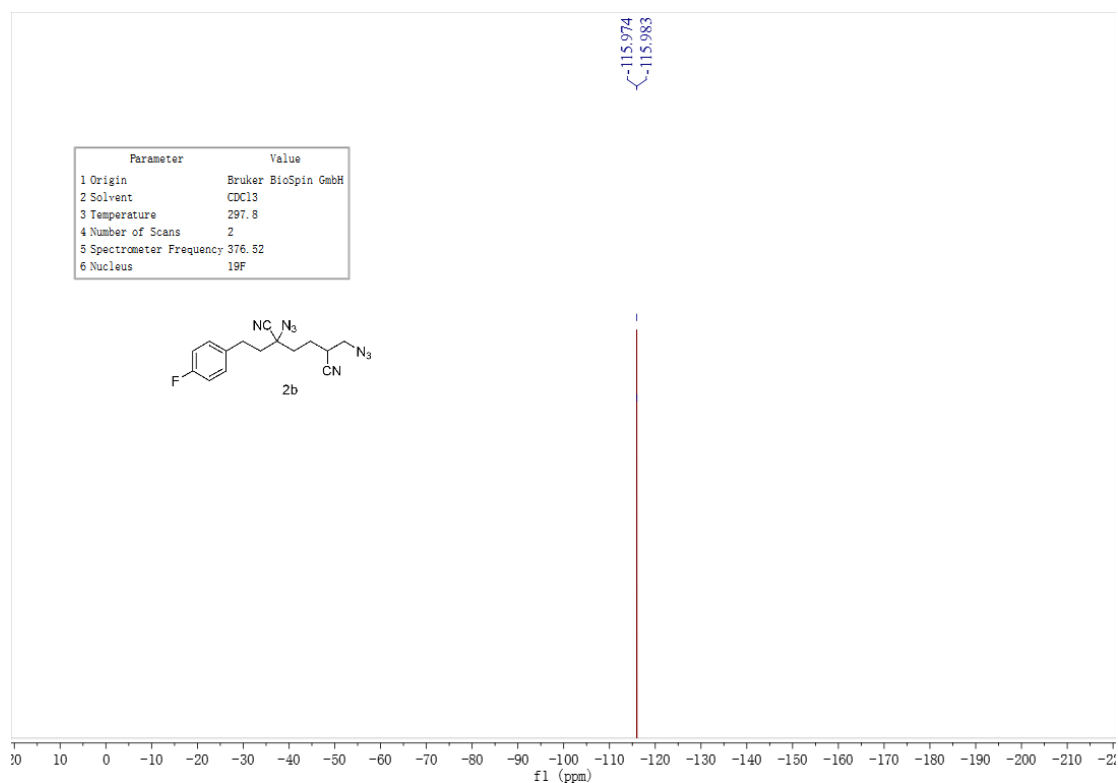



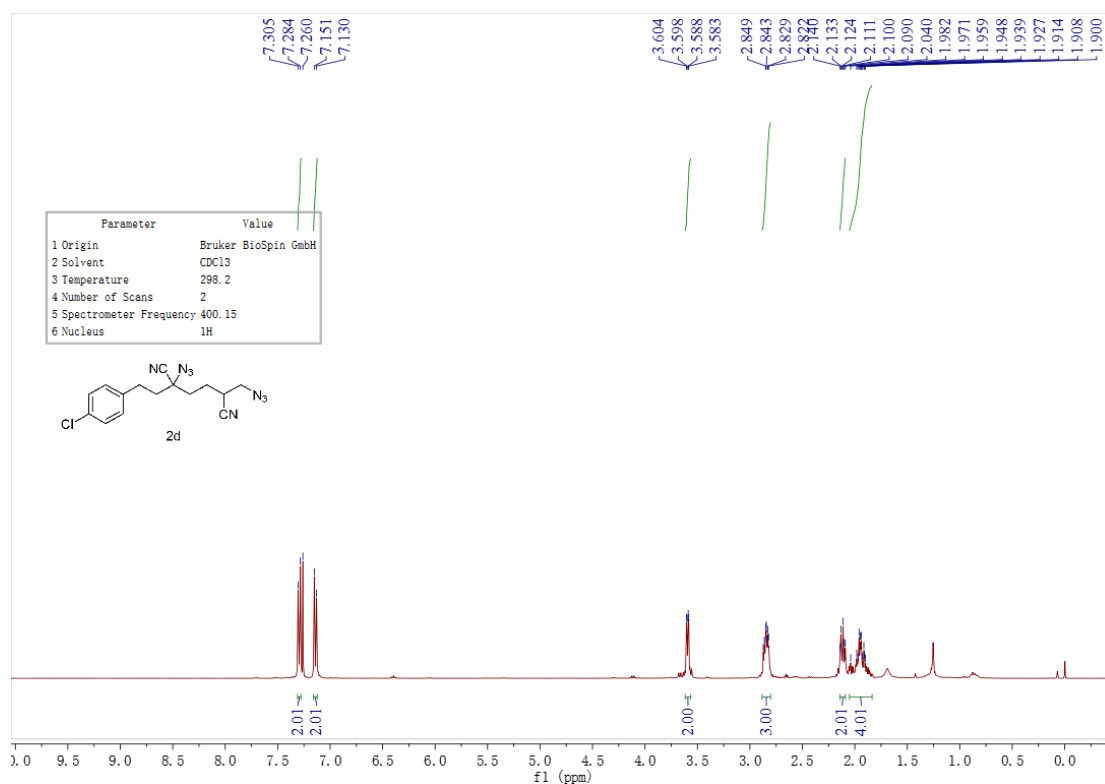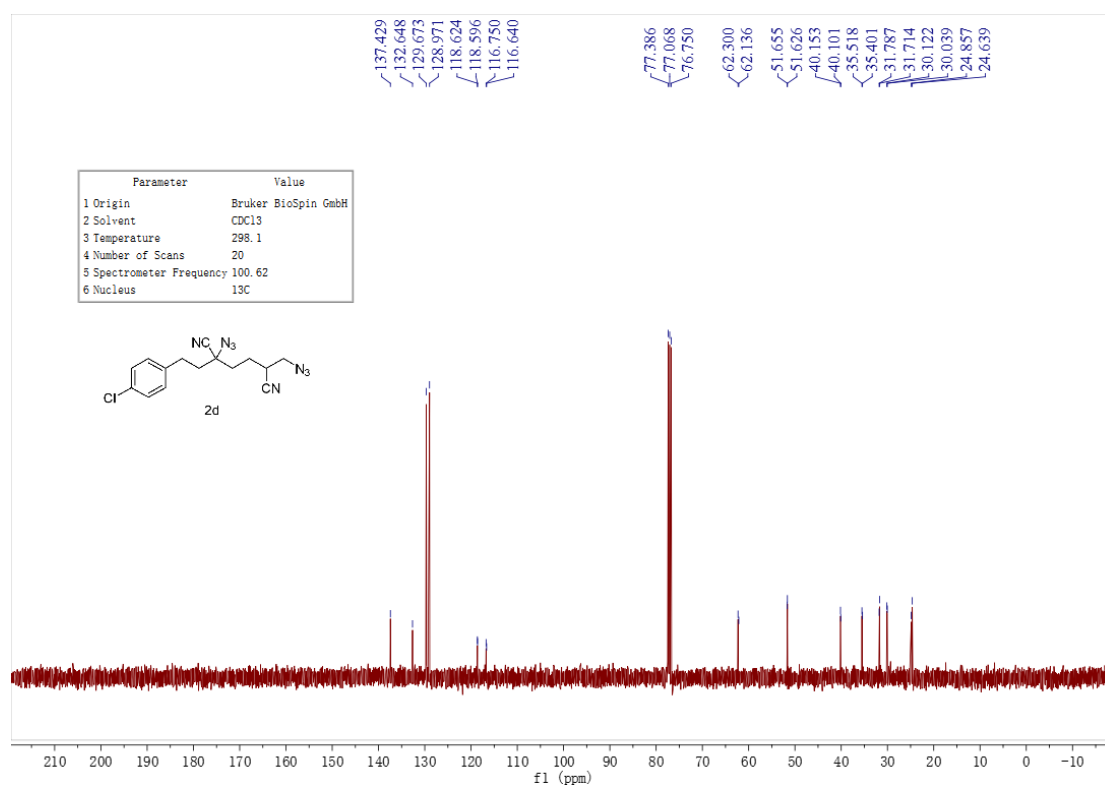

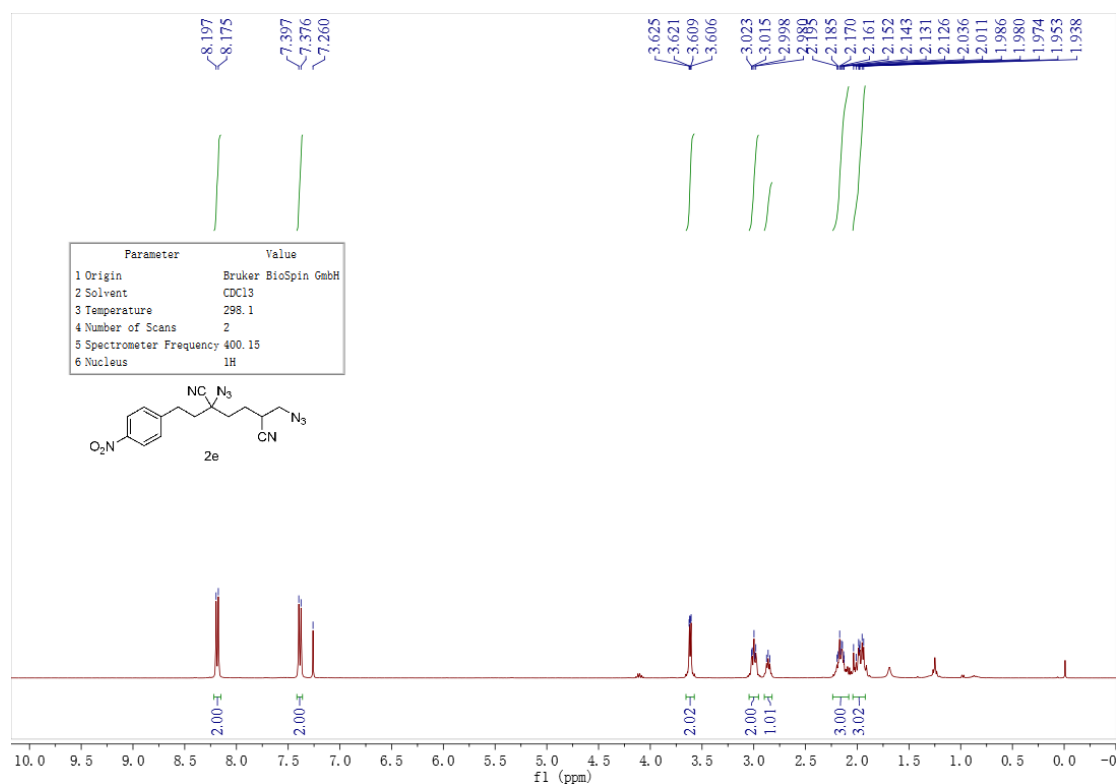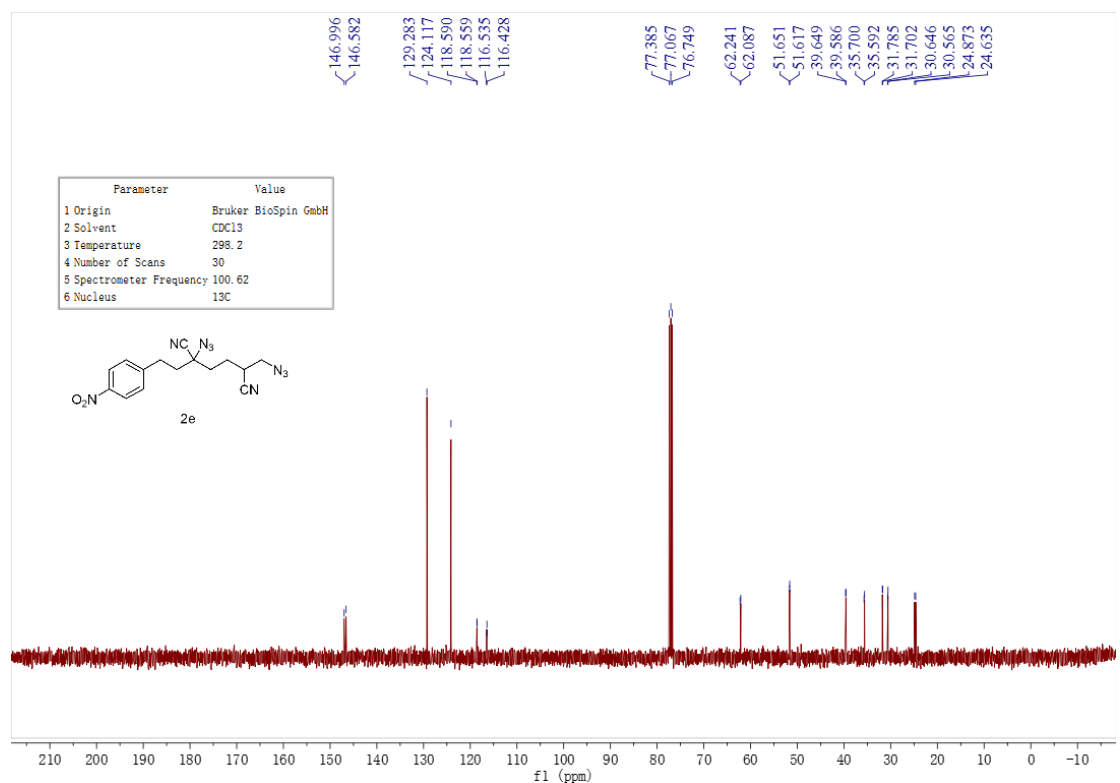

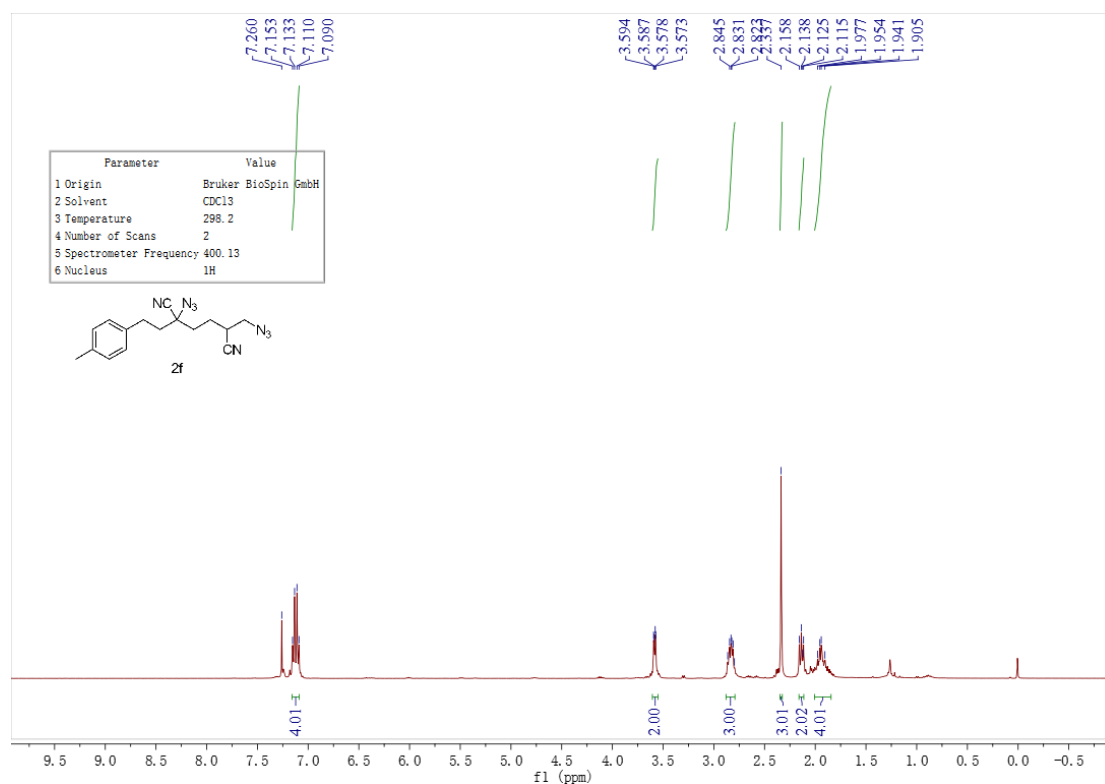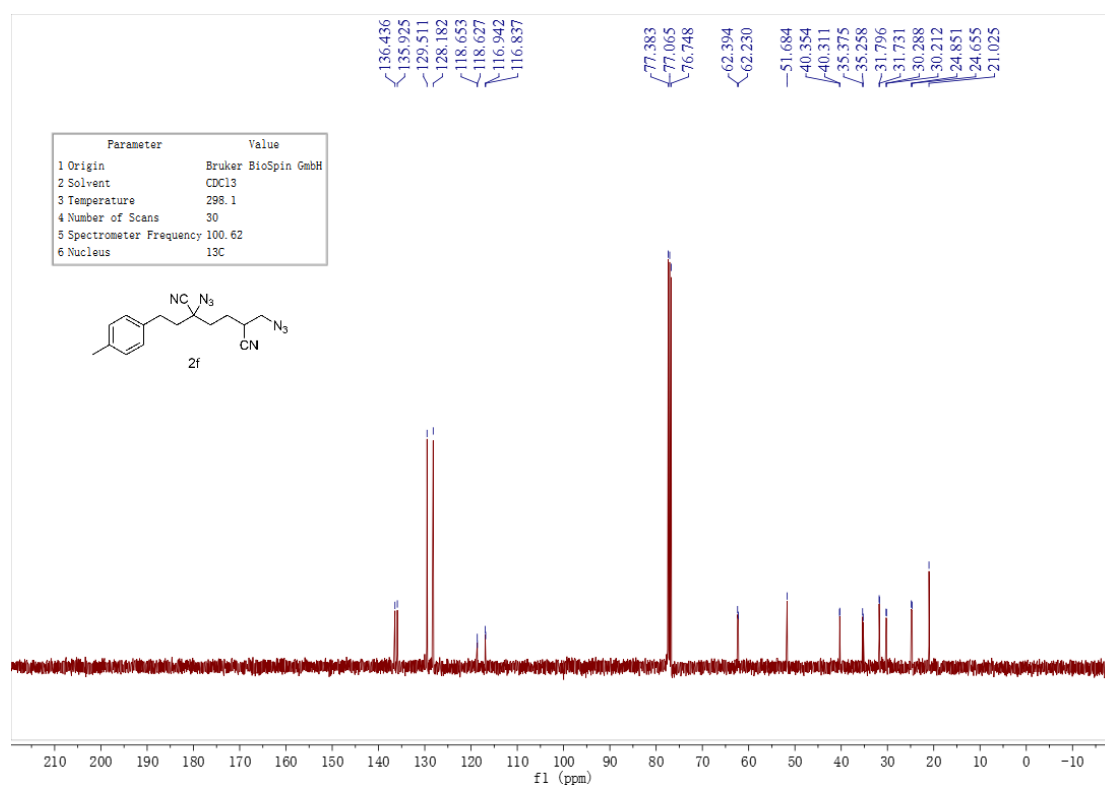

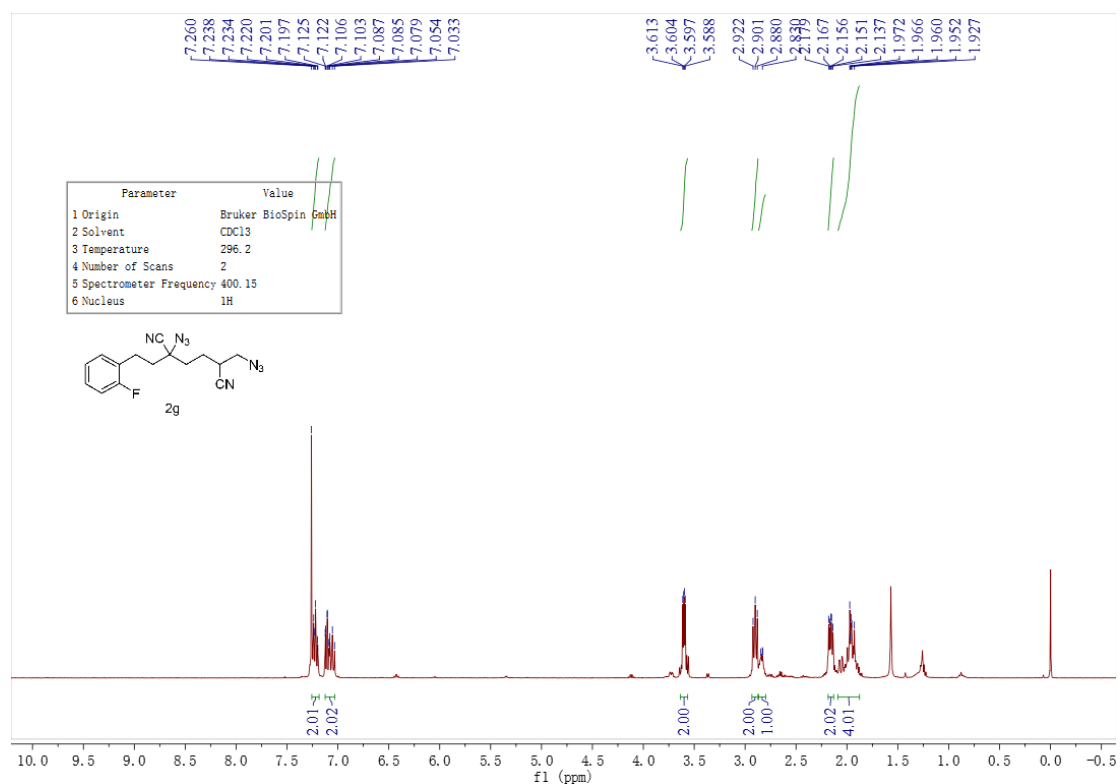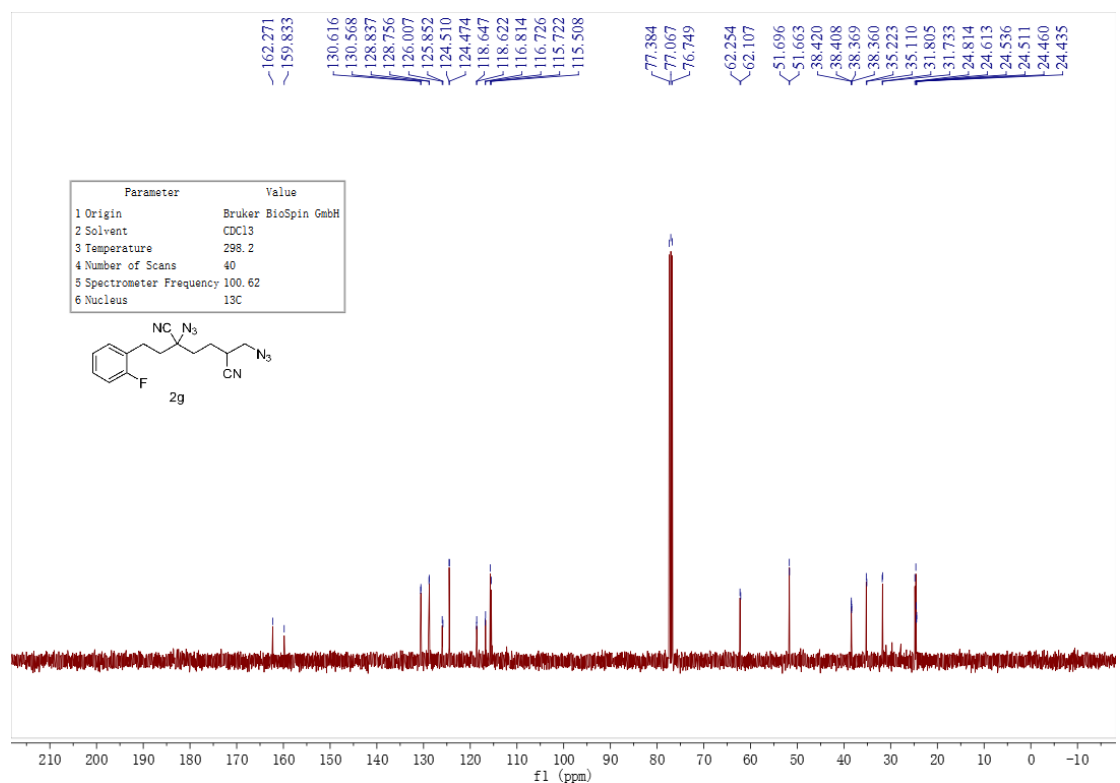

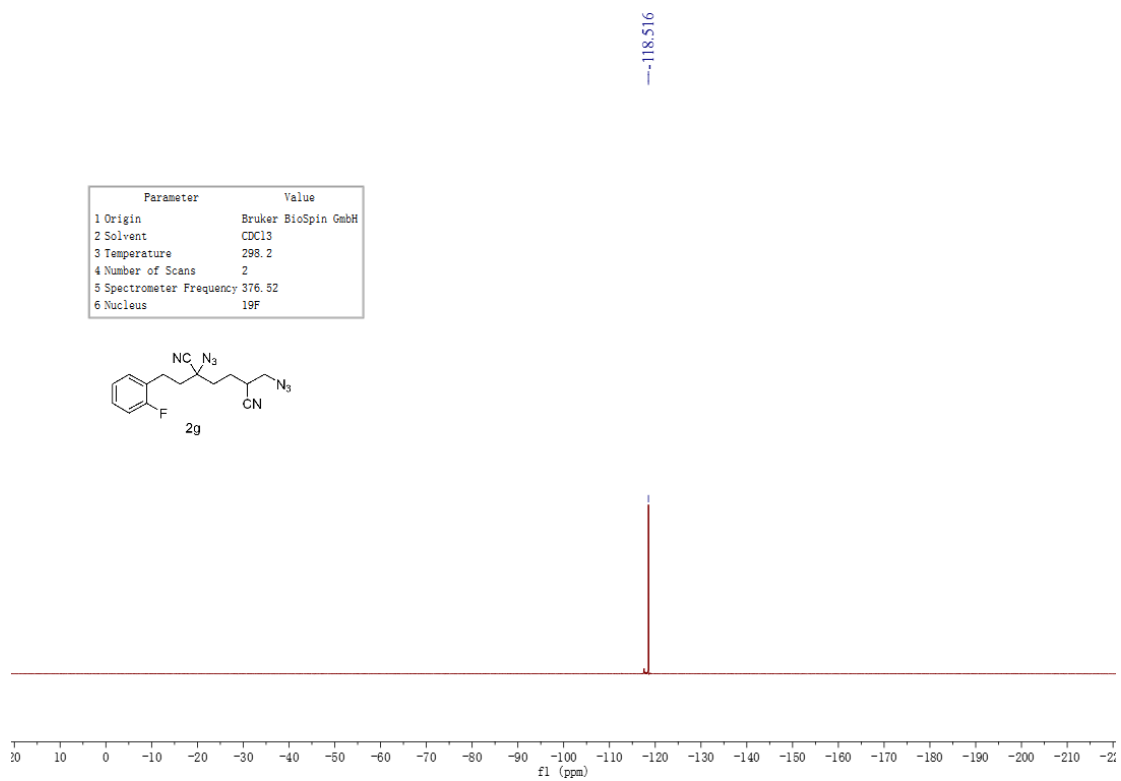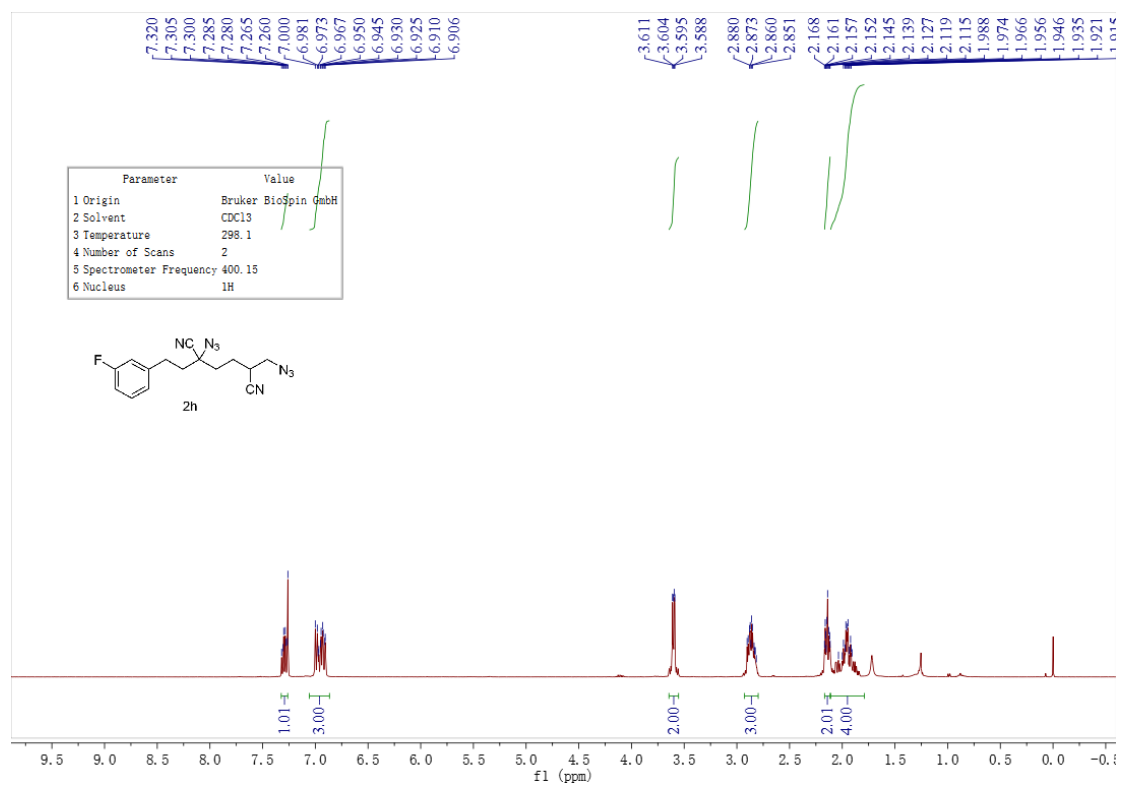

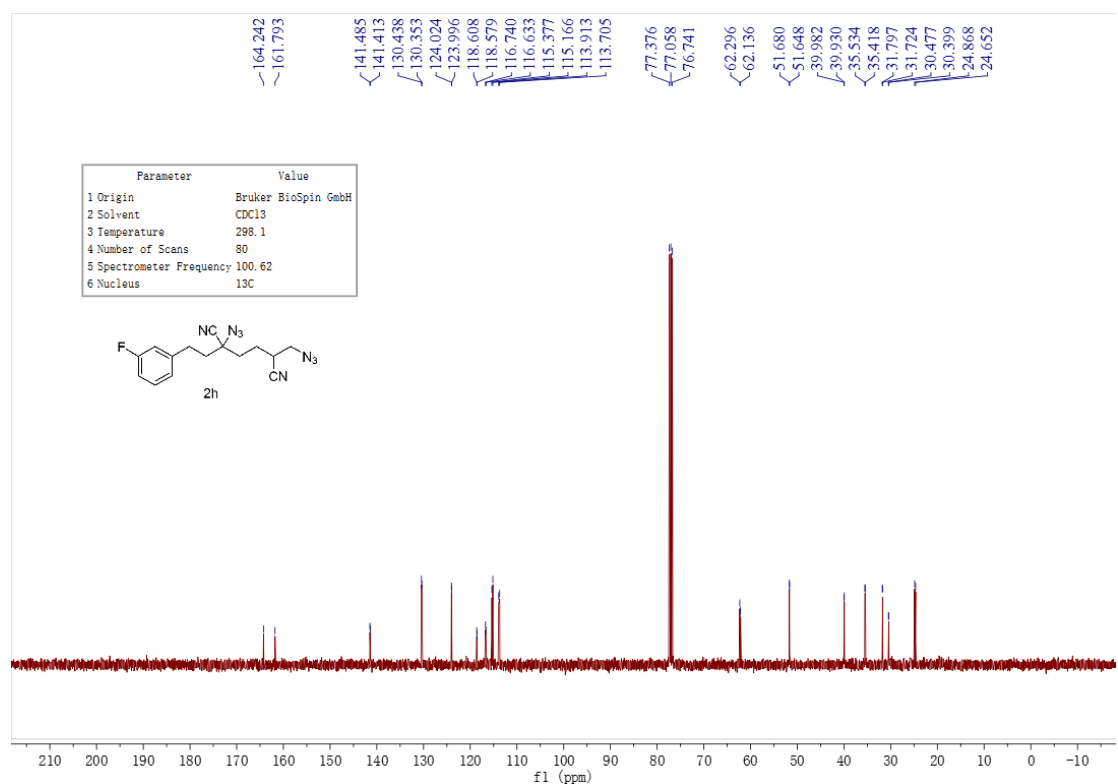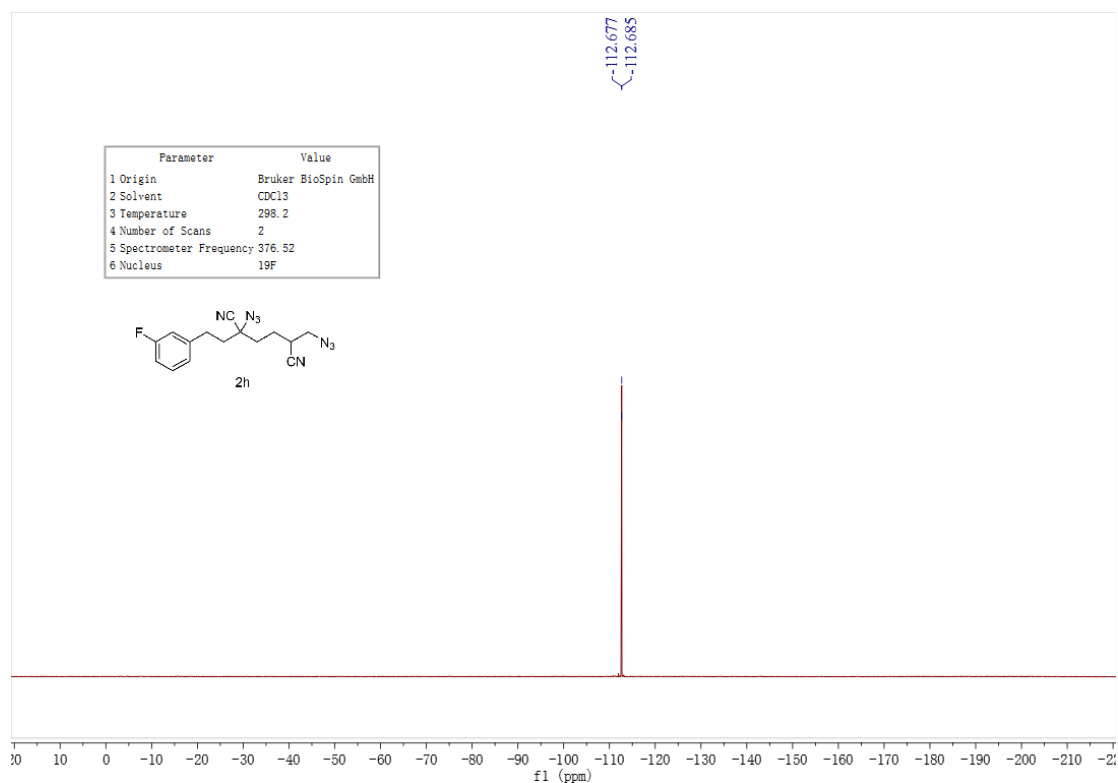

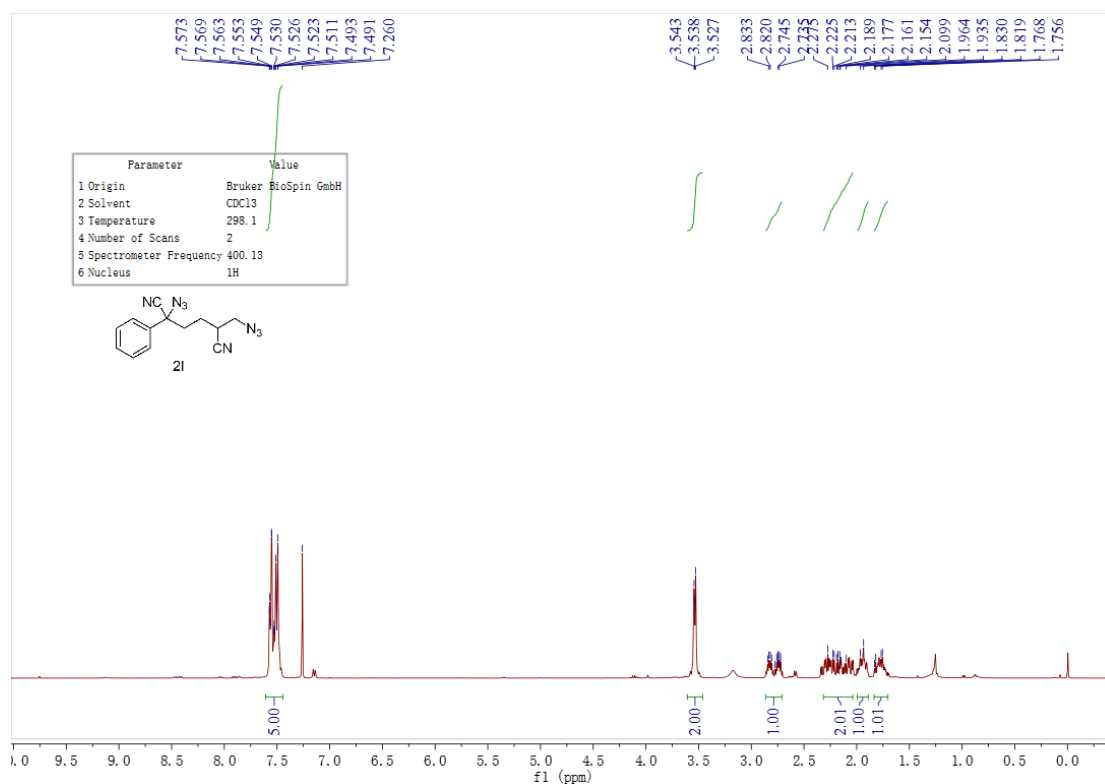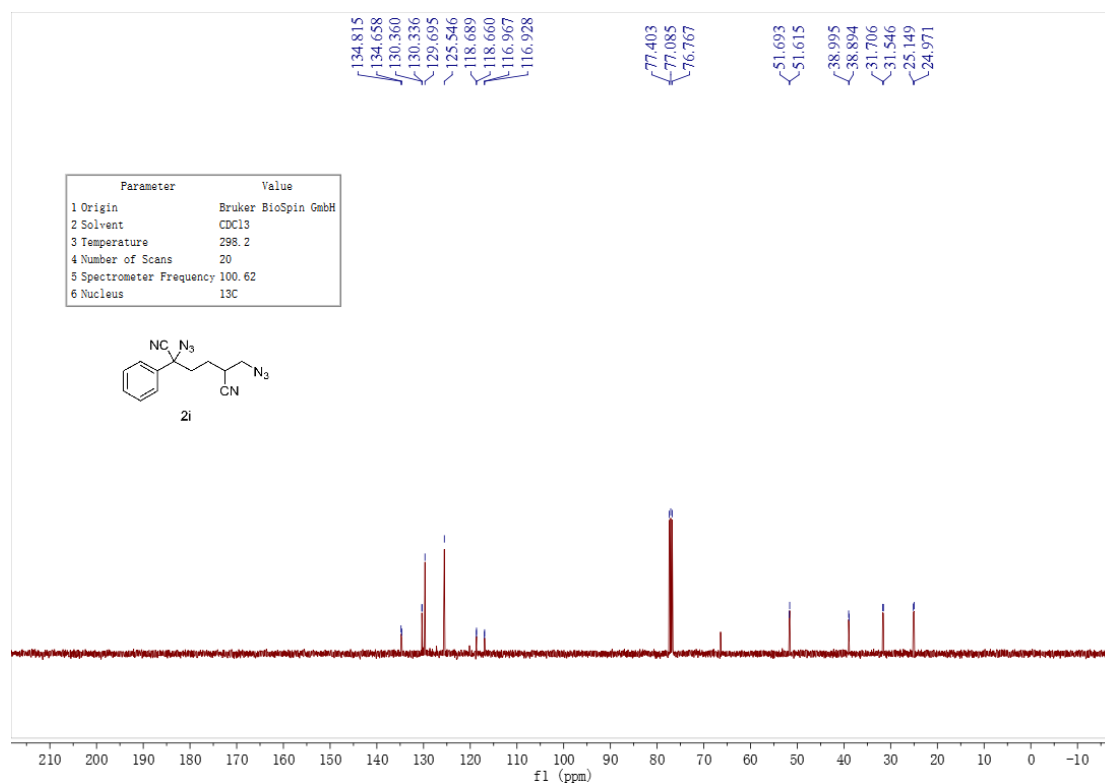

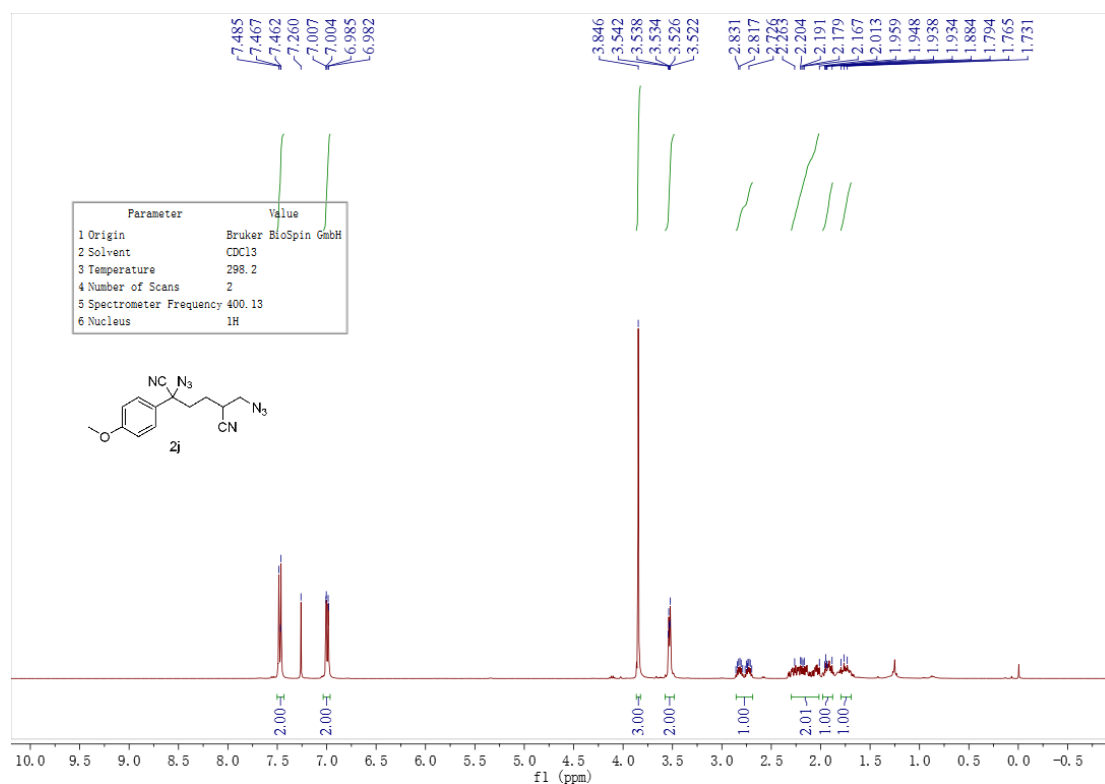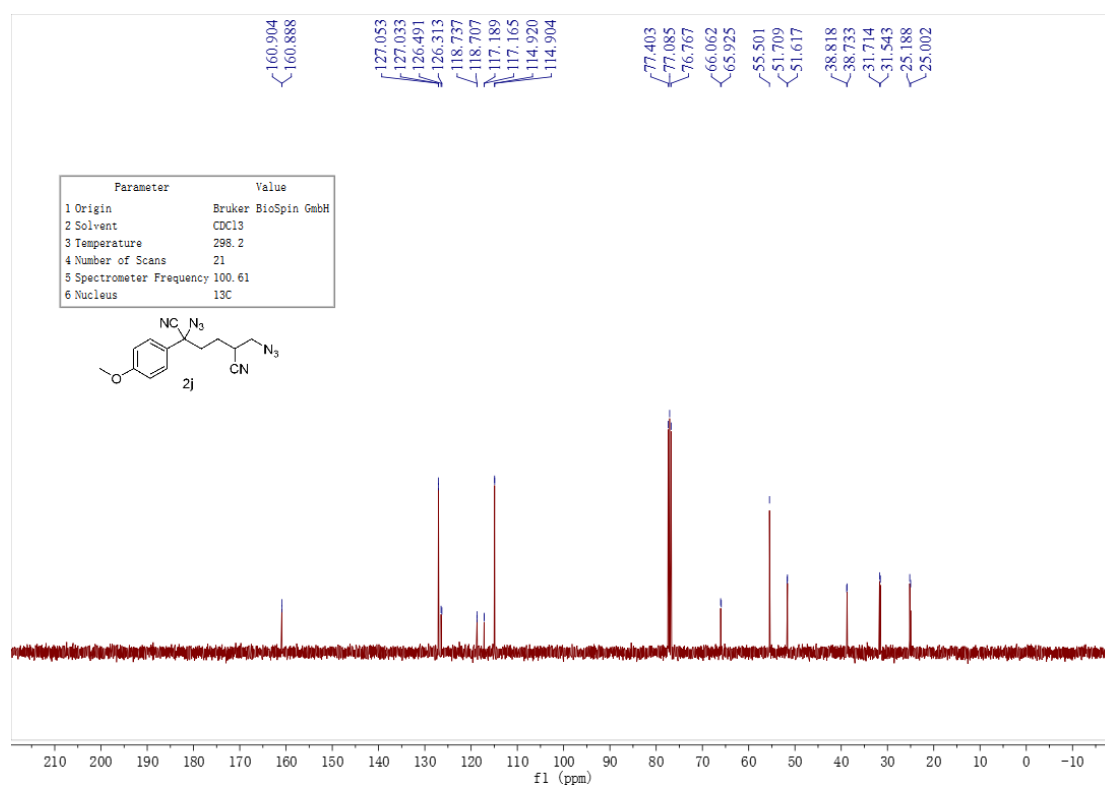

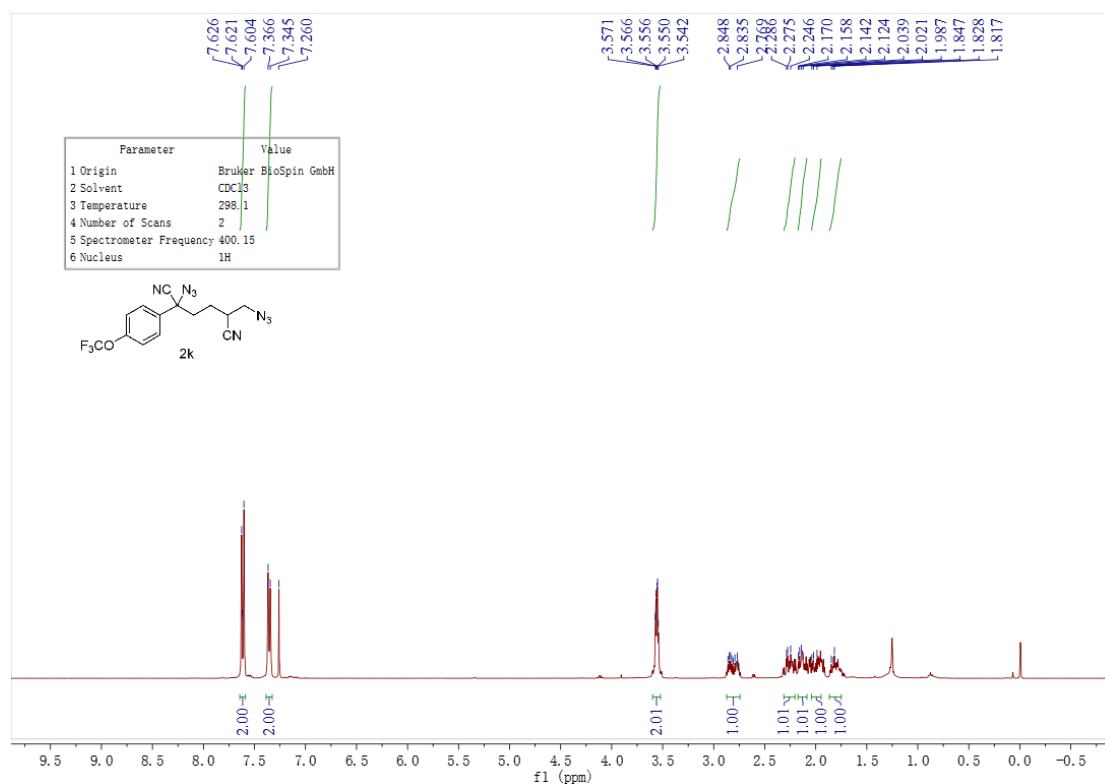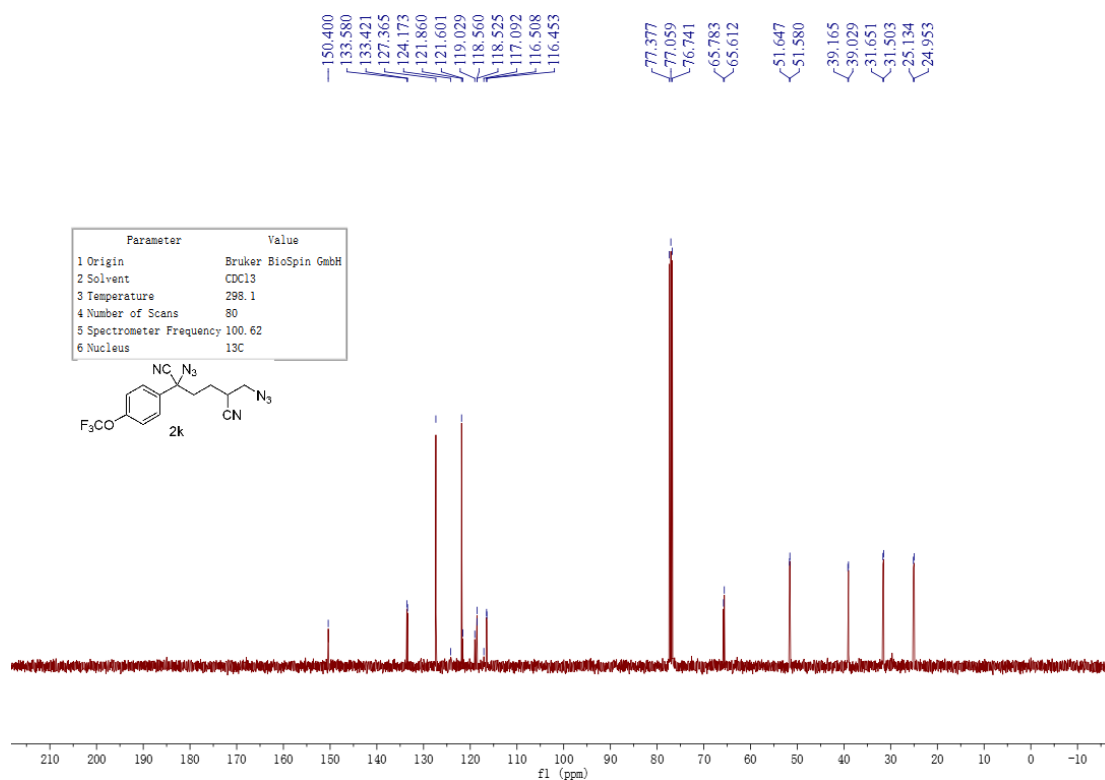

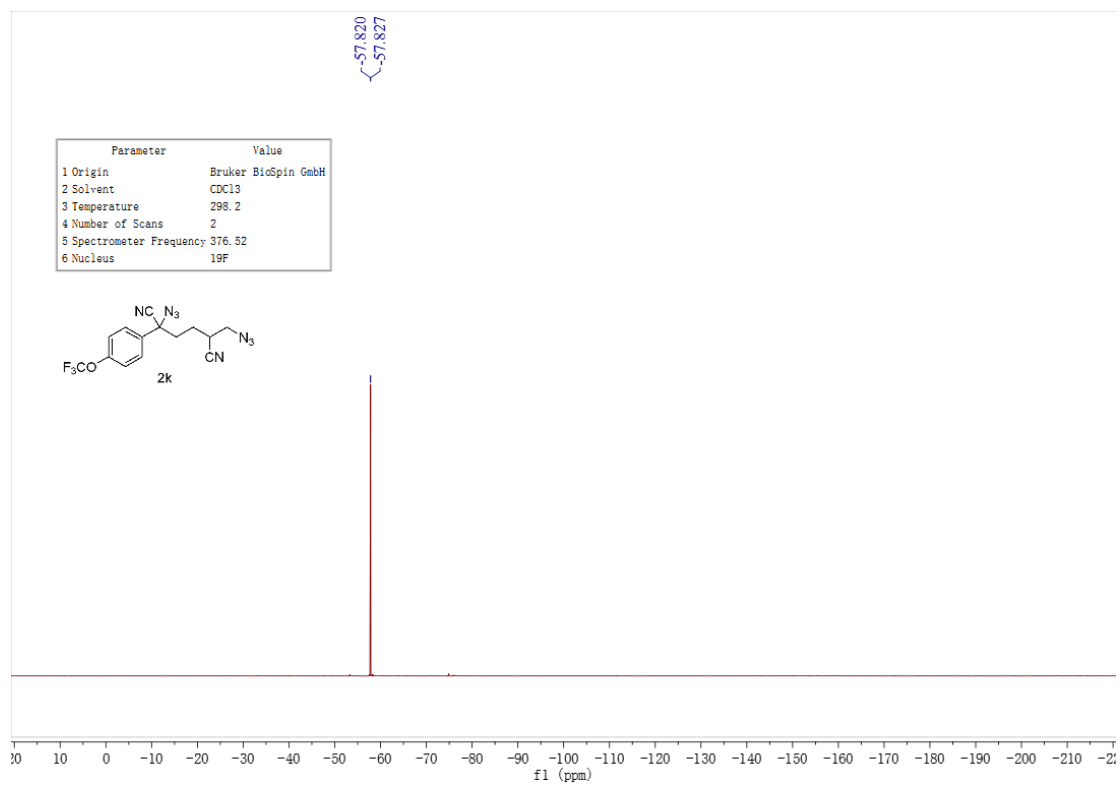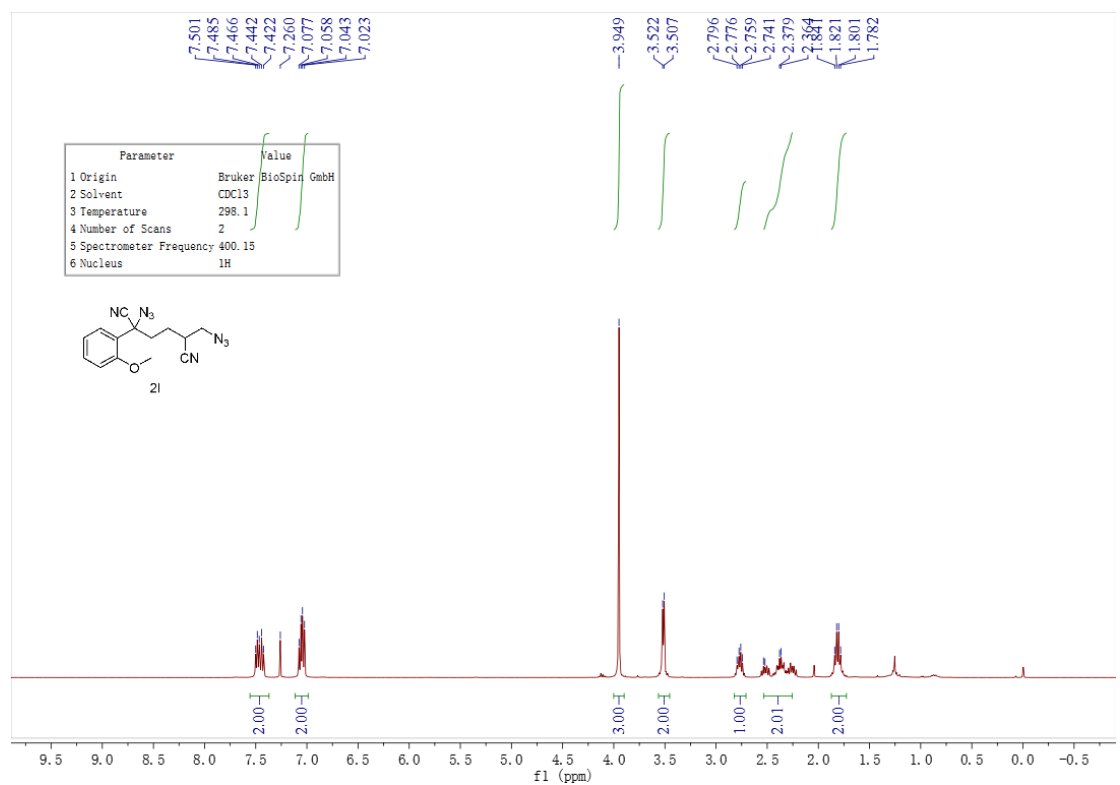

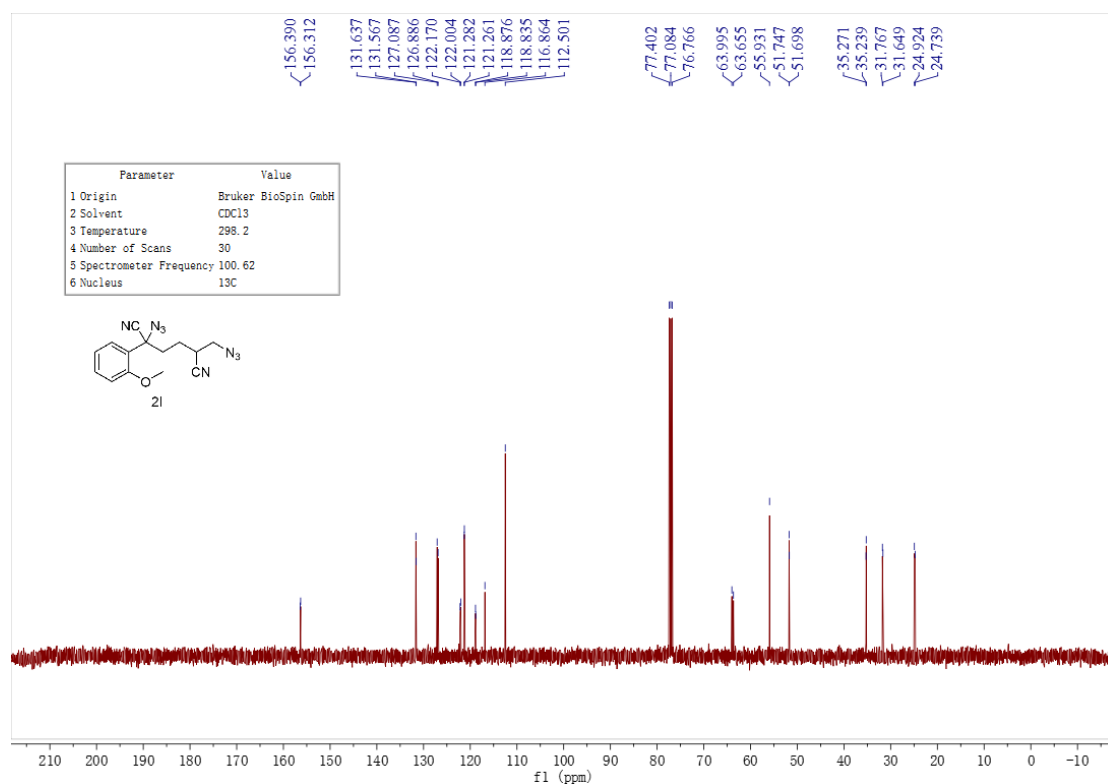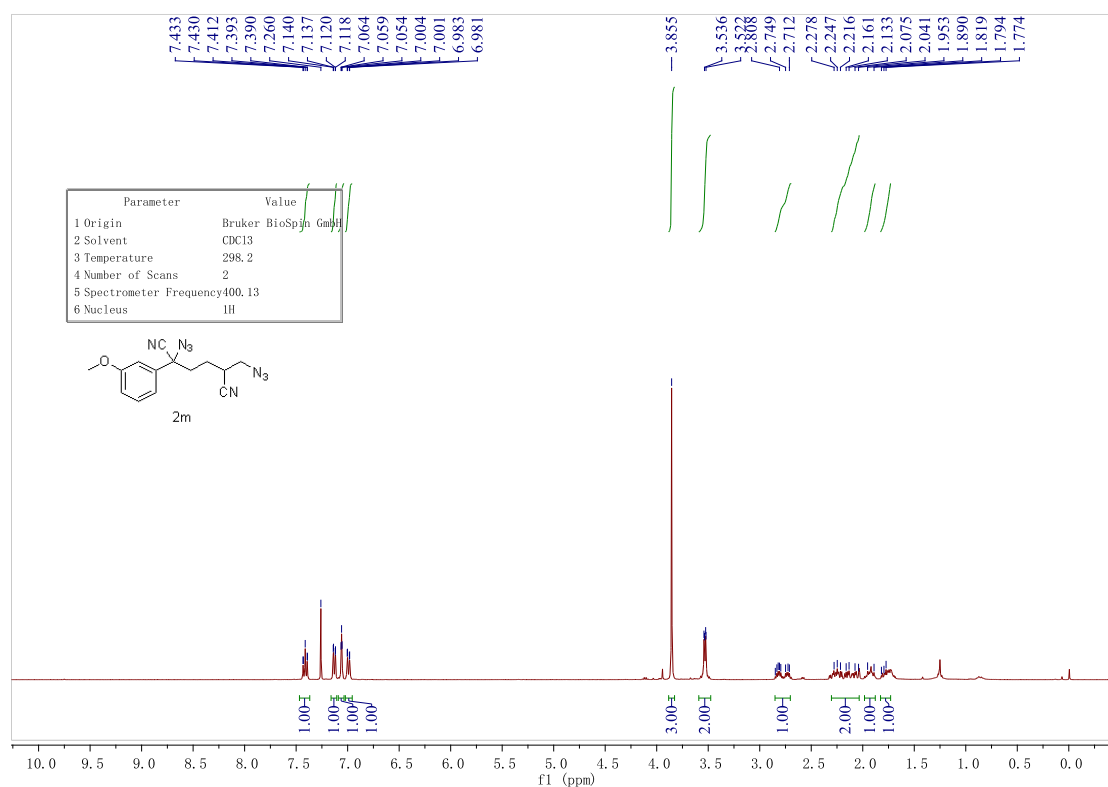

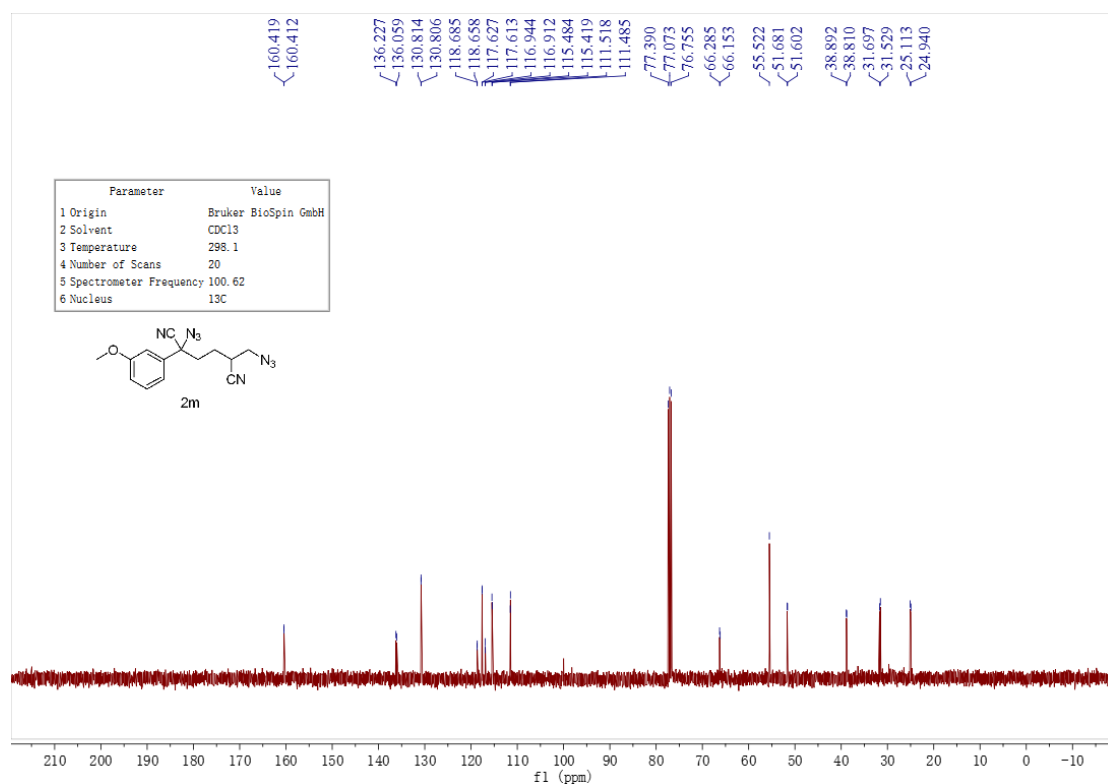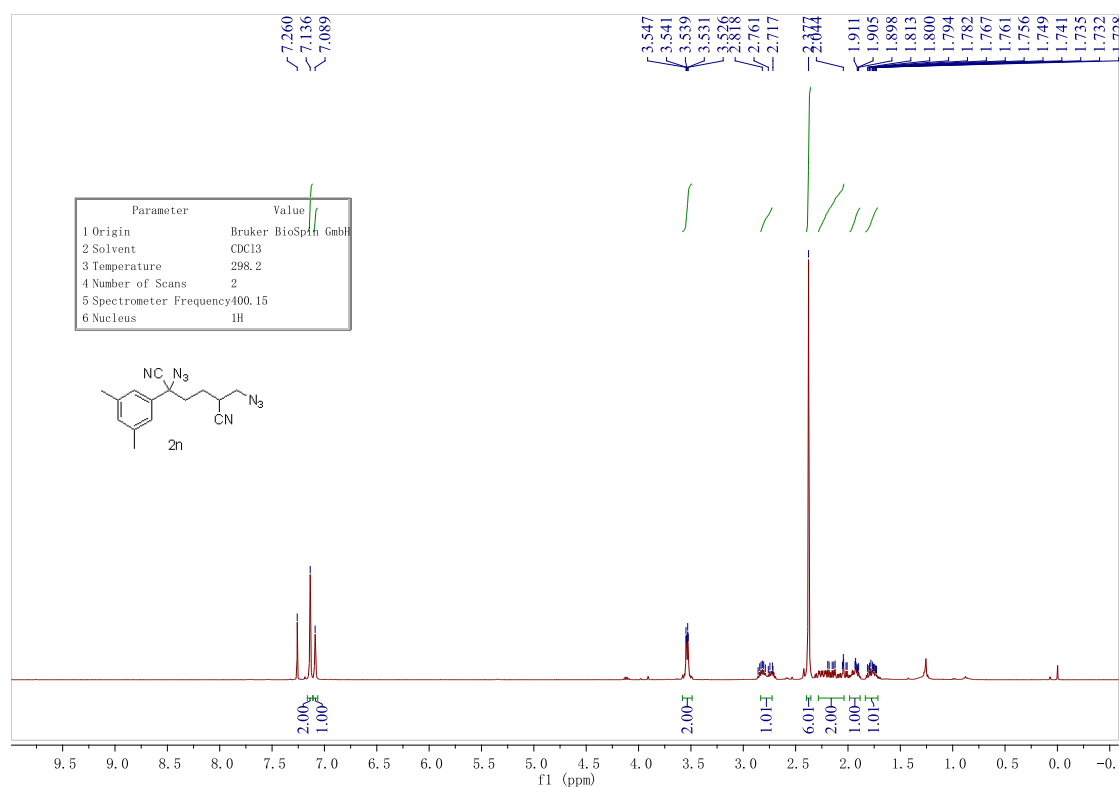

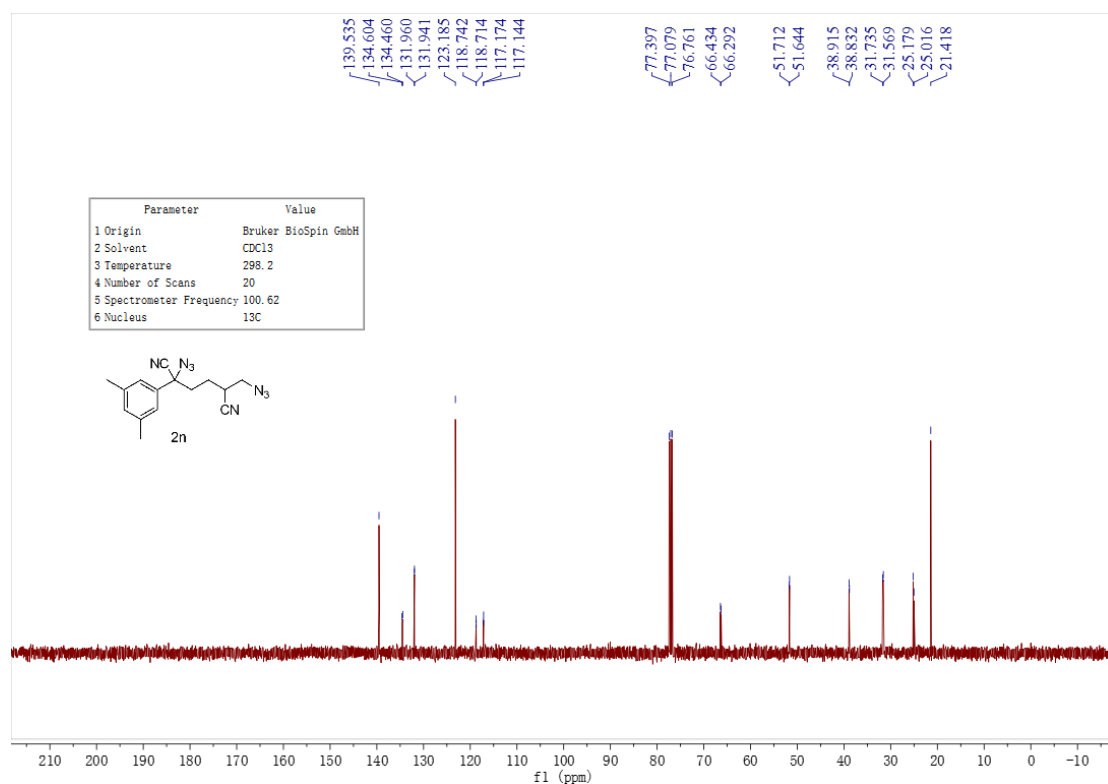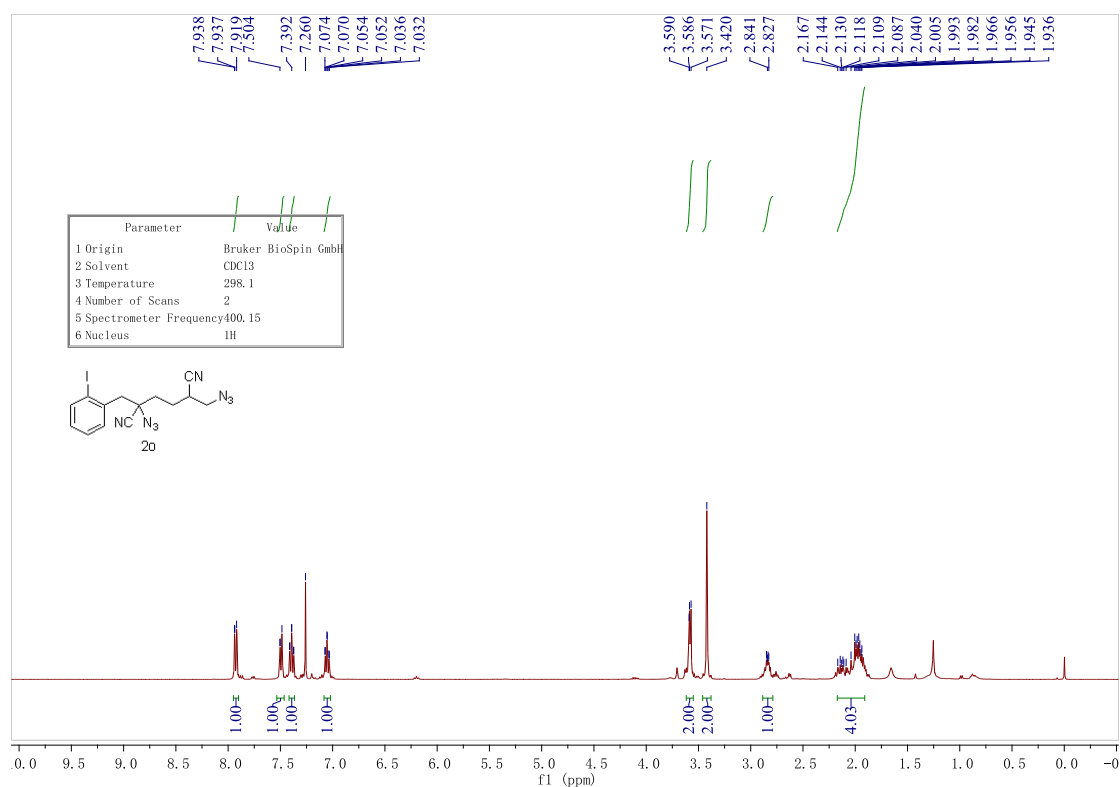

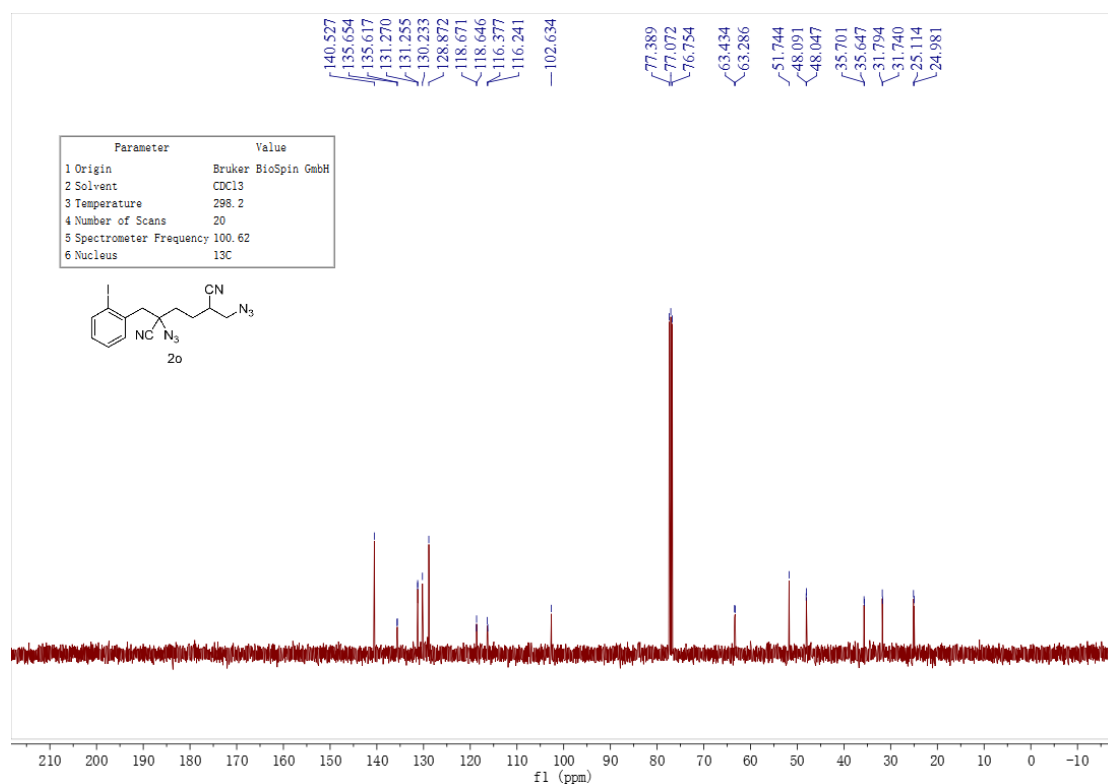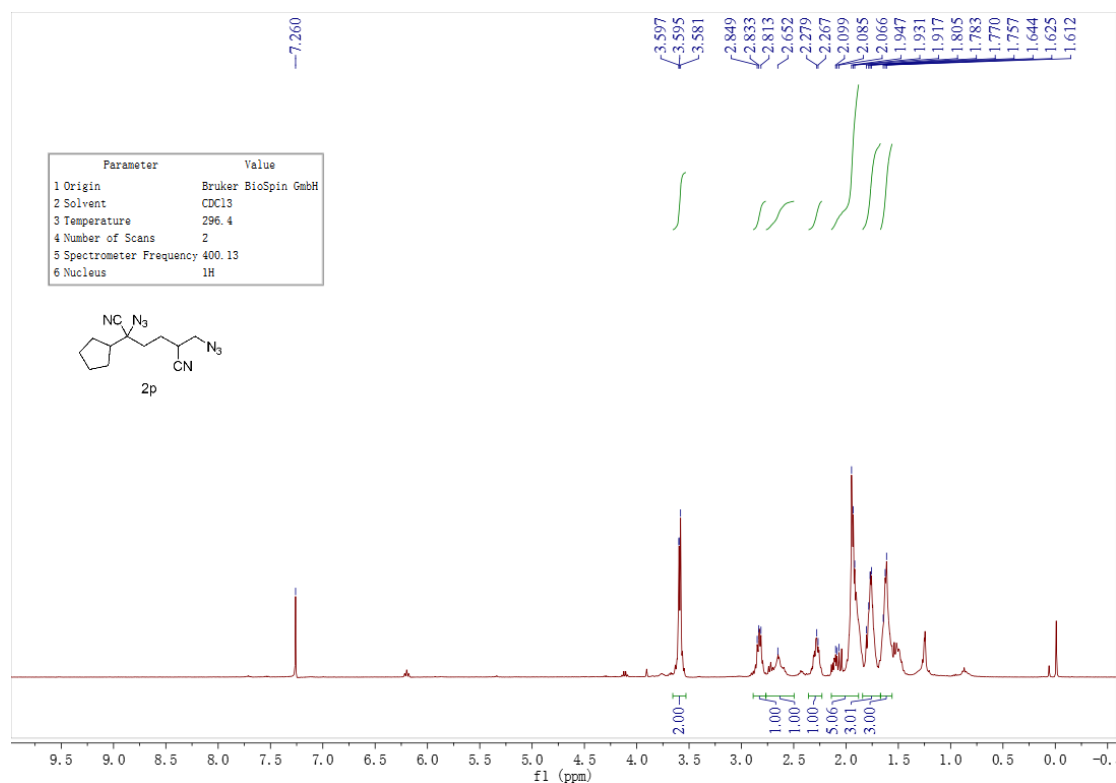

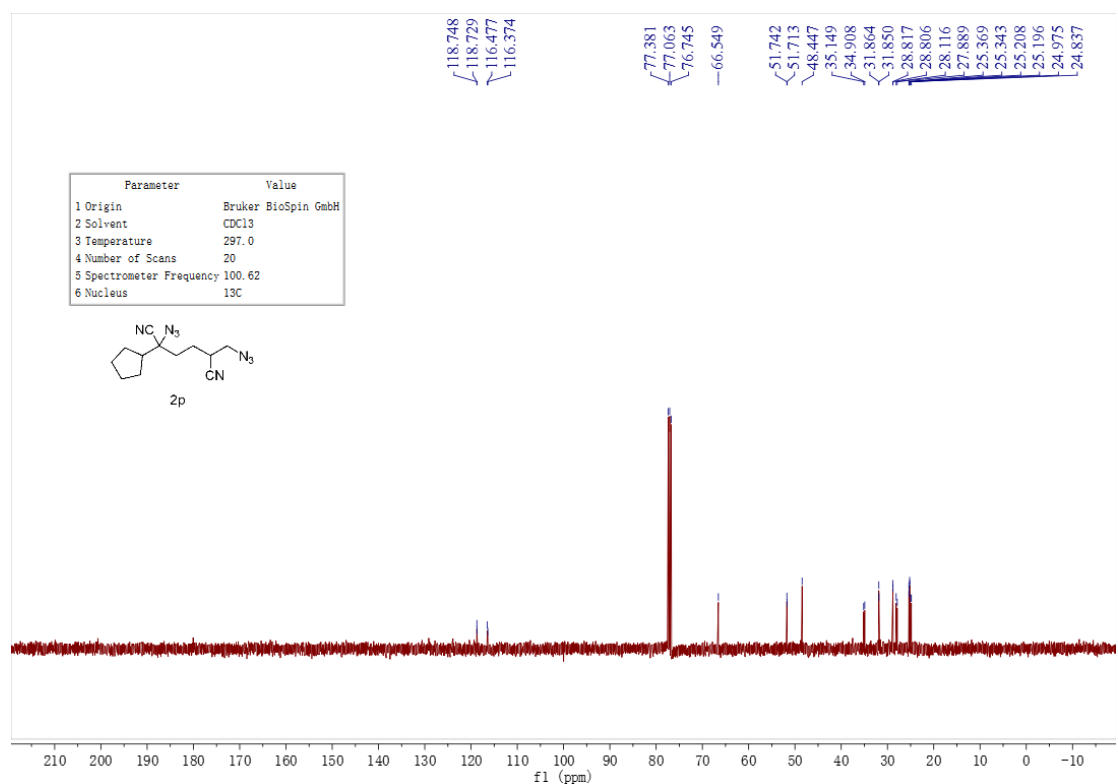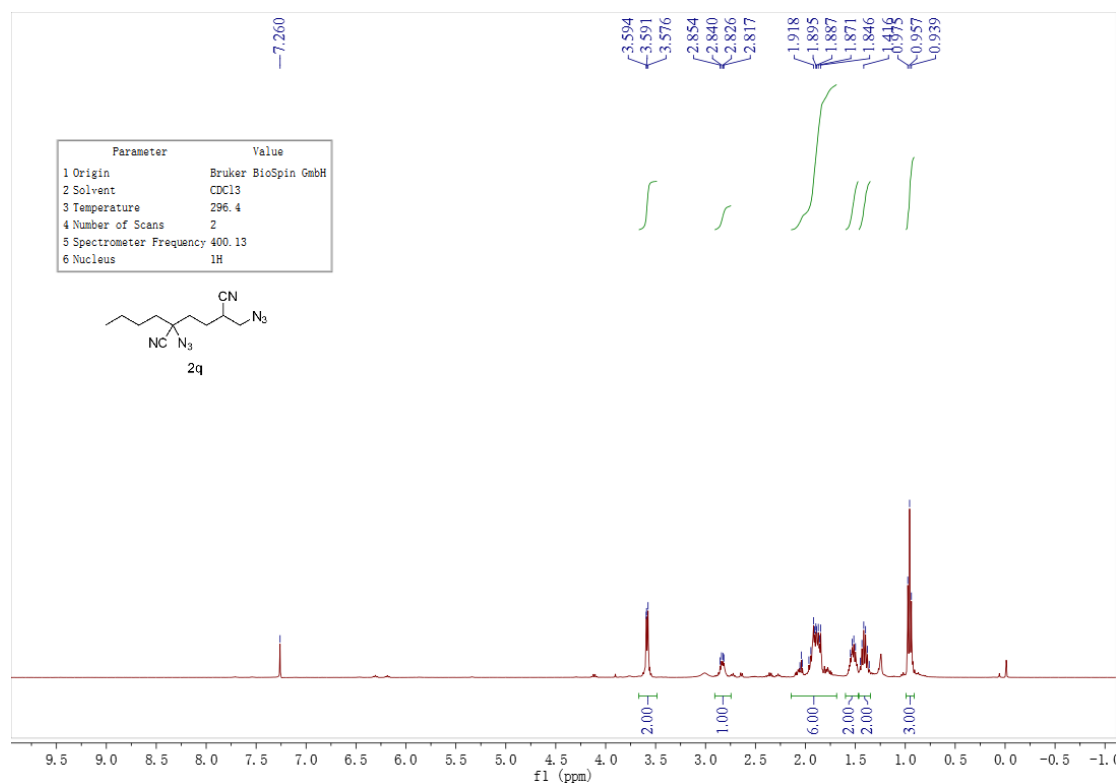

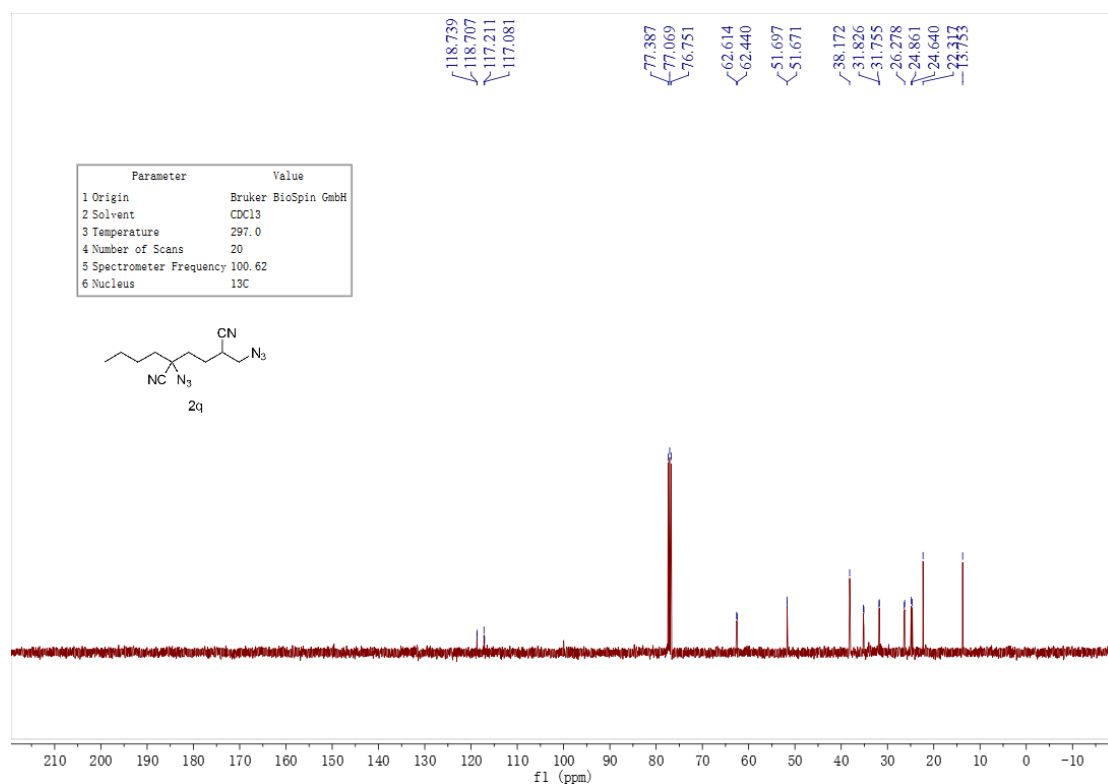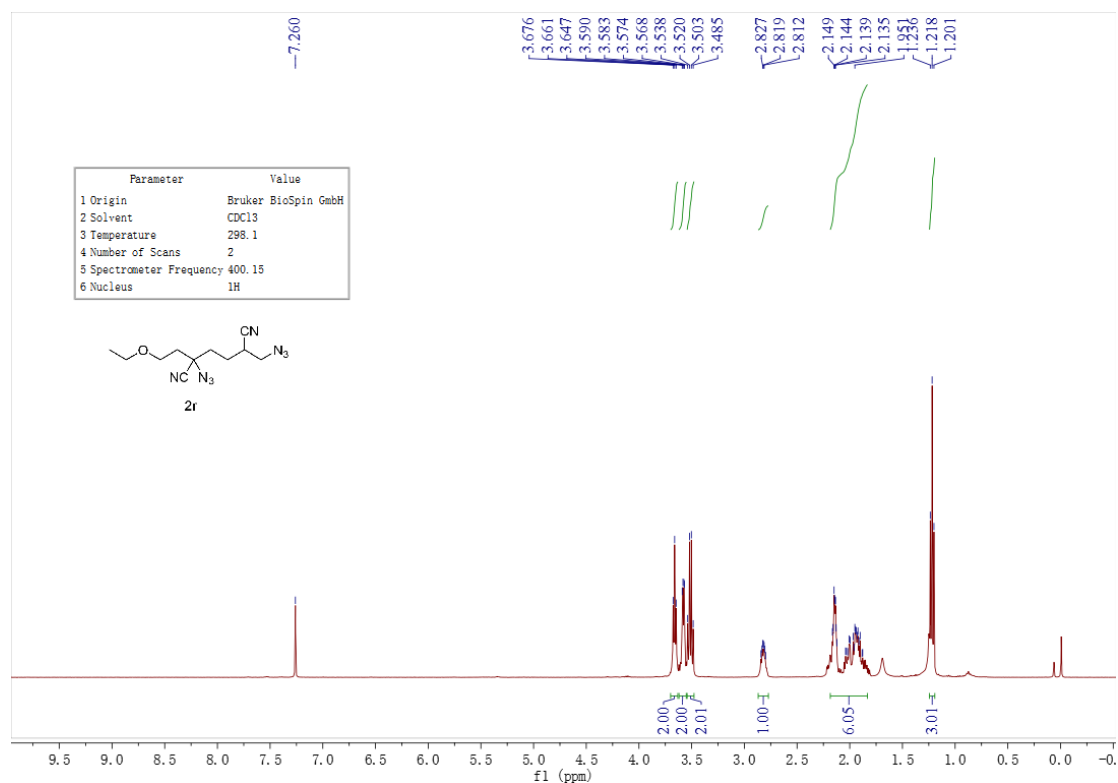

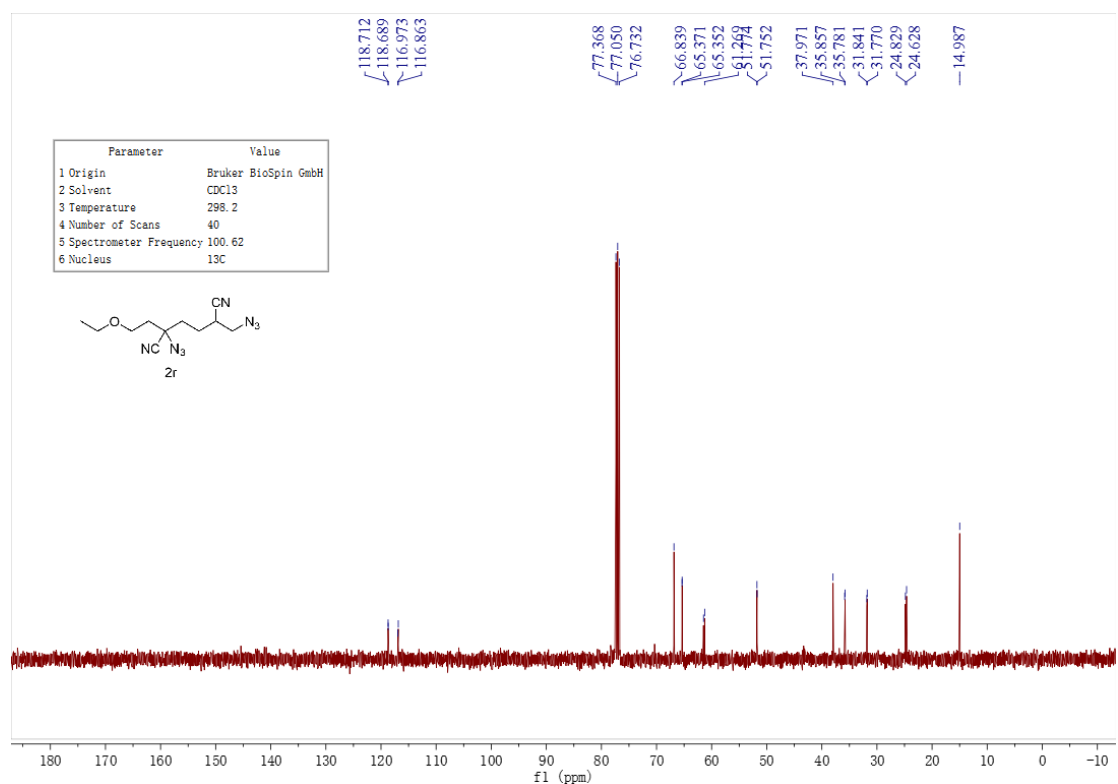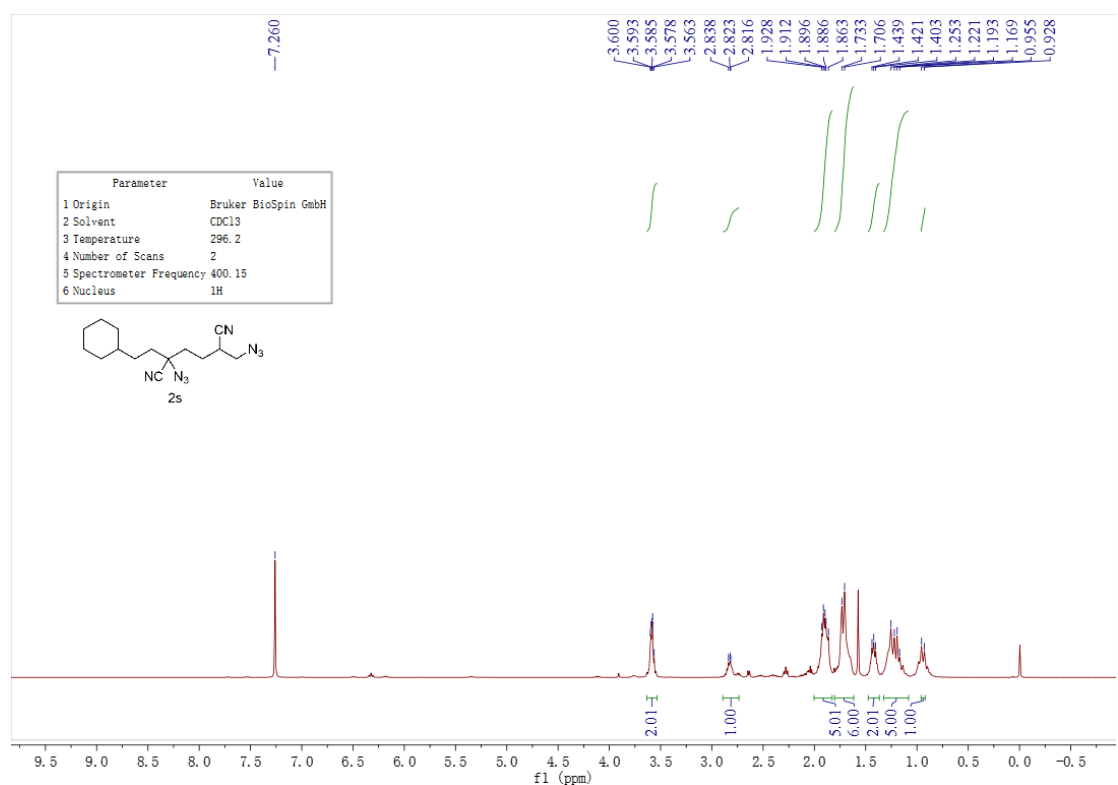

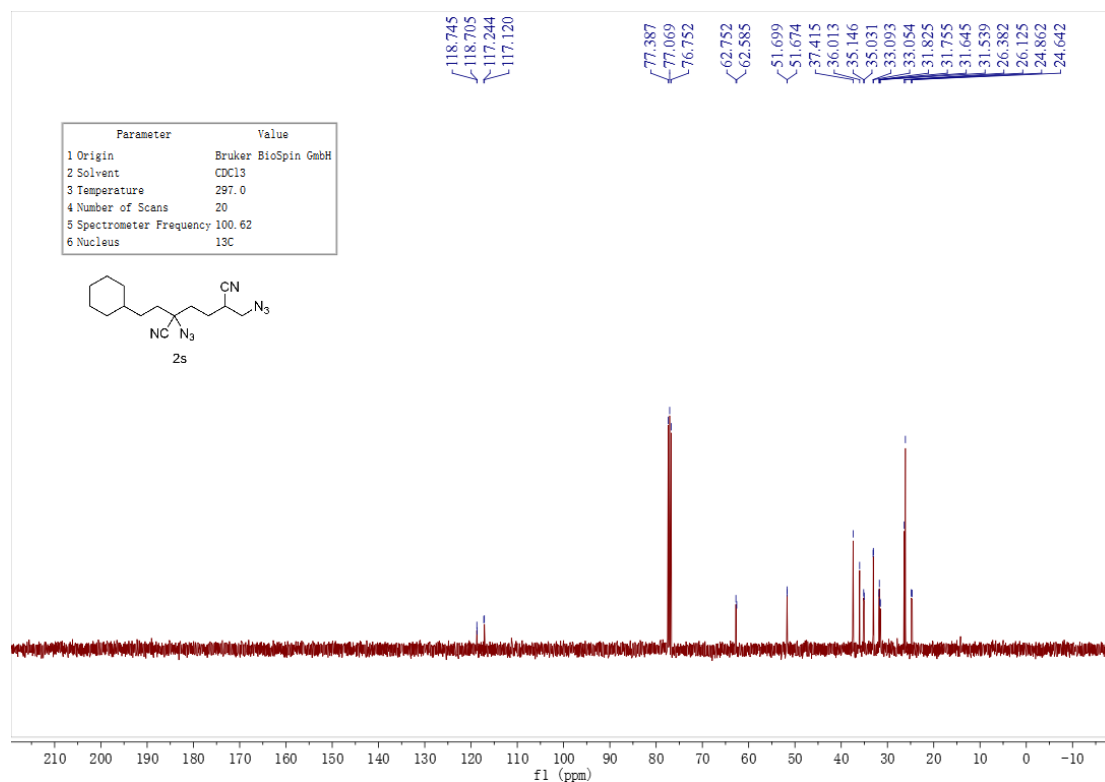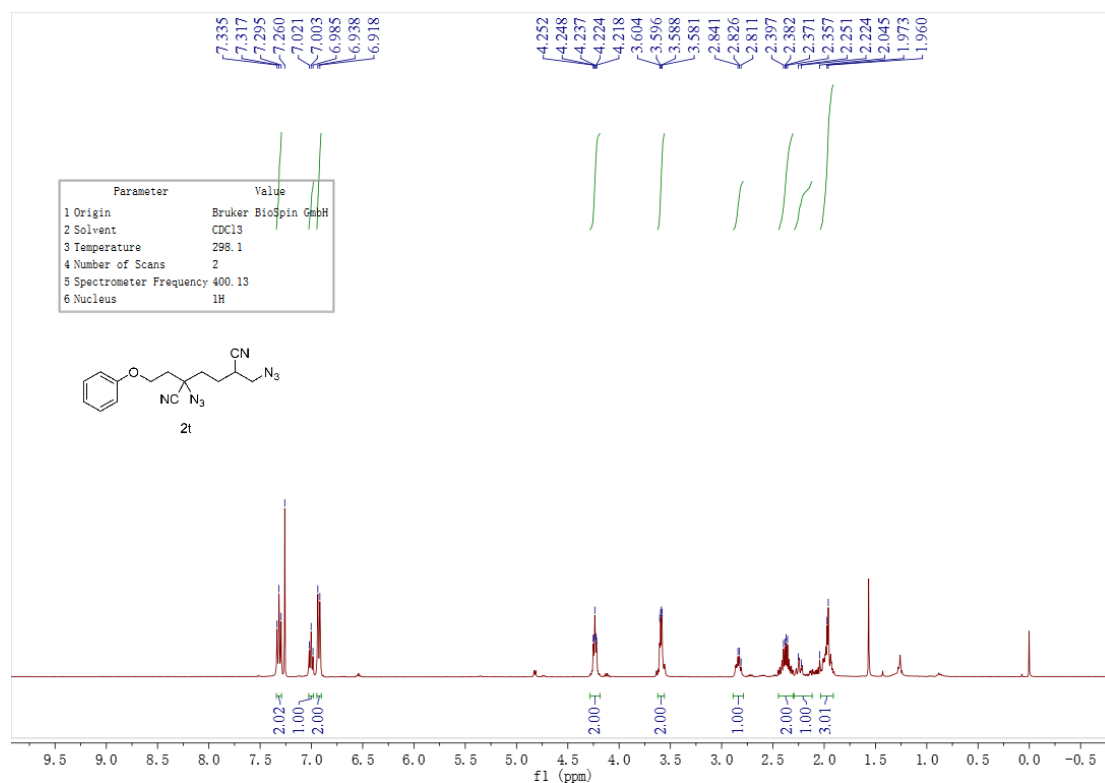

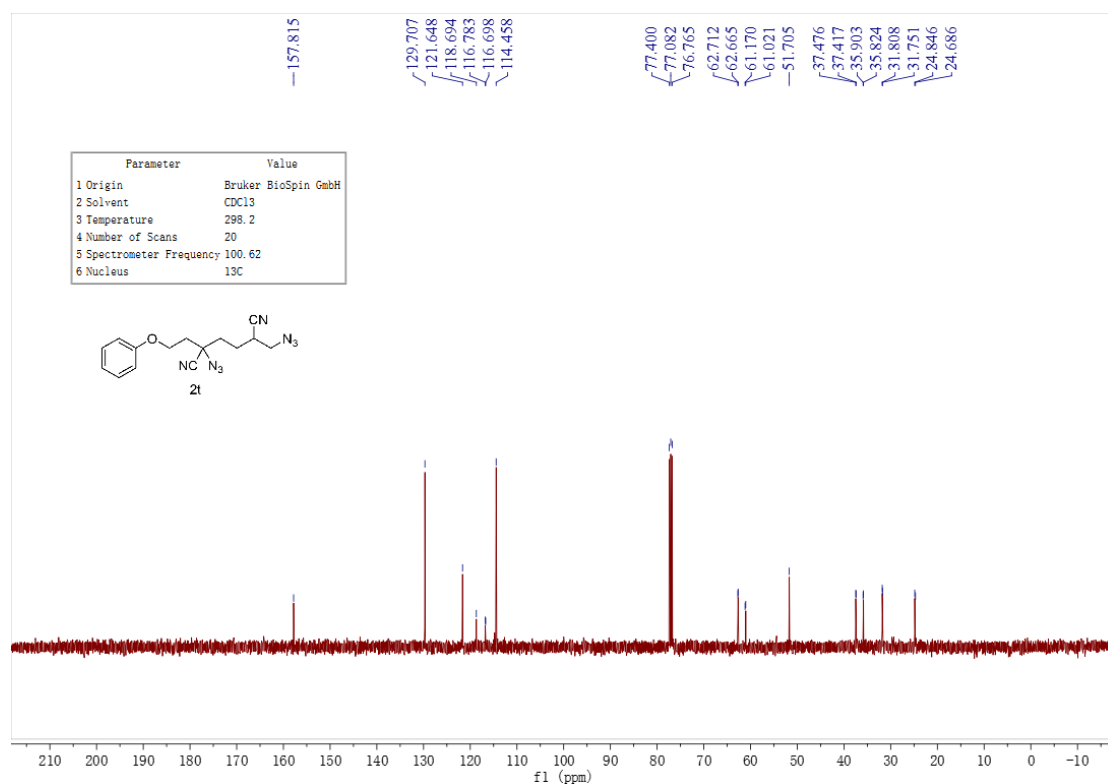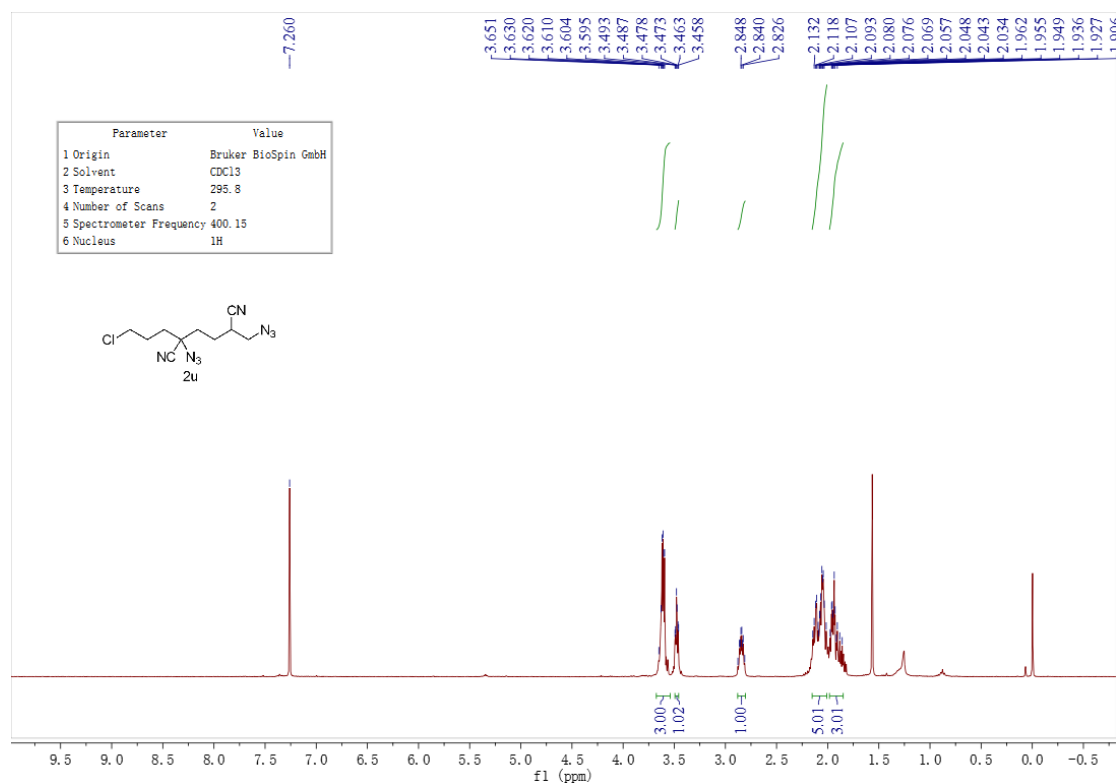

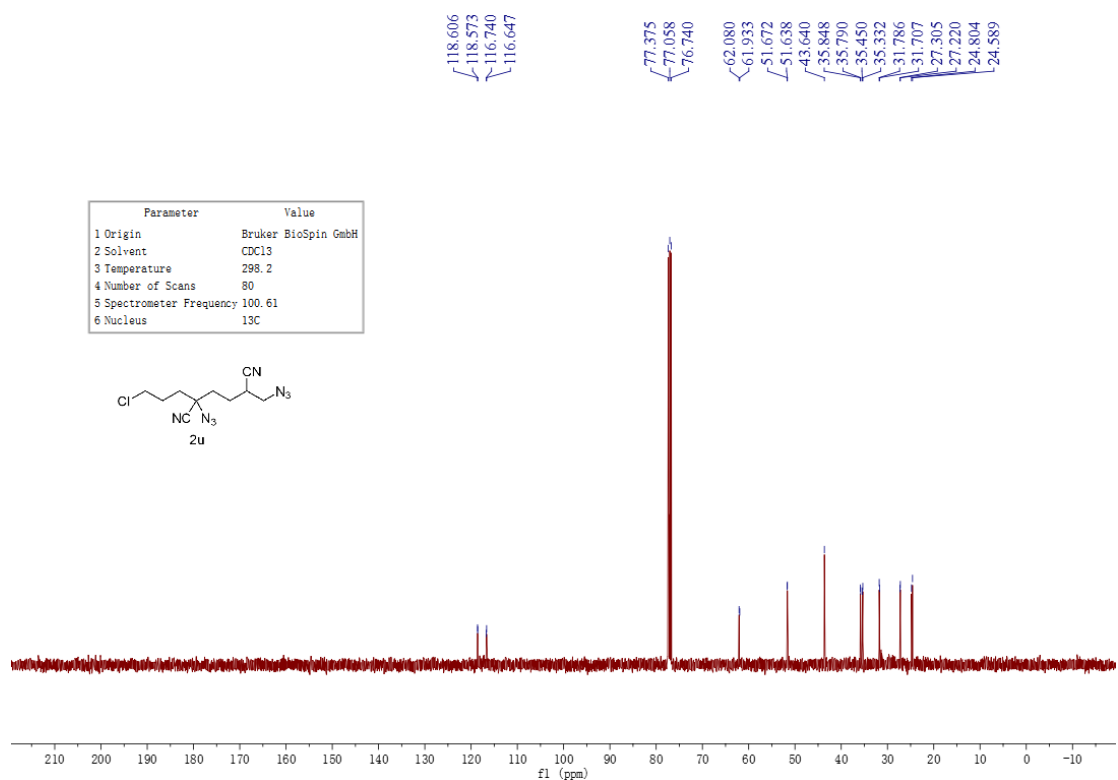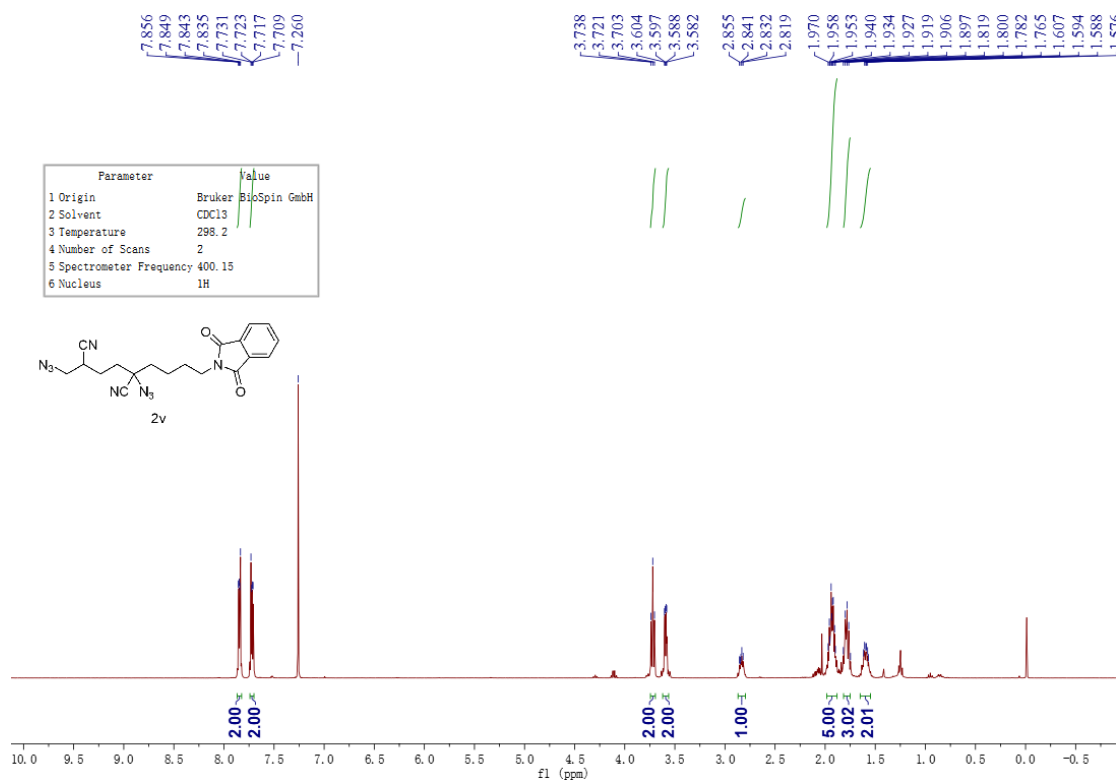

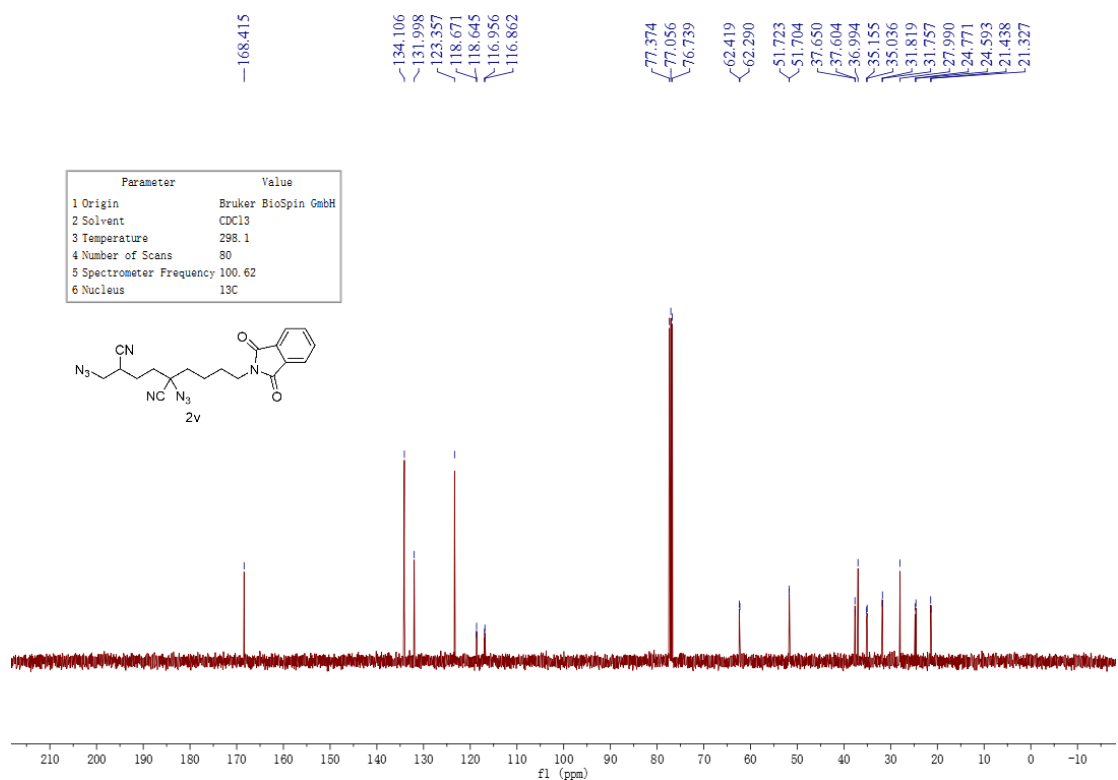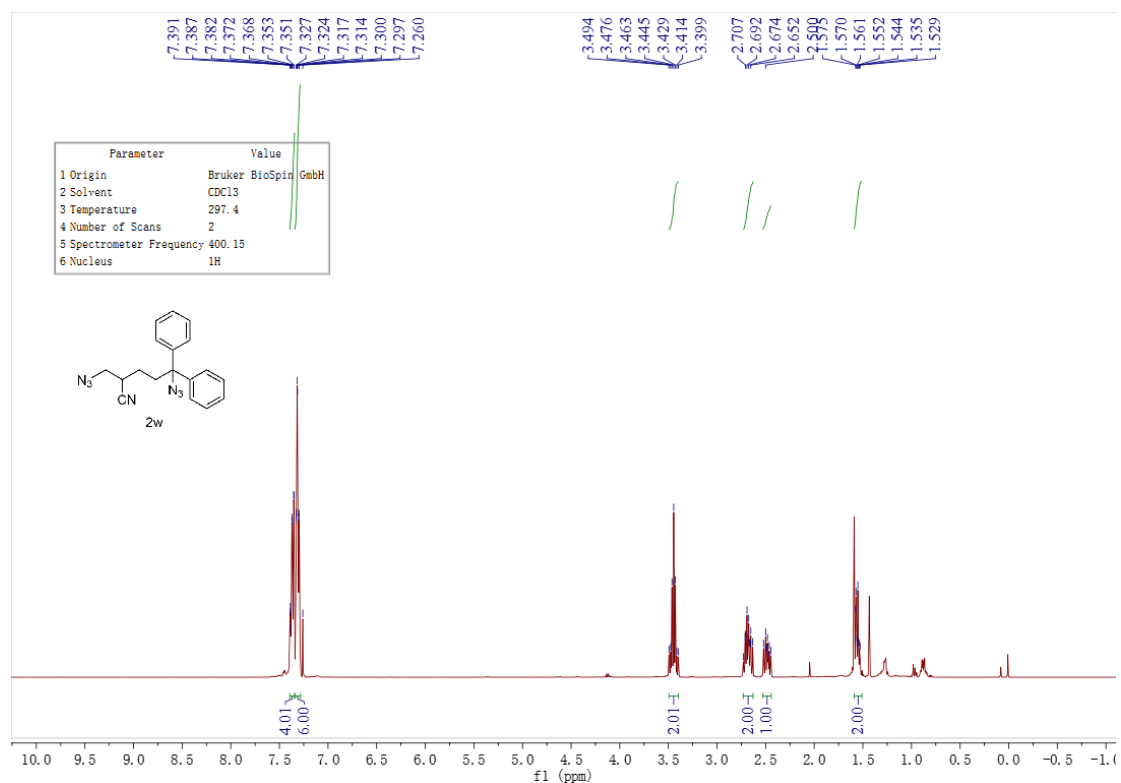

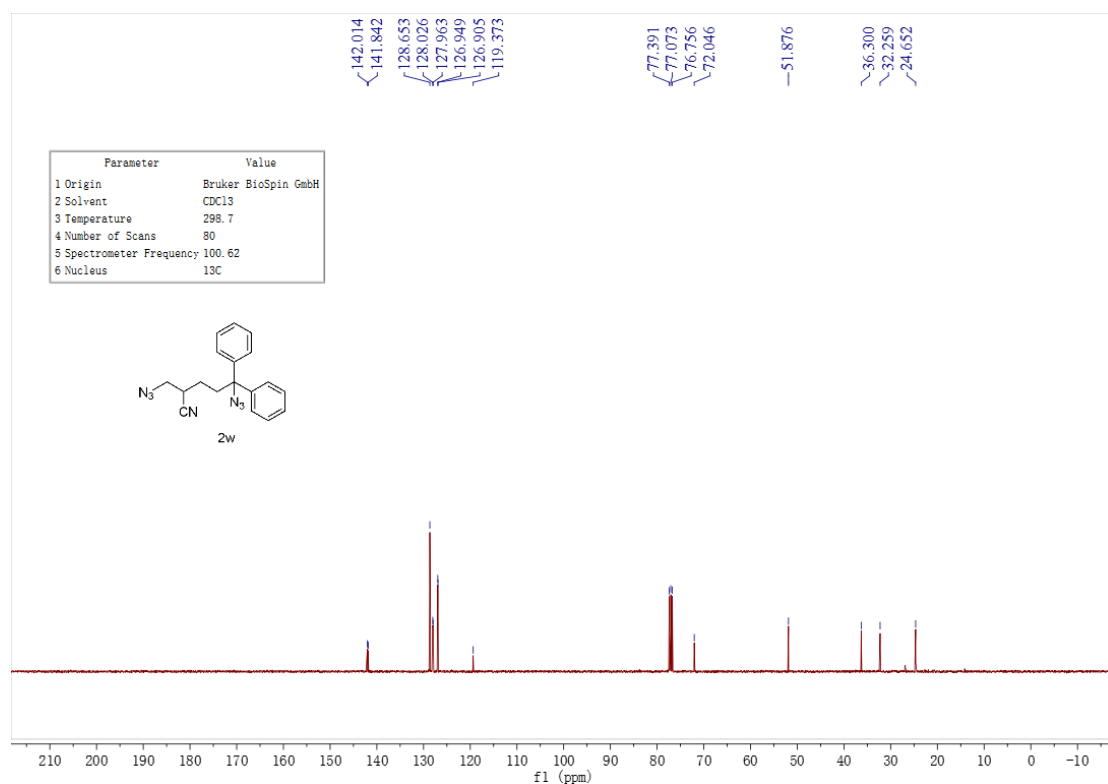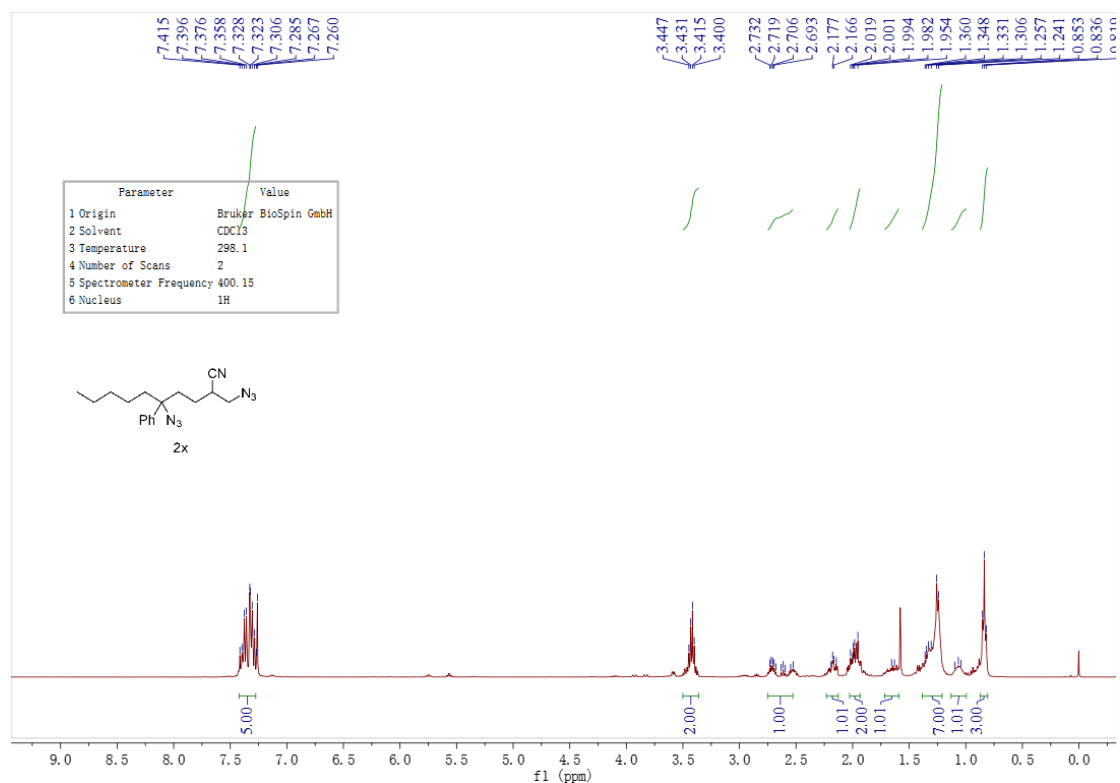

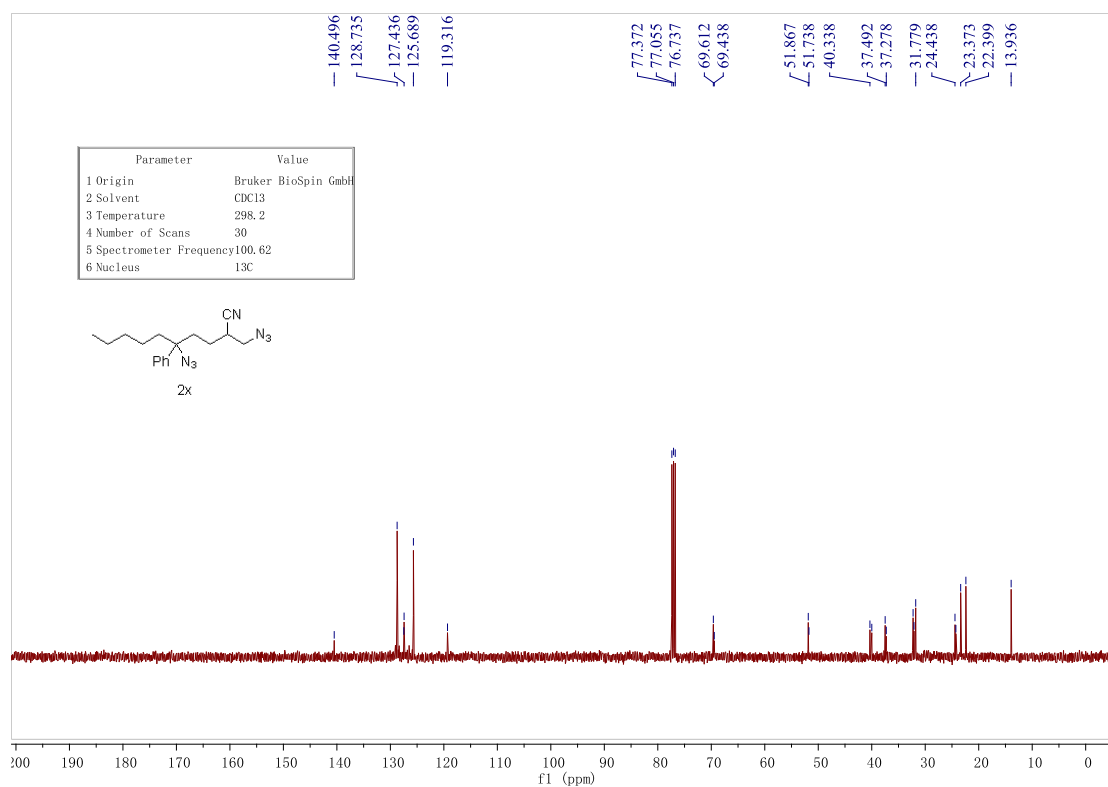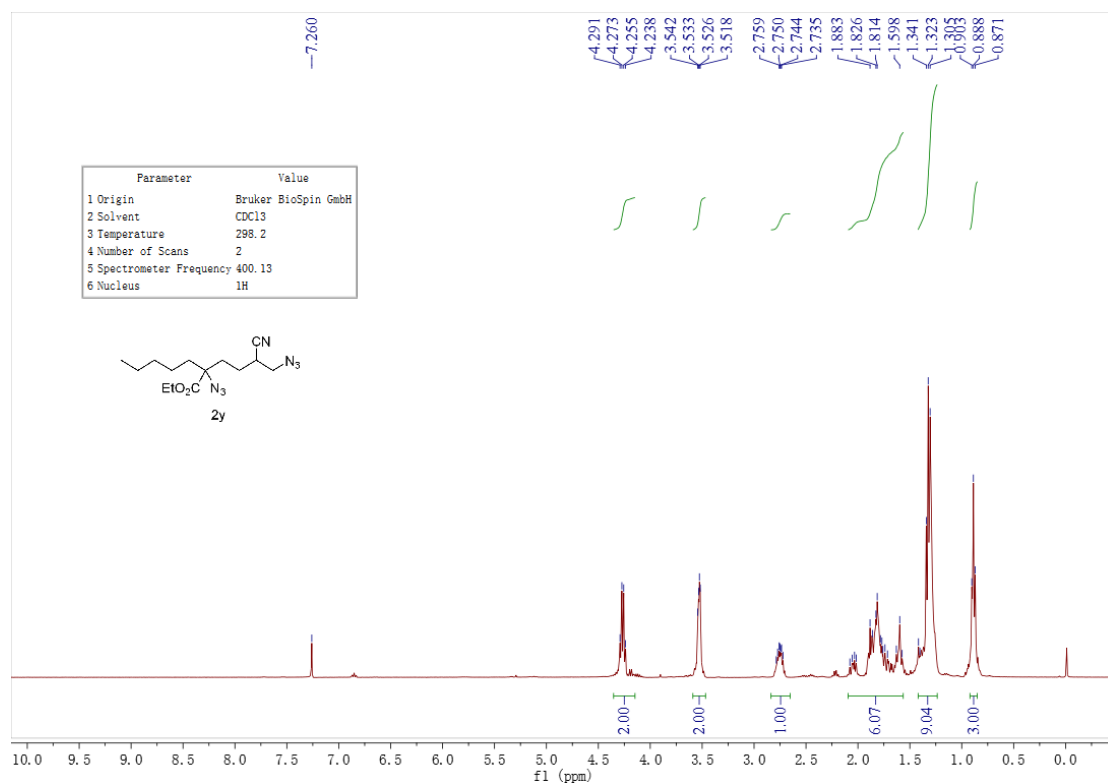

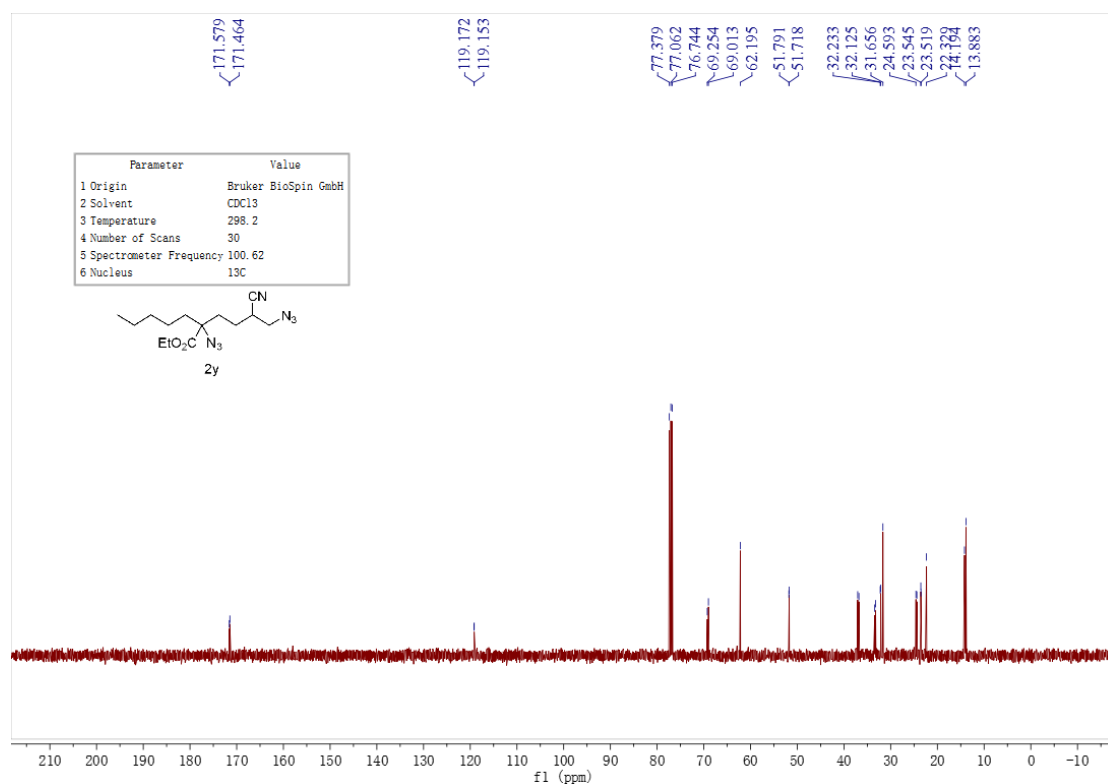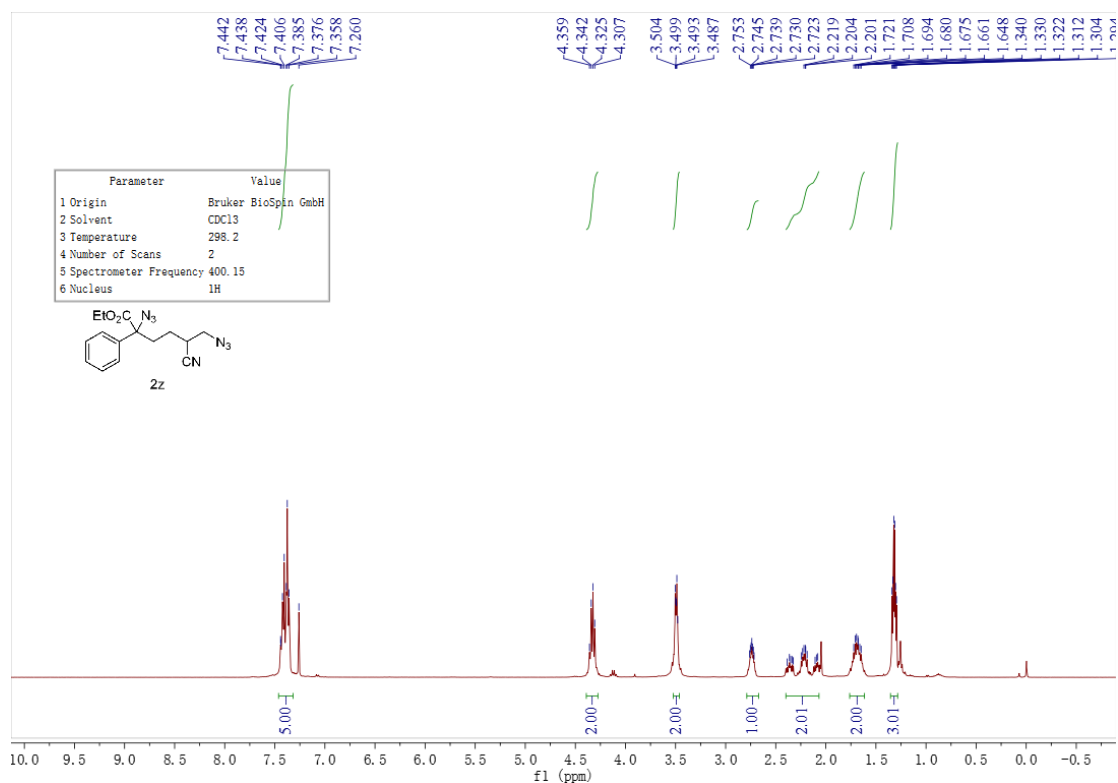

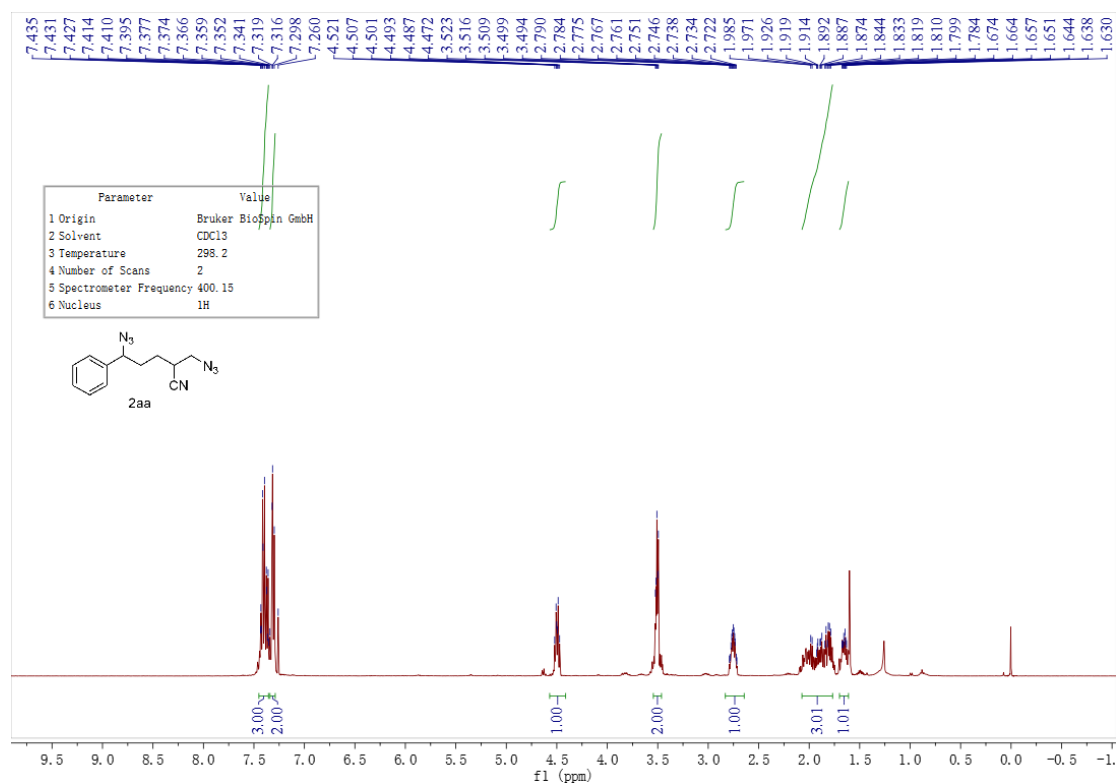

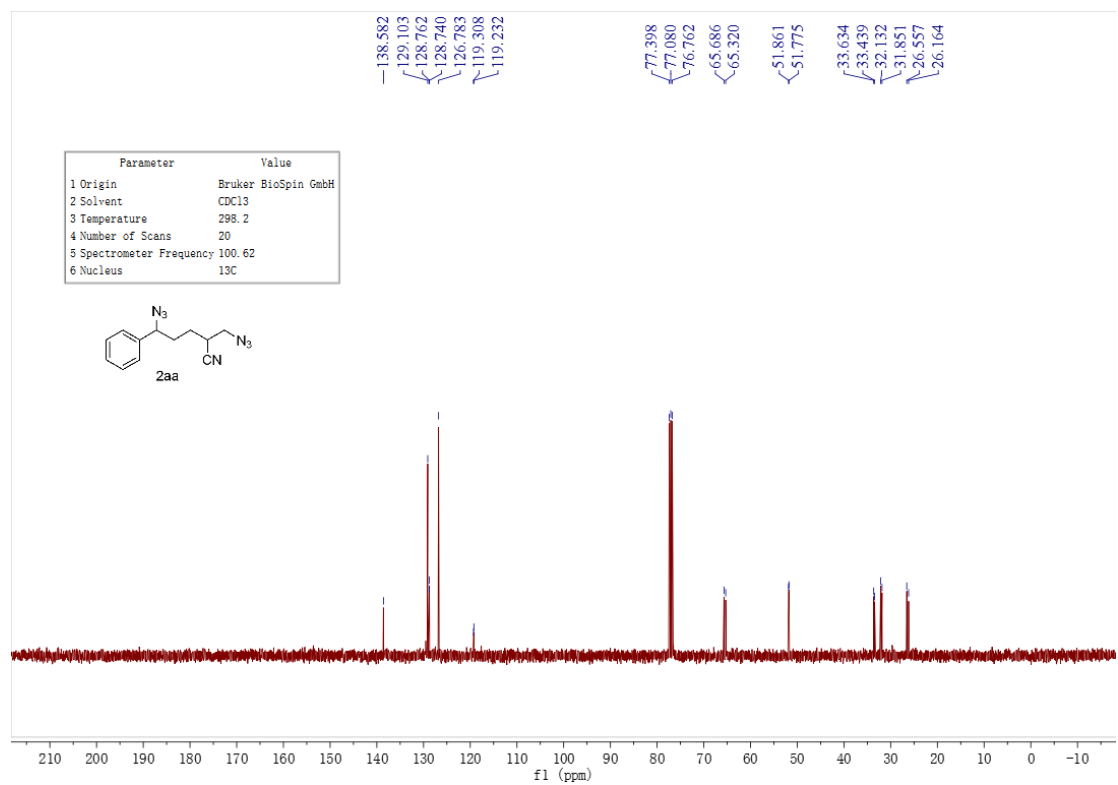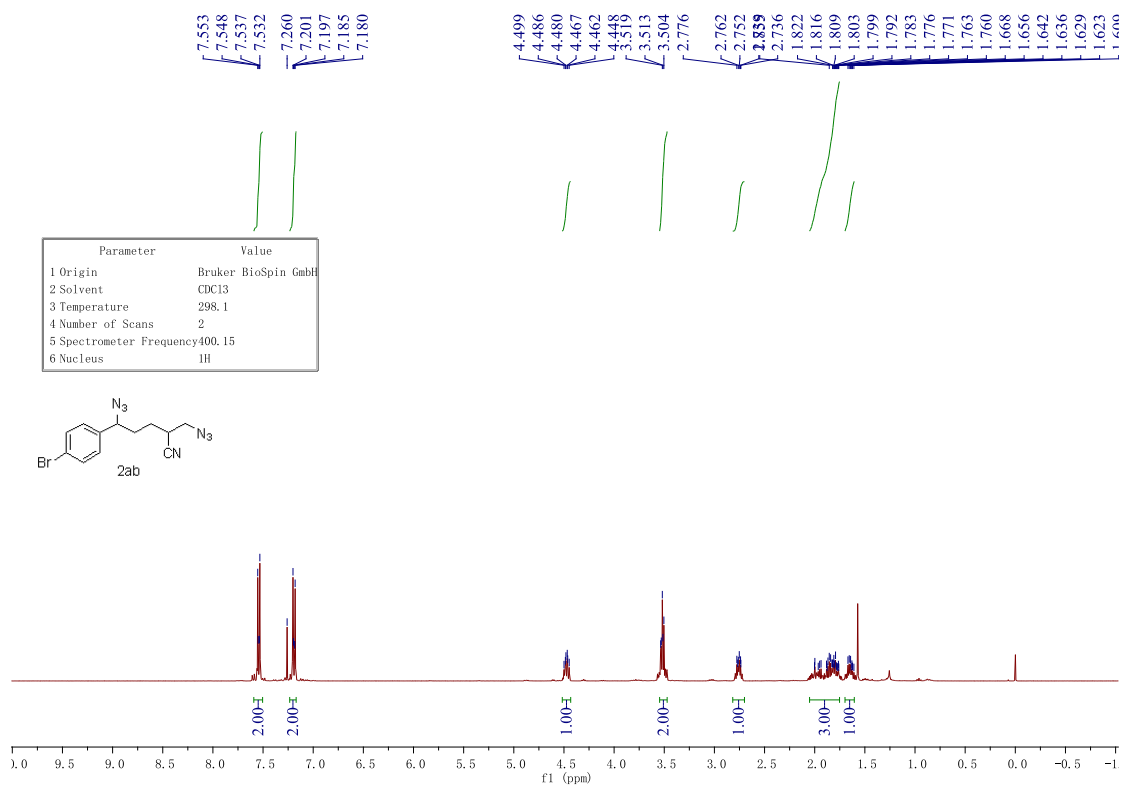

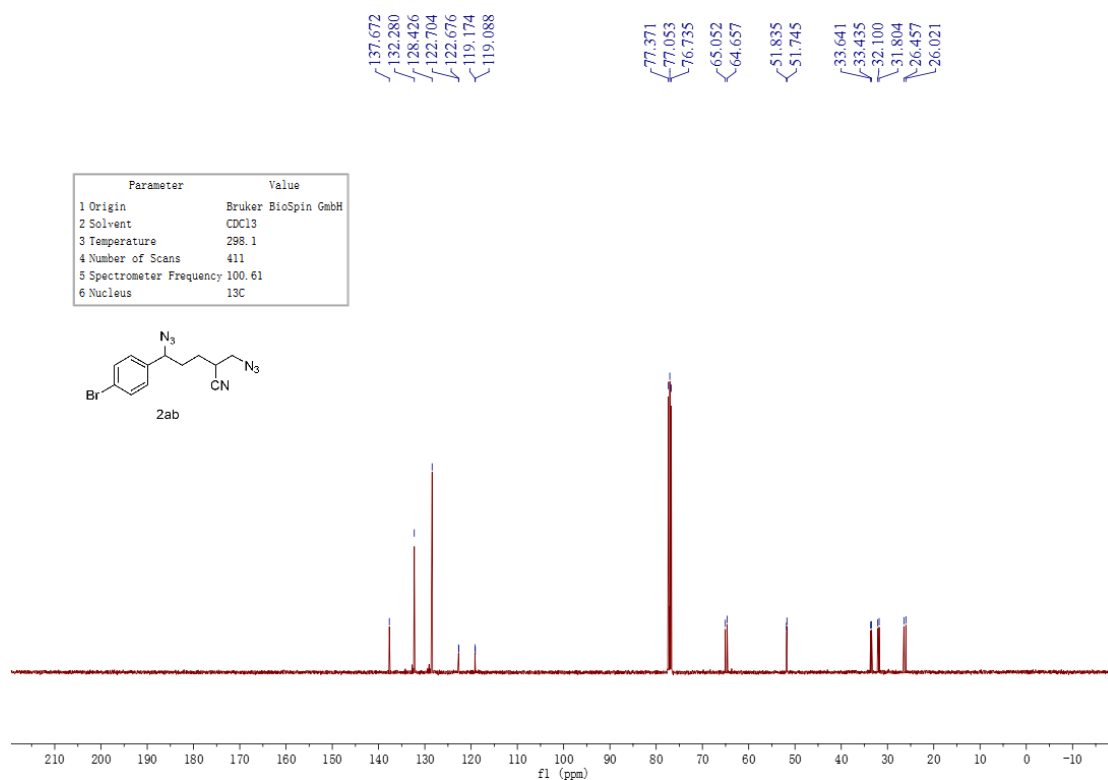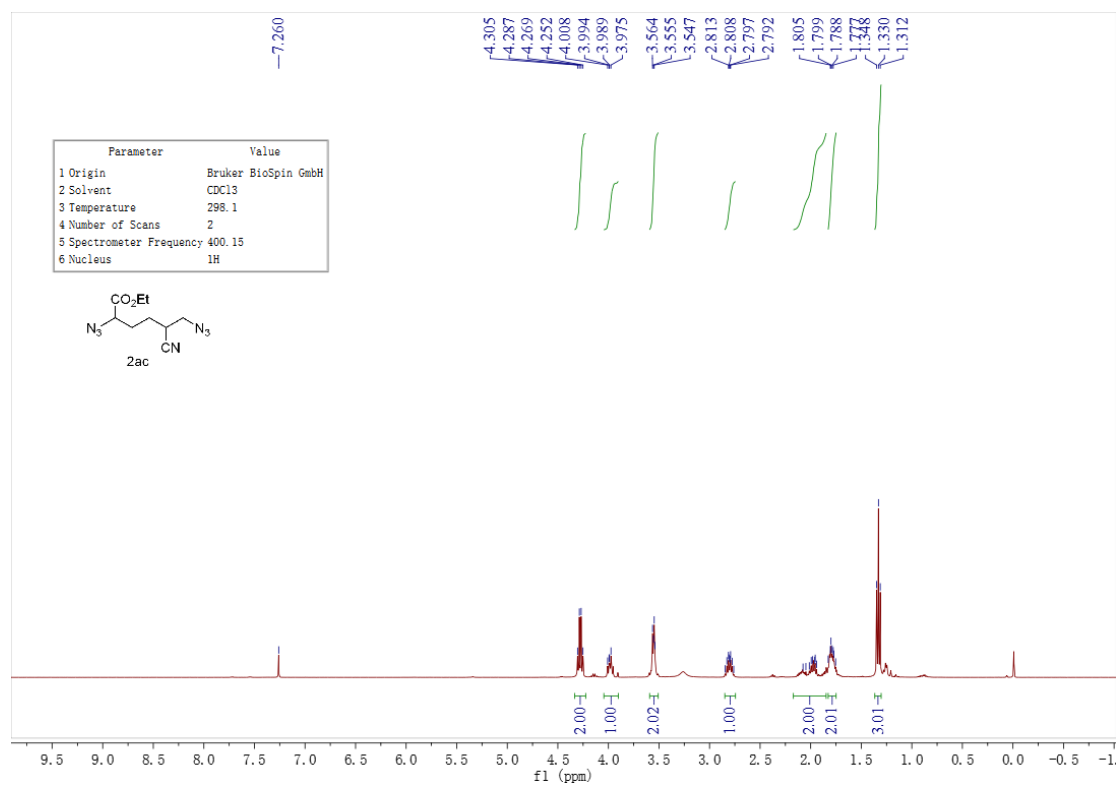

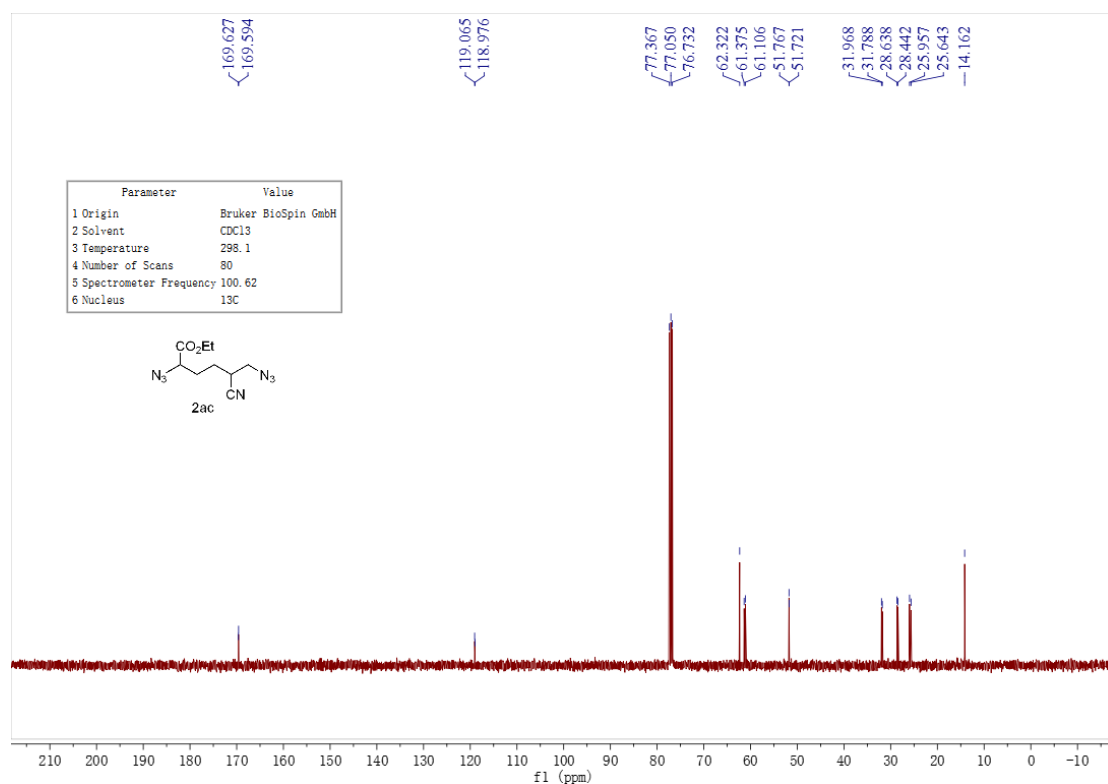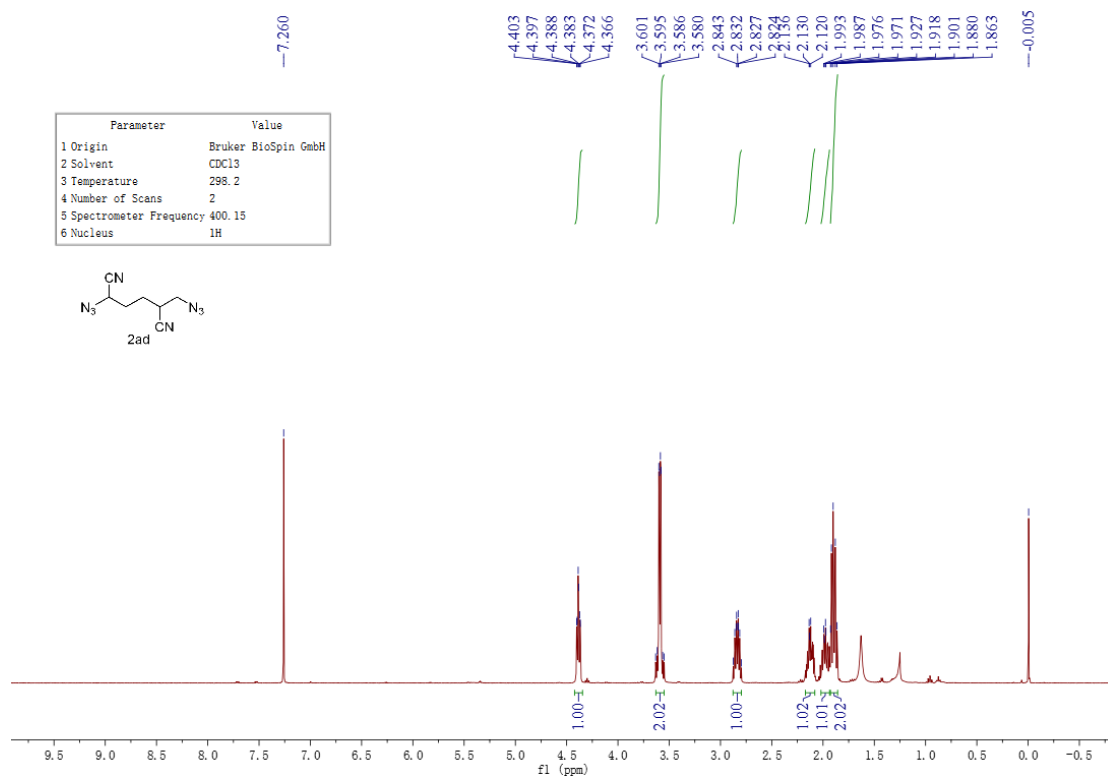

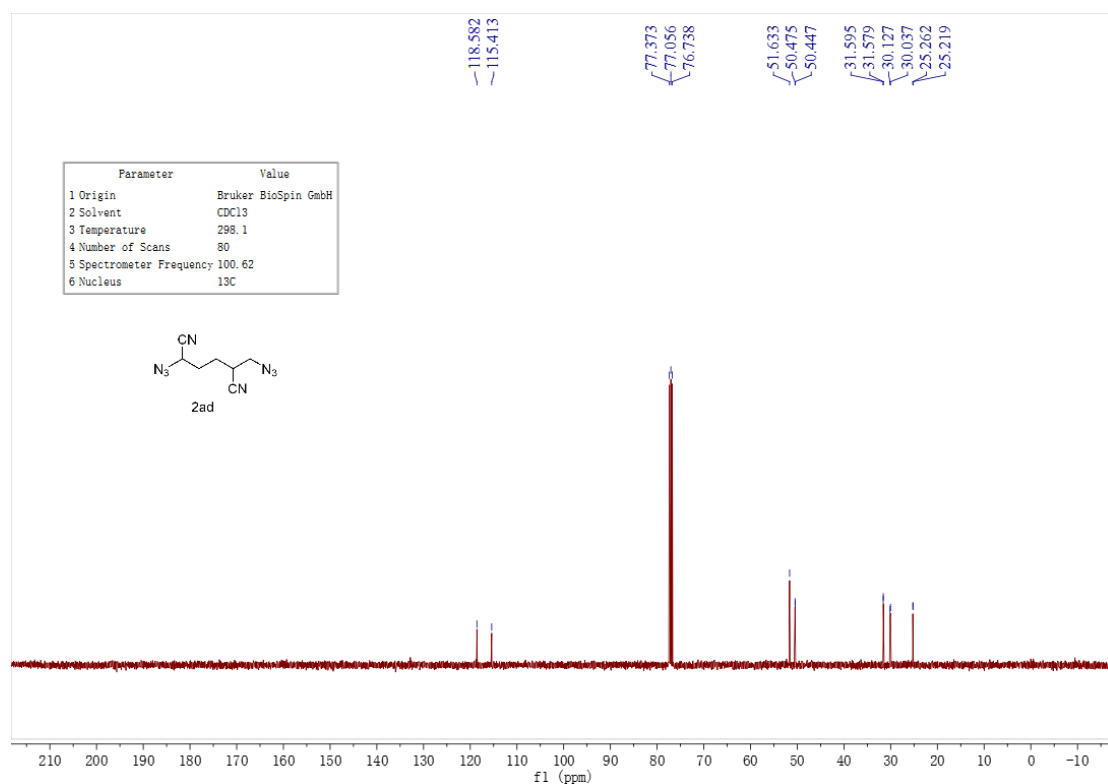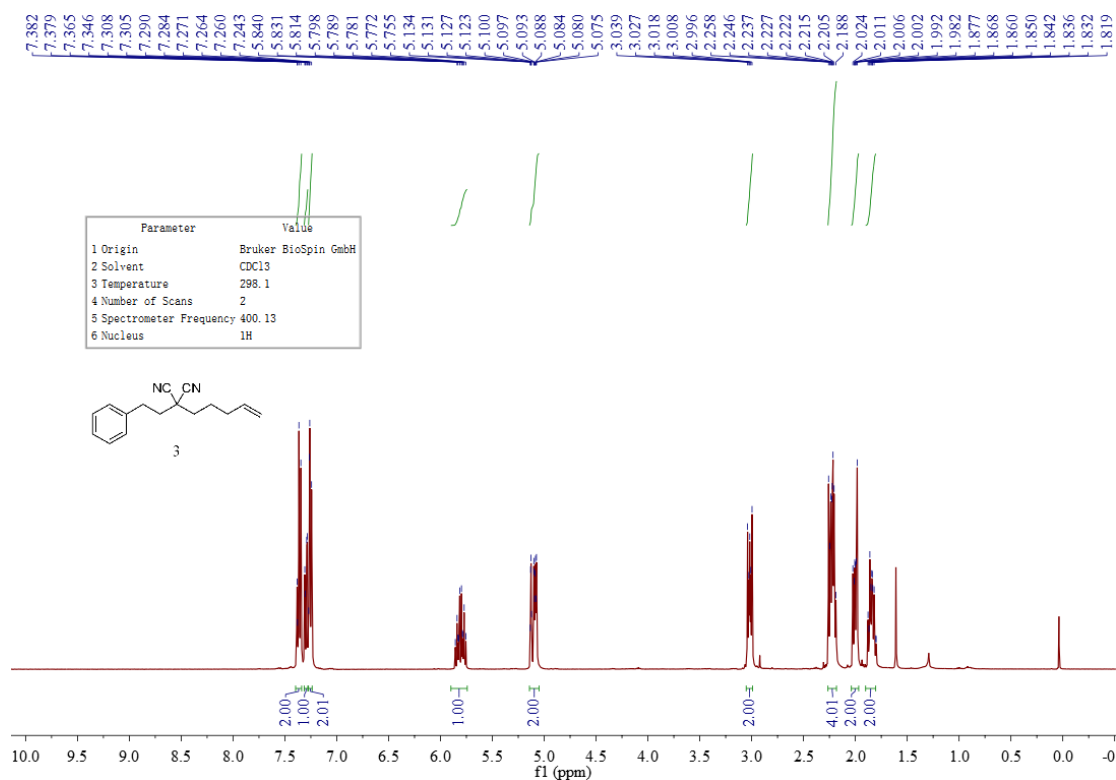

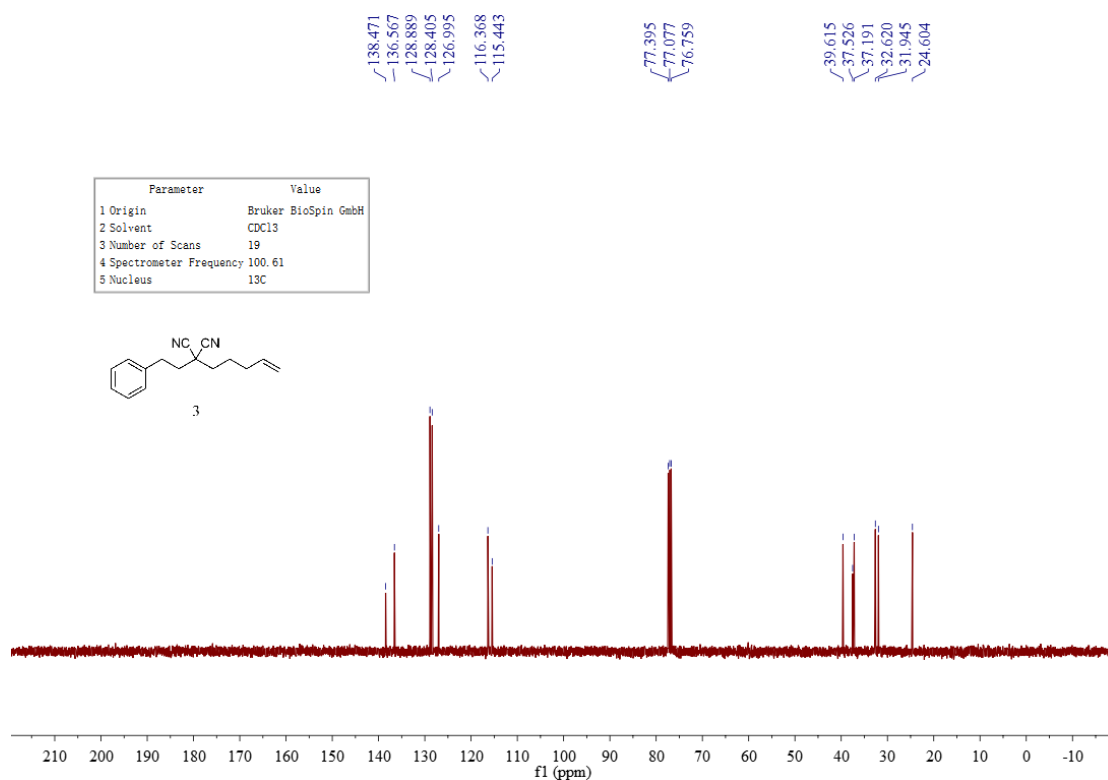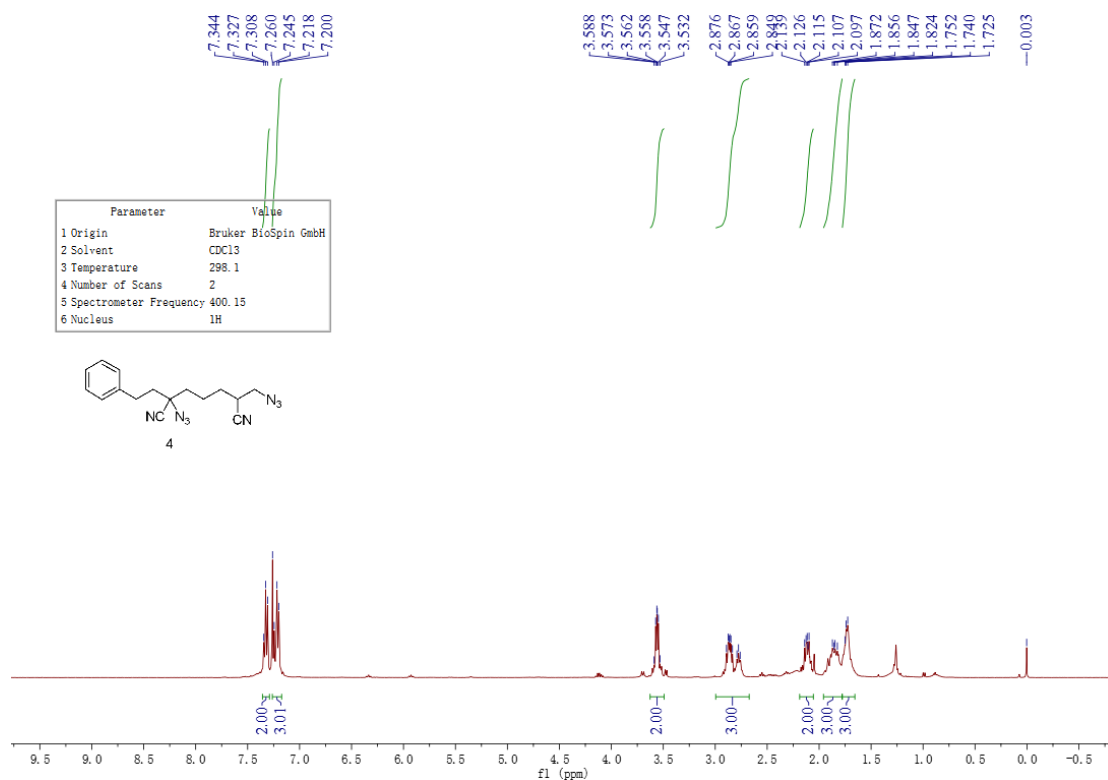

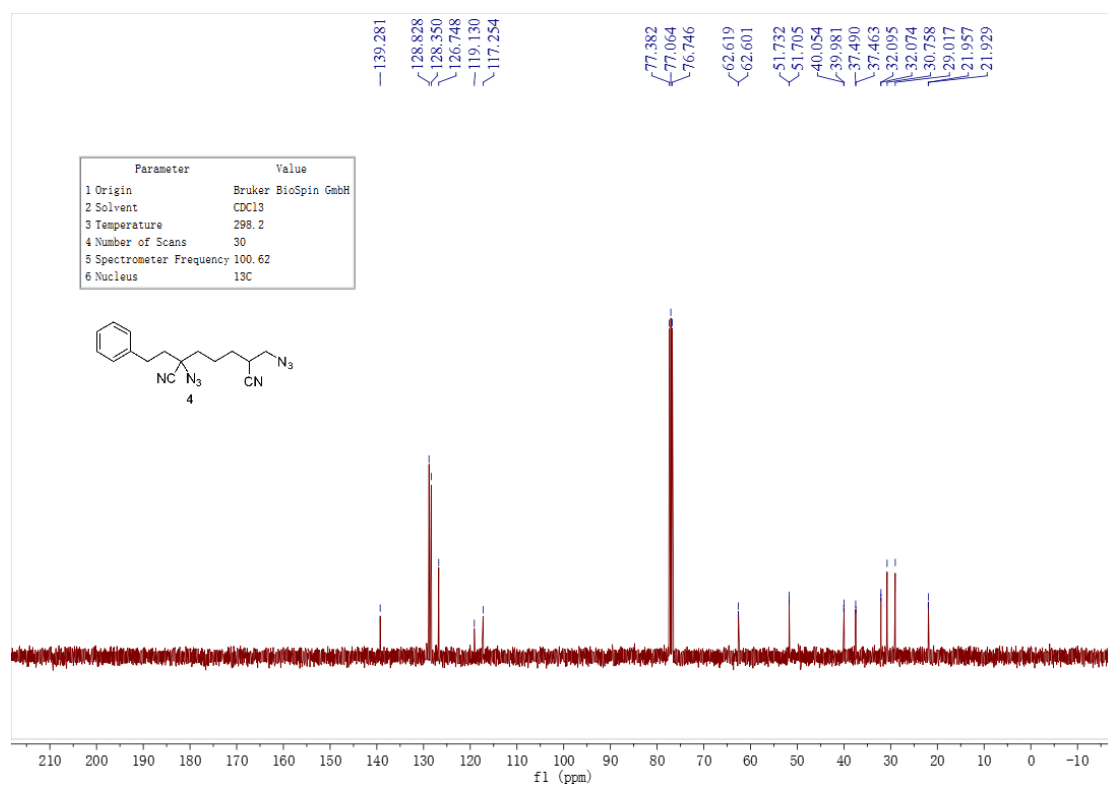

Supplement: d1cc06687k1.pdf [file d1cc06687k1.pdf]
